# Supplementary material for: Population Scale Analysis of Centromeric Satellite DNA Reveals Highly Dynamic Evolutionary Patterns and Genomic Organization in Long-Tailed and Rhesus Macaques
Source: MDPI journal article supplement (doi:10.3390/cells11121953), 2022-06-17
Supplement: s1 [file s1]

**Table S1.** Sampled populations of macaques at location sites in Thailand.

| Abbreviation/Code | Number of specimen | Location                                           | Geographic coordinates | Species                                 |
|-------------------|--------------------|----------------------------------------------------|------------------------|-----------------------------------------|
| BPN               | 17                 | Baan Pak Nam, Suratthani                           | 8.999800, 98.817565    | <i>Macaca fascicularis fascicularis</i> |
| BSS               | 40                 | Baan Sang School, Buengkarn                        | 17.859684, 103.959704  | <i>Macaca mulatta</i>                   |
| KN                | 18                 | Khao Nor, Nakhonsawan                              | 15.944844, 99.876868   | <i>Macaca fascicularis fascicularis</i> |
| KNG               | 19                 | Khao Ngu, Ratchaburi                               | 13.569441, 99.774925   | <i>Macaca fascicularis fascicularis</i> |
| KNKTK             | 20                 | Khao Noi Khao Tangkuan, Songkhla                   | 7.211619, 100.593992   | <i>Macaca fascicularis fascicularis</i> |
| KSP               | 21                 | Kosumpi, Mahasarakham                              | 16.253749, 103.067346  | <i>Macaca fascicularis fascicularis</i> |
| MFRC              | 10                 | Mangrove Forest Research Center, Ranong            | 9.875440, 98.604602    | <i>Macaca fascicularis aurea</i>        |
| SSD               | 20                 | Somdet Phra Sinagarindra Park, Chumphon            | 9.947496, 99.039400    | <i>Macaca fascicularis fascicularis</i> |
| SY                | 14                 | Sai Yok, <a href="#">Kanchanaburi</a>              | 14.450672, 98.850287   | <i>Macaca fascicularis fascicularis</i> |
| WHM               | 20                 | Wat Haad Moon, Pichit                              | 16.505553, 100.281847  | <i>Macaca fascicularis fascicularis</i> |
| WKH               | 19                 | Wat Kuha Pimuk, Yala                               | 6.527541, 101.224451   | <i>Macaca fascicularis fascicularis</i> |
| WKT               | 21                 | Wat Khao Thamon, Petchaburi                        | 13.046734, 99.951231   | <i>Macaca fascicularis fascicularis</i> |
| WPN               | 6                  | Wat Pak Nam, Ranong                                | 9.953746, 98.589608    | <i>Macaca fascicularis aurea</i>        |
| WPT               | 40                 | Wat Pattanajit, Nakhon Phanom                      | 17.083981, 104.511482  | <i>Macaca mulatta</i>                   |
| WSK               | 20                 | Wat Suwan Khuha, Pang-nga                          | 8.428850, 98.471612    | <i>Macaca fascicularis fascicularis</i> |
| WTM               | 20                 | Watthammasala , Nakhon Pathom                      | 13.812083, 100.114738  | <i>Macaca fascicularis fascicularis</i> |
| WTPMH             | 33                 | Wat Tham Pa Mak Ho, Loei                           | 17.233897, 101.780720  | <i>Macaca mulatta</i>                   |
| WTT               | 20                 | <a href="#">Wat Tham Thep Ban Dan</a> , Phetchabun | 15.748736, 101.035112  | <i>Macaca fascicularis fascicularis</i> |

**Table S2.** Kmer-based characterization of subfamilies in macaque cen-satDNA

| Satellite Family | Kmer length (bp) | Variant index | K-mer coverage score | Predicted Monomers (bp) |
|------------------|------------------|---------------|----------------------|-------------------------|
| cent-Msat1       | 27               | 1             | 0.55                 | 172                     |
| cent-Msat2       | 23               | 2             | 0.54                 | 171                     |
| cent-Msat3       | 27               | 3             | 0.51                 | 343                     |
| cent-Msat4       | 11               | 2             | 0.47                 | 172                     |
| cent-Msat5       | 11               | 1             | 0.45                 | 171                     |
| cent-Msat6       | 23               | 5             | 0.44                 | 343                     |
| cent-Msat7       | 23               | 3             | 0.42                 | 172                     |
| cent-Msat8       | 15               | 2             | 0.41                 | 172                     |
| cent-Msat9       | 15               | 1             | 0.39                 | 171                     |
| cent-Msat10      | 27               | 2             | 0.37                 | 172                     |
| cent-Msat11      | 19               | 2             | 0.36                 | 172                     |
| cent-Msat12      | 19               | 1             | 0.33                 | 171                     |
| cent-Msat13      | 23               | 1             | 0.24                 | 169                     |
| cent-Msat14      | 23               | 4             | 0.24                 | 173                     |

**Table S3.** Chromosomal localization and genomic organization of cen-satDNA based on alignment in respective macaque genomes

| Rhesus macaque     |                 |                     |                   |                                 |
|--------------------|-----------------|---------------------|-------------------|---------------------------------|
| Chromosome NCBI ID | Chromosome name | Start position (bp) | End position (bp) | Number of cen-satDNA alignments |
| NC_041754.1        | Chromosome 1    | 87,650,676          | 87,771,732        | 1,269                           |
| NC_041755.1        | Chromosome 2    | 65,732,492          | 65,815,243        | 260                             |
| NC_041755.1        | Chromosome 2    | 66,984,563          | 67,579,764        | 4,452                           |
| NC_041756.1        | Chromosome 3    | 55,318,685          | 55,321,036        | 2                               |
| NC_041756.1        | Chromosome 3    | 55,650,778          | 55,869,407        | 1,703                           |
| NC_041757.1        | Chromosome 4    | 49,410,049          | 49,571,840        | 1,708                           |
| NC_041757.1        | Chromosome 4    | 50,646,191          | 50,719,328        | 1,185                           |
| NC_041758.1        | Chromosome 5    | 48,529,732          | 48,549,734        | 29                              |
| NC_041758.1        | Chromosome 5    | 82,067,638          | 82,346,004        | 3,022                           |
| NC_041758.1        | Chromosome 5    | 83,346,005          | 83,429,258        | 380                             |
| NC_041759.1        | Chromosome 6    | 46,432,987          | 46,617,448        | 562                             |
| NC_041759.1        | Chromosome 6    | 47,617,455          | 47,875,507        | 4,123                           |
| NC_041760.1        | Chromosome 7    | 59,764,658          | 59,885,848        | 361                             |
| NC_041760.1        | Chromosome 7    | 60,885,863          | 60,985,042        | 801                             |
| NC_041761.1        | Chromosome 8    | 44,846,708          | 45,193,714        | 3,817                           |

|             |               |            |            |       |
|-------------|---------------|------------|------------|-------|
| NC_041761.1 | Chromosome 8  | 46,193,803 | 46,237,201 | 599   |
| NC_041762.1 | Chromosome 9  | 1          | 35,502     | 156   |
| NC_041762.1 | Chromosome 9  | 38,632,896 | 38,807,112 | 3,010 |
| NC_041762.1 | Chromosome 9  | 41,530,338 | 41,628,824 | 328   |
| NC_041763.1 | Chromosome 10 | 37,811,900 | 37,901,665 | 722   |
| NC_041764.1 | Chromosome 11 | 36,400,064 | 36,929,713 | 5,353 |
| NC_041764.1 | Chromosome 11 | 37,929,773 | 37,996,966 | 987   |
| NC_041764.1 | Chromosome 11 | 38,290,579 | 38,316,450 | 12    |
| NC_041764.1 | Chromosome 11 | 98,387,203 | 98,387,508 | 15    |
| NC_041765.1 | Chromosome 12 | 23,463,668 | 2,3624,702 | 299   |
| NC_041765.1 | Chromosome 12 | 24,625,279 | 24,702,686 | 255   |
| NC_041766.1 | Chromosome 13 | 19,815,670 | 20,046,407 | 821   |
| NC_041766.1 | Chromosome 13 | 21,248,652 | 21,458,908 | 1,877 |
| NC_041767.1 | Chromosome 14 | 60,444,990 | 60,647,941 | 983   |
| NC_041767.1 | Chromosome 14 | 61,648,126 | 62,060,218 | 4,684 |
| NC_041768.1 | Chromosome 15 | 18,805,172 | 18,927,257 | 940   |
| NC_041768.1 | Chromosome 15 | 19,927,278 | 20,001,249 | 828   |
| NC_041769.1 | Chromosome 16 | 21,831,078 | 22,037,084 | 1,815 |
| NC_041770.1 | Chromosome 17 | 42,785,447 | 42,857,230 | 317   |

|             |               |             |             |       |
|-------------|---------------|-------------|-------------|-------|
| NC_041770.1 | Chromosome 17 | 46,670,518  | 46,694,778  | 191   |
| NC_041771.1 | Chromosome 18 | 25,807,458  | 25,964,657  | 1,594 |
| NC_041771.1 | Chromosome 18 | 26,964,658  | 27,581,830  | 7,981 |
| NC_041772.1 | Chromosome 19 | 23,827,408  | 24,310,526  | 6,081 |
| NC_041772.1 | Chromosome 19 | 25,365,656  | 25,642,488  | 2,643 |
| NC_041773.1 | Chromosome 20 | 31,488,990  | 31,751,982  | 3,550 |
| NC_041774.1 | Chromosome 21 | 59,235,113  | 59,534,281  | 4,178 |
| NC_041774.1 | Chromosome X  | 59,787,912  | 59,788,447  | 4     |
| NC_041774.1 | Chromosome X  | 153,297,551 | 153,388,880 | 581   |

#### Long-tailed macaque

|             |              |           |           |      |
|-------------|--------------|-----------|-----------|------|
| NC_052255.1 | Chromosome 1 | 86408389  | 86602023  | 335  |
| NC_052256.1 | Chromosome 2 | 127840778 | 127949959 | 76   |
| NC_052256.1 | Chromosome 2 | 128087615 | 128342568 | 256  |
| NC_052257.1 | Chromosome 3 | 129089879 | 129134705 | 244  |
| NC_052257.1 | Chromosome 3 | 129486163 | 129486503 | 1    |
| NC_052257.1 | Chromosome 3 | 129680700 | 129888449 | 1434 |
| NC_052257.1 | Chromosome 3 | 184885787 | 184904096 | 47   |
| NC_052258.1 | Chromosome 4 | 118605433 | 118635340 | 436  |
| NC_052258.1 | Chromosome 4 | 118990224 | 119014859 | 43   |

|             |               |          |          |      |
|-------------|---------------|----------|----------|------|
| NC_052259.1 | Chromosome 5  | 48502220 | 48523653 | 46   |
| NC_052259.1 | Chromosome 5  | 81981776 | 82034835 | 187  |
| NC_052260.1 | Chromosome 6  | 46302277 | 46479705 | 621  |
| NC_052261.1 | Chromosome 7  | 58088319 | 58212686 | 735  |
| NC_052262.1 | Chromosome 8  | 43698917 | 43913654 | 1634 |
| NC_052263.1 | Chromosome 9  | 39290774 | 39411677 | 420  |
| NC_052263.1 | Chromosome 9  | 41715178 | 41720722 | 50   |
| NC_052264.1 | Chromosome 10 | 6667     | 7176     | 3    |
| NC_052265.1 | Chromosome 11 | 35091449 | 35216613 | 263  |
| NC_052265.1 | Chromosome 11 | 95546558 | 95546863 | 15   |
| NC_052267.1 | Chromosome 13 | 19727737 | 19858343 | 186  |
| NC_052268.1 | Chromosome 14 | 65465608 | 65574565 | 158  |
| NC_052269.1 | Chromosome 15 | 93381979 | 93430059 | 235  |
| NC_052270.1 | Chromosome 16 | 55633514 | 55691499 | 1016 |
| NC_052271.1 | Chromosome 17 | 40444504 | 40449148 | 45   |
| NC_052271.1 | Chromosome 17 | 44801804 | 44824218 | 203  |
| NC_052272.1 | Chromosome 18 | 25767597 | 25918773 | 877  |
| NC_052273.1 | Chromosome 19 | 23772453 | 23822461 | 441  |
| NC_052274.1 | Chromosome 20 | 31185974 | 31217501 | 27   |

|             |               |          |          |     |
|-------------|---------------|----------|----------|-----|
| NC_052274.1 | Chromosome 20 | 31912115 | 31957043 | 127 |
| NC_052275.1 | Chromosome X  | 58339519 | 58397258 | 106 |
| NC_052275.1 | Chromosome X  | 58650836 | 58651573 | 5   |

---
