# Supplementary material for: Population Scale Analysis of Centromeric Satellite DNA Reveals Highly Dynamic Evolutionary Patterns and Genomic Organization in Long-Tailed and Rhesus Macaques
Source: Cells. 2022 Jun 17;11(12):1953. doi: 10.3390/cells11121953 (PMC9221937; doi:10.3390/cells11121953)
Supplement: Supplementary file 1 [file cells-11-01953-s001.zip]

Archive with 11 entries (11 files):
- cells-1756620-supplementary figures.pdf
- cells-1756620-supplementary tables.pdf
- Figure S1 proof.tif
- Figure S2 proof.tif
- Figure S3 proof.tif
- Figure S4 proof.tif
- figure S5 proof.tif
- figure S6 proof.tif
- Supplementary Dataset S1.xlsx
- Supplementary Dataset S2.xlsx
- Supplementary Dataset S3.xlsx
