# Supplementary material for: Population Scale Analysis of Centromeric Satellite DNA Reveals Highly Dynamic Evolutionary Patterns and Genomic Organization in Long-Tailed and Rhesus Macaques
Source: Cells. 2022 Jun 17;11(12):1953. doi: 10.3390/cells11121953 (PMC9221937; doi:10.3390/cells11121953)
Supplement: Supplementary file 1 [file cells-11-01953-s001.zip › Supplementary Dataset S1.xlsx]

## Sheet: satellite_macaques_data_edited
Supplementary dataset S1		Genomic features of cen-satDNA-assembled contigs in macaque populations.
Population	Contig ID	GC percentage	Approx. Consensus Length	Mean Coverage
BPN	35_S35ID Assembly Contig 5	0.402	331	806.689
BPN	311_S311ID Assembly Contig 1	0.412	330	661.548
BPN	6_S6ID Assembly Contig 1	0.412	330	639.552
BPN	40_S40ID Assembly Contig 1	0.412	329	353.198
BPN	153_S153ID Assembly Contig 1	0.402	328	753.857
BPN	252_S252ID Assembly Contig 2	0.412	326	669.334
BPN	342_S342ID Assembly Contig 1	0.402	326	744.445
BPN	15_S15ID Assembly Contig 1	0.412	326	487.034
BPN	343_S343ID Assembly Contig 2	0.412	324	231.809
BPN	328_S328ID Assembly Contig 1	0.402	323	782.238
BPN	130_S130ID Assembly Contig 1	0.412	321	564.701
BPN	234_S234ID Assembly Contig 1	0.412	321	214.682
BPN	14_S14ID Assembly Contig 2	0.413	320	118.675
BPN	23_S23ID Assembly Contig 1	0.412	320	396.569
BPN	170_S170ID Assembly Contig 1	0.41	319	30.9248
BPN	20_S20ID Assembly Contig 4	0.412	318	130.796
BPN	104_S104ID Assembly Contig 1	0.401	318	13.9748
BPN	100_S100ID Assembly Contig 1	0.412	318	165.343
BPN	55_S55ID Assembly Contig 1	0.41	317	37.9811
BPN	52_S52ID Assembly Contig 1	0.412	317	322.331
BPN	260_S260ID Assembly Contig 1	0.403	317	98.858
BPN	349_S349ID Assembly Contig 2	0.403	317	135.7
BPN	236_S236ID Assembly Contig 1	0.412	317	104.751
BPN	334_S334ID Assembly Contig 1	0.402	316	86.8513
BPN	267_S267ID Assembly Contig 1	0.412	316	6.9557
BPN	155_S155ID Assembly Contig 1	0.42	316	4
BPN	207_S207ID Assembly Contig 1	0.413	316	104.832
BPN	246_S246ID Assembly Contig 2	0.399	316	19.9968
BPN	371_S371ID Assembly Contig 2	0.401	316	15.9937
BPN	199_S199ID Assembly Contig 1	0.414	316	46.9114
BPN	37_S37ID Assembly Contig 1	0.399	316	6.99051
BPN	322_S322ID Assembly Contig 1	0.4	316	10.9873
BPN	373_S373ID Assembly Contig 1	0.412	316	16.9842
BPN	74_S74ID Assembly Contig 2	0.411	316	28.981
BPN	227_S227ID Assembly Contig 1	0.396	316	6.99684
BPN	352_S352ID Assembly Contig 2	0.413	316	37.9177
BPN	215_S215ID Assembly Contig 1	0.398	316	14.9652
BPN	90_S90ID Assembly Contig 1	0.41	304	2
BPN	138_S138ID Assembly Contig 1	0.402		6306.47
BPN	239_S239ID Assembly Contig 1	0.412		1318.87
BPN	196_S196ID Assembly Contig 1	0.402		3532.34
BPN	338_S338ID Assembly Contig 2	0.402		6594.41
BPN	262_S262ID Assembly Contig 1	0.412		1230.7
BPN	82_S82ID Assembly Contig 1	0.402		1771.36
BPN	159_S159ID Assembly Contig 1	0.402		1513.94
BPN	115_S115ID Assembly Contig 1	0.402		2409.9
BPN	221_S221ID Assembly Contig 1	0.402		3337.76
BPN	297_S297ID Assembly Contig 1	0.402		2523.48
BPN	248_S248ID Assembly Contig 1	0.402		3735.57
BPN	127_S127ID Assembly Contig 1	0.402		1066.73
BPN	230_S230ID Assembly Contig 1	0.402		2967.29
BPN	146_S146ID Assembly Contig 1	0.402		1185.46
BSS	77_S77ID Assembly Contig 3	0.402	335	968.119
BSS	217_S217ID Assembly Contig 2	0.413	332	947.669
BSS	191_S191ID Assembly Contig 4	0.413	331	538.562
BSS	287_S287ID Assembly Contig 4	0.402	331	865.752
BSS	258_S258ID Assembly Contig 2	0.412	330	549.433
BSS	85_S85ID Assembly Contig 2	0.403	329	565.909
BSS	301_S301ID Assembly Contig 72	0.413	329	939.347
BSS	180_S180ID Assembly Contig 2	0.413	328	926.777
BSS	338_S338ID Assembly Contig 1	0.402	327	260.572
BSS	89_S89ID Assembly Contig 5	0.413	327	452.135
BSS	160_S160ID Assembly Contig 4	0.413	326	466.031
BSS	252_S252ID Assembly Contig 11	0.413	326	358.218
BSS	372_S372ID Assembly Contig 12	0.413	326	494.457
BSS	326_S326ID Assembly Contig 3	0.413	324	465.164
BSS	29_S29ID Assembly Contig 5	0.412	324	429.012
BSS	350_S350ID Assembly Contig 2	0.413	323	616.845
BSS	161_S161ID Assembly Contig 2	0.413	322	456.699
BSS	127_S127ID Assembly Contig 2	0.413	322	362.311
BSS	24_S24ID Assembly Contig 3	0.412	322	480.311
BSS	176_S176ID Assembly Contig 1	0.413	322	365.065
BSS	27_S27ID Assembly Contig 2	0.414	322	271.578
BSS	357_S357ID Assembly Contig 2	0.412	320	161.7
BSS	294_S294ID Assembly Contig 3	0.412	320	62.8563
BSS	181_S181ID Assembly Contig 4	0.414	320	151.088
BSS	175_S175ID Assembly Contig 3	0.412	320	212.863
BSS	265_S265ID Assembly Contig 4	0.412	320	155.325
BSS	272_S272ID Assembly Contig 4	0.413	320	176.603
BSS	372_S372ID Assembly Contig 10	0.402	320	226.394
BSS	68_S68ID Assembly Contig 2	0.411	320	151.797
BSS	209_S209ID Assembly Contig 1	0.412	319	51.9687
BSS	139_S139ID Assembly Contig 2	0.413	319	157.865
BSS	138_S138ID Assembly Contig 4	0.412	319	178.865
BSS	278_S278ID Assembly Contig 2	0.404	318	140.248
BSS	252_S252ID Assembly Contig 12	0.413	318	154.664
BSS	156_S156ID Assembly Contig 1	0.411	318	161.726
BSS	2_S2ID Assembly Contig 1	0.413	317	16.9905
BSS	34_S34ID Assembly Contig 3	0.414	317	171.568
BSS	301_S301ID Assembly Contig 13	0.415	317	49.9338
BSS	304_S304ID Assembly Contig 1	0.409	317	66.8707
BSS	28_S28ID Assembly Contig 5	0.403	317	167.565
BSS	14_S14ID Assembly Contig 7	0.416	317	56.9306
BSS	248_S248ID Assembly Contig 4	0.411	317	80.8013
BSS	88_S88ID Assembly Contig 2	0.413	316	62.9367
BSS	309_S309ID Assembly Contig 1	0.404	316	11.9747
BSS	286_S286ID Assembly Contig 1	0.402	316	14.9937
BSS	6_S6ID Assembly Contig 2	0.406	316	9.98734
BSS	254_S254ID Assembly Contig 1	0.403	316	8.98734
BSS	287_S287ID Assembly Contig 1	0.39	316	7.97468
BSS	262_S262ID Assembly Contig 2	0.395	316	6.99051
BSS	55_S55ID Assembly Contig 2	0.397	316	6
BSS	167_S167ID Assembly Contig 2	0.389	316	6
BSS	32_S32ID Assembly Contig 2	0.411	316	5.99684
BSS	270_S270ID Assembly Contig 2	0.4	316	6
BSS	199_S199ID Assembly Contig 2	0.401	316	9
BSS	8_S8ID Assembly Contig 2	0.405	316	10.9905
BSS	329_S329ID Assembly Contig 3	0.408	316	7.98734
BSS	70_S70ID Assembly Contig 2	0.393	316	5.99684
BSS	26_S26ID Assembly Contig 1	0.389	316	6
BSS	80_S80ID Assembly Contig 2	0.402	316	5
BSS	157_S157ID Assembly Contig 3	0.4	316	9.98418
BSS	337_S337ID Assembly Contig 3	0.415	316	19.9652
BSS	141_S141ID Assembly Contig 1	0.396	316	7.99051
BSS	70_S70ID Assembly Contig 3	0.392	316	5.99367
BSS	191_S191ID Assembly Contig 3	0.397	316	5.99684
BSS	22_S22ID Assembly Contig 4	0.413	316	42.8259
BSS	364_S364ID Assembly Contig 4	0.413	316	62.6203
BSS	324_S324ID Assembly Contig 2	0.401	316	12.9905
BSS	287_S287ID Assembly Contig 3	0.4	316	8.99684
BSS	231_S231ID Assembly Contig 4	0.404	316	8.99684
BSS	1_S1ID Assembly Contig 3	0.403	316	5.99684
BSS	238_S238ID Assembly Contig 3	0.416	316	6
BSS	94_S94ID Assembly Contig 3	0.415	316	79.9747
BSS	303_S303ID Assembly Contig 3	0.399	316	12.9778
BSS	230_S230ID Assembly Contig 4	0.407	316	3.87658
BSS	237_S237ID Assembly Contig 4	0.412	316	34.9684
BSS	14_S14ID Assembly Contig 1	0.412	316	10.981
BSS	27_S27ID Assembly Contig 3	0.405	316	12.9905
BSS	371_S371ID Assembly Contig 1	0.4	316	16
BSS	362_S362ID Assembly Contig 1	0.4	316	10.9715
BSS	374_S374ID Assembly Contig 3	0.406	316	8.98734
BSS	343_S343ID Assembly Contig 6	0.406	316	7.97785
BSS	329_S329ID Assembly Contig 4	0.413	316	6.98734
BSS	301_S301ID Assembly Contig 56	0.397	316	5.98101
BSS	301_S301ID Assembly Contig 55	0.406	316	5.98418
BSS	124_S124ID Assembly Contig 3	0.415	316	101.864
BSS	39_S39ID Assembly Contig 6	0.399	316	4
BSS	21_S21ID Assembly Contig 5	0.412	316	19.9715
BSS	252_S252ID Assembly Contig 10	0.399	316	6.97785
BSS	5_S5ID Assembly Contig 4	0.402	316	14
BSS	206_S206ID Assembly Contig 1	0.411	316	5.99051
BSS	371_S371ID Assembly Contig 6	0.413	316	50.8481
BSS	353_S353ID Assembly Contig 1	0.405	316	10
BSS	193_S193ID Assembly Contig 1	0.398	316	6
BSS	4_S4ID Assembly Contig 1	0.403	316	3
BSS	266_S266ID Assembly Contig 1	0.399	316	31.9146
BSS	157_S157ID Assembly Contig 1	0.401	316	20.9177
BSS	85_S85ID Assembly Contig 1	0.395	316	11.9905
BSS	312_S312ID Assembly Contig 1	0.411	316	6.98418
BSS	318_S318ID Assembly Contig 1	0.411	316	5.99684
BSS	229_S229ID Assembly Contig 1	0.399	316	6
BSS	24_S24ID Assembly Contig 5	0.413	316	91.9177
BSS	24_S24ID Assembly Contig 4	0.411	316	67.8544
BSS	13_S13ID Assembly Contig 4	0.414	316	64.9019
BSS	7_S7ID Assembly Contig 7	0.405	316	7.96519
BSS	12_S12ID Assembly Contig 1	0.395	316	20.9652
BSS	371_S371ID Assembly Contig 8	0.399	316	20.9968
BSS	365_S365ID Assembly Contig 5	0.409	316	11
BSS	363_S363ID Assembly Contig 3	0.404	316	9.98101
BSS	356_S356ID Assembly Contig 3	0.389	316	6.97468
BSS	353_S353ID Assembly Contig 5	0.394	316	6
BSS	352_S352ID Assembly Contig 6	0.408	316	5
BSS	350_S350ID Assembly Contig 6	0.388	316	4.98418
BSS	292_S292ID Assembly Contig 6	0.399	316	17.981
BSS	189_S189ID Assembly Contig 7	0.4	316	11.9842
BSS	180_S180ID Assembly Contig 6	0.395	316	8.99684
BSS	109_S109ID Assembly Contig 1	0.399	316	17
BSS	48_S48ID Assembly Contig 1	0.396	316	6.99367
BSS	362_S362ID Assembly Contig 2	0.404	316	7.9557
BSS	38_S38ID Assembly Contig 1	0.396	316	7.97785
BSS	192_S192ID Assembly Contig 1	0.399	316	3.99367
BSS	374_S374ID Assembly Contig 2	0.404	316	3.96835
BSS	202_S202ID Assembly Contig 1	0.412	316	84.9209
BSS	361_S361ID Assembly Contig 2	0.394	316	8
BSS	7_S7ID Assembly Contig 2	0.397	315	4
BSS	8_S8ID Assembly Contig 1	0.404	308	1.98701
BSS	248_S248ID Assembly Contig 3	0.4	307	1.99674
BSS	240_S240ID Assembly Contig 2	0.623	296	2.98649
BSS	255_S255ID Assembly Contig 3	0.615	296	6.96284
BSS	233_S233ID Assembly Contig 2	0.607	296	3.97635
BSS	102_S102ID Assembly Contig 1	0.403		1043.09
BSS	50_S50ID Assembly Contig 1	0.403		2997.43
BSS	110_S110ID Assembly Contig 1	0.403		6923.58
BSS	298_S298ID Assembly Contig 2	0.413		1201.41
BSS	257_S257ID Assembly Contig 2	0.403		14240
BSS	345_S345ID Assembly Contig 2	0.413		2391.9
BSS	146_S146ID Assembly Contig 2	0.402		2164.37
BSS	132_S132ID Assembly Contig 3	0.403		6885.84
BSS	302_S302ID Assembly Contig 1	0.413		1467.36
BSS	2_S2ID Assembly Contig 2	0.403		10597.1
BSS	288_S288ID Assembly Contig 3	0.413		2046.32
BSS	11_S11ID Assembly Contig 2	0.403		1299
BSS	354_S354ID Assembly Contig 4	0.403		5164.52
BSS	89_S89ID Assembly Contig 3	0.402		2568.83
BSS	268_S268ID Assembly Contig 2	0.403		1230.2
BSS	310_S310ID Assembly Contig 4	0.403		8270.88
BSS	33_S33ID Assembly Contig 2	0.413		1436.72
BSS	141_S141ID Assembly Contig 2	0.403		4015.2
BSS	148_S148ID Assembly Contig 4	0.403		2299.28
BSS	180_S180ID Assembly Contig 3	0.403		1057.9
BSS	22_S22ID Assembly Contig 5	0.402		6555.82
BSS	21_S21ID Assembly Contig 3	0.413		1330.12
BSS	343_S343ID Assembly Contig 1	0.403		9565.09
BSS	301_S301ID Assembly Contig 54	0.413		1834.51
BSS	83_S83ID Assembly Contig 4	0.403		4577.07
BSS	244_S244ID Assembly Contig 5	0.403		1824.77
BSS	13_S13ID Assembly Contig 1	0.402		3292.08
BSS	246_S246ID Assembly Contig 7	0.402		1241.95
BSS	364_S364ID Assembly Contig 1	0.403		6895.23
BSS	129_S129ID Assembly Contig 1	0.413		1377.36
BSS	228_S228ID Assembly Contig 1	0.402		5786.93
BSS	376_S376ID Assembly Contig 1	0.413		1157.45
BSS	7_S7ID Assembly Contig 6	0.402		2559.78
BSS	86_S86ID Assembly Contig 1	0.402		1720.82
BSS	358_S358ID Assembly Contig 8	0.403		7923.8
BSS	316_S316ID Assembly Contig 6	0.413		1478.77
BSS	159_S159ID Assembly Contig 4	0.403		5407.33
BSS	89_S89ID Assembly Contig 4	0.403		2560.81
BSS	71_S71ID Assembly Contig 1	0.403		4515.41
BSS	365_S365ID Assembly Contig 6	0.403		2281.37
BSS	120_S120ID Assembly Contig 2	0.403		3587.26
BSS	358_S358ID Assembly Contig 2	0.403		1627.46
BSS	244_S244ID Assembly Contig 2	0.401		3542.38
KN	312_S312ID Assembly Contig 2	0.413	338	754.728
KN	237_S237ID Assembly Contig 2	0.413	333	960.556
KN	48_S48ID Assembly Contig 2	0.413	329	571
KN	90_S90ID Assembly Contig 2	0.411	329	282.757
KN	288_S288ID Assembly Contig 2	0.412	328	610.796
KN	370_S370ID Assembly Contig 2	0.402	327	759.257
KN	160_S160ID Assembly Contig 2	0.402	326	915.718
KN	63_S63ID Assembly Contig 2	0.412	326	542.175
KN	296_S296ID Assembly Contig 2	0.402	325	550.828
KN	60_S60ID Assembly Contig 2	0.412	323	532.601
KN	81_S81ID Assembly Contig 2	0.413	322	388.534
KN	316_S316ID Assembly Contig 3	0.413	321	146.773
KN	364_S364ID Assembly Contig 2	0.413	318	132.33
KN	44_S44ID Assembly Contig 2	0.411	318	49.8616
KN	335_S335ID Assembly Contig 2	0.412	318	7
KN	317_S317ID Assembly Contig 1	0.413	318	445.267
KN	174_S174ID Assembly Contig 2	0.412	318	264.632
KN	109_S109ID Assembly Contig 2	0.413	318	131.811
KN	184_S184ID Assembly Contig 2	0.413	318	193.132
KN	320_S320ID Assembly Contig 2	0.412	318	38.9308
KN	207_S207ID Assembly Contig 2	0.409	318	38.9057
KN	220_S220ID Assembly Contig 2	0.41	317	59.8297
KN	368_S368ID Assembly Contig 2	0.412	317	109.785
KN	314_S314ID Assembly Contig 2	0.413	317	120.621
KN	128_S128ID Assembly Contig 2	0.409	317	11.9779
KN	329_S329ID Assembly Contig 2	0.412	317	43.9432
KN	163_S163ID Assembly Contig 1	0.401	317	16.9874
KN	297_S297ID Assembly Contig 2	0.413	317	81.7823
KN	145_S145ID Assembly Contig 2	0.403	316	7
KN	226_S226ID Assembly Contig 2	0.408	316	9.98418
KN	321_S321ID Assembly Contig 2	0.413	316	27.9051
KN	53_S53ID Assembly Contig 2	0.403	316	6.9557
KN	113_S113ID Assembly Contig 2	0.396	316	6.95253
KN	69_S69ID Assembly Contig 2	0.404	316	5.99684
KN	305_S305ID Assembly Contig 2	0.402	316	5
KN	91_S91ID Assembly Contig 2	0.394	316	5
KN	10_S10ID Assembly Contig 1	0.414	316	34.9241
KN	9_S9ID Assembly Contig 2	0.4	316	33.9494
KN	22_S22ID Assembly Contig 2	0.405	316	7.91139
KN	138_S138ID Assembly Contig 2	0.398	316	6.99684
KN	268_S268ID Assembly Contig 1	0.394	316	5.99684
KN	373_S373ID Assembly Contig 2	0.399	316	16.9747
KN	245_S245ID Assembly Contig 2	0.397	316	9.95253
KN	263_S263ID Assembly Contig 1	0.41	316	15.9494
KN	222_S222ID Assembly Contig 2	0.411	316	16.9778
KN	29_S29ID Assembly Contig 2	0.404	316	7.95253
KN	23_S23ID Assembly Contig 2	0.401	316	107.829
KN	148_S148ID Assembly Contig 1	0.381	302	2
KN	291_S291ID Assembly Contig 2	0.402		6995.39
KN	197_S197ID Assembly Contig 2	0.412		1410.48
KN	247_S247ID Assembly Contig 2	0.402		4102.84
KN	157_S157ID Assembly Contig 2	0.402		1081.62
KN	51_S51ID Assembly Contig 2	0.402		2188.01
KN	331_S331ID Assembly Contig 2	0.403		3944.65
KN	240_S240ID Assembly Contig 1	0.402		5344.07
KN	267_S267ID Assembly Contig 2	0.402		2477.67
KN	144_S144ID Assembly Contig 2	0.402		10714.3
KN	275_S275ID Assembly Contig 2	0.412		2024.88
KN	134_S134ID Assembly Contig 2	0.402		4318.66
KN	264_S264ID Assembly Contig 1	0.403		1240.22
KN	347_S347ID Assembly Contig 2	0.402		4217.22
KN	140_S140ID Assembly Contig 1	0.402		1554.56
KN	130_S130ID Assembly Contig 2	0.402		6342.51
KN	253_S253ID Assembly Contig 2	0.412		1137.66
KN	92_S92ID Assembly Contig 1	0.402		6844.32
KN	98_S98ID Assembly Contig 2	0.413		1373.38
KN	82_S82ID Assembly Contig 2	0.402		2877.56
KN	176_S176ID Assembly Contig 2	0.402		1153.71
KNG	185_S185ID Assembly Contig 1	0.402	338	924.396
KNG	368_S368ID Assembly Contig 3	0.403	334	865.844
KNG	210_S210ID Assembly Contig 1	0.412	331	481.211
KNG	237_S237ID Assembly Contig 3	0.402	331	339.039
KNG	337_S337ID Assembly Contig 2	0.412	327	668.092
KNG	370_S370ID Assembly Contig 3	0.413	326	389.178
KNG	300_S300ID Assembly Contig 2	0.412	326	706.218
KNG	72_S72ID Assembly Contig 1	0.413	325	207.914
KNG	365_S365ID Assembly Contig 3	0.402	325	550.908
KNG	1_S1ID Assembly Contig 2	0.413	325	580.954
KNG	95_S95ID Assembly Contig 1	0.413	324	745.426
KNG	96_S96ID Assembly Contig 1	0.413	324	392.565
KNG	310_S310ID Assembly Contig 3	0.412	323	422.65
KNG	276_S276ID Assembly Contig 2	0.412	321	301.305
KNG	135_S135ID Assembly Contig 2	0.414	319	340.154
KNG	292_S292ID Assembly Contig 2	0.412	319	132.931
KNG	218_S218ID Assembly Contig 2	0.412	319	151.727
KNG	364_S364ID Assembly Contig 3	0.411	318	97.4811
KNG	58_S58ID Assembly Contig 2	0.413	318	193.711
KNG	3_S3ID Assembly Contig 1	0.411	318	159.843
KNG	190_S190ID Assembly Contig 2	0.413	318	138.478
KNG	310_S310ID Assembly Contig 2	0.413	318	35.8553
KNG	24_S24ID Assembly Contig 2	0.413	318	39.9214
KNG	187_S187ID Assembly Contig 1	0.4	317	9.94953
KNG	162_S162ID Assembly Contig 2	0.411	317	22.9748
KNG	265_S265ID Assembly Contig 2	0.401	317	66.7981
KNG	55_S55ID Assembly Contig 3	0.411	317	11.9874
KNG	169_S169ID Assembly Contig 2	0.412	316	170.81
KNG	333_S333ID Assembly Contig 1	0.398	316	7.96203
KNG	355_S355ID Assembly Contig 3	0.394	316	5
KNG	215_S215ID Assembly Contig 2	0.41	316	34.8892
KNG	350_S350ID Assembly Contig 3	0.4	316	25.9525
KNG	33_S33ID Assembly Contig 1	0.411	316	46.9177
KNG	57_S57ID Assembly Contig 2	0.414	316	73.8449
KNG	89_S89ID Assembly Contig 2	0.402	316	69.8133
KNG	22_S22ID Assembly Contig 3	0.413	316	22.981
KNG	346_S346ID Assembly Contig 3	0.401	316	86.712
KNG	107_S107ID Assembly Contig 2	0.411	316	16.981
KNG	103_S103ID Assembly Contig 2	0.411	316	4.99684
KNG	222_S222ID Assembly Contig 3	0.401	316	11.981
KNG	167_S167ID Assembly Contig 3	0.401	316	4.99367
KNG	177_S177ID Assembly Contig 3	0.416	316	72.9304
KNG	60_S60ID Assembly Contig 3	0.403	316	7
KNG	219_S219ID Assembly Contig 3	0.398	316	19.9873
KNG	25_S25ID Assembly Contig 2	0.4	316	5.98734
KNG	170_S170ID Assembly Contig 3	0.405	316	48.8766
KNG	18_S18ID Assembly Contig 2	0.412	316	27.9114
KNG	359_S359ID Assembly Contig 3	0.609	296	7.96622
KNG	208_S208ID Assembly Contig 2	0.611	293	3
KNG	277_S277ID Assembly Contig 1	0.402		1747.66
KNG	150_S150ID Assembly Contig 2	0.403		4805.5
KNG	145_S145ID Assembly Contig 3	0.403		2472.94
KNG	54_S54ID Assembly Contig 2	0.402		3771.72
KNG	226_S226ID Assembly Contig 3	0.402		3575.96
KNG	345_S345ID Assembly Contig 3	0.402		7832.76
KNG	292_S292ID Assembly Contig 3	0.413		1351.5
KNG	75_S75ID Assembly Contig 3	0.403		7650.86
KNG	134_S134ID Assembly Contig 3	0.413		1286.61
KNG	118_S118ID Assembly Contig 1	0.403		4164.33
KNG	29_S29ID Assembly Contig 3	0.403		7083.4
KNG	232_S232ID Assembly Contig 2	0.413		1131.97
KNG	242_S242ID Assembly Contig 2	0.402		1384.19
KNG	275_S275ID Assembly Contig 3	0.402		2728.99
KNG	353_S353ID Assembly Contig 3	0.402		1114.23
KNG	7_S7ID Assembly Contig 3	0.402		3289.58
KNG	245_S245ID Assembly Contig 3	0.402		3788.5
KNKTK	45_S45ID Assembly Contig 4	0.402	343	946.426
KNKTK	301_S301ID Assembly Contig 42	0.402	340	855.082
KNKTK	377_S377ID Assembly Contig 3	0.402	335	943.585
KNKTK	14_S14ID Assembly Contig 3	0.411	333	416.477
KNKTK	301_S301ID Assembly Contig 39	0.412	331	488.42
KNKTK	301_S301ID Assembly Contig 45	0.412	330	613.17
KNKTK	301_S301ID Assembly Contig 47	0.412	329	779.769
KNKTK	324_S324ID Assembly Contig 3	0.402	329	966.517
KNKTK	275_S275ID Assembly Contig 4	0.412	328	492.881
KNKTK	352_S352ID Assembly Contig 1	0.412	328	476.902
KNKTK	295_S295ID Assembly Contig 4	0.412	327	587.456
KNKTK	372_S372ID Assembly Contig 5	0.413	325	322.6
KNKTK	246_S246ID Assembly Contig 3	0.402	325	511.806
KNKTK	222_S222ID Assembly Contig 4	0.402	322	528.696
KNKTK	301_S301ID Assembly Contig 41	0.412	321	131.726
KNKTK	212_S212ID Assembly Contig 4	0.401	320	564.038
KNKTK	226_S226ID Assembly Contig 5	0.413	318	83.8742
KNKTK	223_S223ID Assembly Contig 3	0.411	318	26.9403
KNKTK	32_S32ID Assembly Contig 4	0.413	318	165.833
KNKTK	357_S357ID Assembly Contig 3	0.408	318	16.9403
KNKTK	288_S288ID Assembly Contig 4	0.413	317	13.9558
KNKTK	207_S207ID Assembly Contig 3	0.412	317	49.8044
KNKTK	301_S301ID Assembly Contig 48	0.412	317	23
KNKTK	301_S301ID Assembly Contig 44	0.411	317	12.9464
KNKTK	189_S189ID Assembly Contig 3	0.412	317	75.817
KNKTK	367_S367ID Assembly Contig 5	0.409	317	53.9401
KNKTK	245_S245ID Assembly Contig 4	0.413	317	166.748
KNKTK	301_S301ID Assembly Contig 38	0.401	316	111.693
KNKTK	236_S236ID Assembly Contig 3	0.401	316	26.9842
KNKTK	143_S143ID Assembly Contig 4	0.4	316	6
KNKTK	301_S301ID Assembly Contig 40	0.409	316	28.9241
KNKTK	144_S144ID Assembly Contig 3	0.412	316	23.9209
KNKTK	304_S304ID Assembly Contig 4	0.412	316	56.9715
KNKTK	301_S301ID Assembly Contig 43	0.404	316	10.981
KNKTK	150_S150ID Assembly Contig 3	0.414	316	19.962
KNKTK	348_S348ID Assembly Contig 1	0.399	316	6.99684
KNKTK	372_S372ID Assembly Contig 6	0.413	316	130.851
KNKTK	367_S367ID Assembly Contig 4	0.399	316	31.9462
KNKTK	304_S304ID Assembly Contig 5	0.412	316	120.832
KNKTK	301_S301ID Assembly Contig 51	0.41	316	30.9589
KNKTK	244_S244ID Assembly Contig 3	0.396	316	15
KNKTK	85_S85ID Assembly Contig 3	0.394	307	2
KNKTK	354_S354ID Assembly Contig 7	0.626	296	4.98649
KNKTK	354_S354ID Assembly Contig 6	0.606	296	3.97297
KNKTK	351_S351ID Assembly Contig 4	0.603	296	3.95946
KNKTK	252_S252ID Assembly Contig 3	0.402		3124.38
KNKTK	191_S191ID Assembly Contig 5	0.402		6406.61
KNKTK	57_S57ID Assembly Contig 3	0.412		1167.73
KNKTK	180_S180ID Assembly Contig 1	0.402		1865.24
KNKTK	328_S328ID Assembly Contig 3	0.402		2398.24
KNKTK	256_S256ID Assembly Contig 2	0.402		2579.98
KNKTK	301_S301ID Assembly Contig 46	0.402		4865.48
KNKTK	267_S267ID Assembly Contig 3	0.402		2960.86
KNKTK	76_S76ID Assembly Contig 4	0.402		7278.05
KNKTK	63_S63ID Assembly Contig 3	0.413		1423.07
KNKTK	349_S349ID Assembly Contig 1	0.402		2045.26
KNKTK	344_S344ID Assembly Contig 4	0.402		7959.7
KNKTK	344_S344ID Assembly Contig 3	0.413		1434.08
KNKTK	301_S301ID Assembly Contig 50	0.402		5915.76
KNKTK	301_S301ID Assembly Contig 49	0.412		1150.68
KNKTK	239_S239ID Assembly Contig 4	0.402		4480.44
KSP	195_S195ID Assembly Contig 2	0.413	332	859.009
KSP	309_S309ID Assembly Contig 3	0.402	332	957.539
KSP	9_S9ID Assembly Contig 3	0.411	331	435.106
KSP	181_S181ID Assembly Contig 2	0.403	330	913.864
KSP	94_S94ID Assembly Contig 2	0.412	330	962.818
KSP	126_S126ID Assembly Contig 2	0.402	328	830.18
KSP	86_S86ID Assembly Contig 3	0.412	324	561.04
KSP	50_S50ID Assembly Contig 2	0.402	324	234.349
KSP	49_S49ID Assembly Contig 1	0.413	322	371.311
KSP	114_S114ID Assembly Contig 2	0.412	320	505.953
KSP	323_S323ID Assembly Contig 1	0.412	319	186.803
KSP	66_S66ID Assembly Contig 2	0.413	319	105.442
KSP	54_S54ID Assembly Contig 3	0.414	319	131.834
KSP	330_S330ID Assembly Contig 2	0.411	319	77.9498
KSP	282_S282ID Assembly Contig 4	0.401	319	228.505
KSP	209_S209ID Assembly Contig 2	0.41	319	46.953
KSP	179_S179ID Assembly Contig 2	0.413	319	163.034
KSP	64_S64ID Assembly Contig 2	0.402	318	149.906
KSP	319_S319ID Assembly Contig 2	0.413	318	114.381
KSP	151_S151ID Assembly Contig 3	0.41	318	106.783
KSP	93_S93ID Assembly Contig 2	0.399	317	45.9874
KSP	238_S238ID Assembly Contig 2	0.41	317	43.9653
KSP	172_S172ID Assembly Contig 2	0.402	317	18.9874
KSP	273_S273ID Assembly Contig 2	0.413	317	42.7666
KSP	284_S284ID Assembly Contig 2	0.389	317	6
KSP	92_S92ID Assembly Contig 2	0.413	317	114.852
KSP	20_S20ID Assembly Contig 2	0.392	316	6
KSP	282_S282ID Assembly Contig 2	0.396	316	5
KSP	173_S173ID Assembly Contig 3	0.388	316	5
KSP	312_S312ID Assembly Contig 3	0.396	316	4
KSP	2_S2ID Assembly Contig 3	0.4	316	22.9652
KSP	221_S221ID Assembly Contig 3	0.399	316	18.9778
KSP	250_S250ID Assembly Contig 2	0.399	316	24.9114
KSP	181_S181ID Assembly Contig 3	0.401	316	17.9937
KSP	133_S133ID Assembly Contig 2	0.403	316	11.9905
KSP	271_S271ID Assembly Contig 2	0.41	316	10
KSP	41_S41ID Assembly Contig 2	0.388	316	9
KSP	298_S298ID Assembly Contig 3	0.407	316	4
KSP	100_S100ID Assembly Contig 3	0.41	316	36.9589
KSP	194_S194ID Assembly Contig 2	0.405	316	12.9968
KSP	256_S256ID Assembly Contig 1	0.399	316	6.99684
KSP	309_S309ID Assembly Contig 2	0.395	316	5.97468
KSP	102_S102ID Assembly Contig 2	0.423	316	5
KSP	239_S239ID Assembly Contig 3	0.411	316	54.8987
KSP	56_S56ID Assembly Contig 2	0.394	316	7
KSP	29_S29ID Assembly Contig 4	0.402	316	39.9367
KSP	151_S151ID Assembly Contig 4	0.399	316	14.9968
KSP	107_S107ID Assembly Contig 3	0.399	316	4.99367
KSP	37_S37ID Assembly Contig 3	0.409	316	27.9652
KSP	123_S123ID Assembly Contig 2	0.387	315	6.99683
KSP	282_S282ID Assembly Contig 3	0.395	308	3
KSP	125_S125ID Assembly Contig 2	0.408	306	2.98693
KSP	34_S34ID Assembly Contig 2	0.402		3017.28
KSP	91_S91ID Assembly Contig 3	0.402		8760.36
KSP	69_S69ID Assembly Contig 3	0.413		1264.95
KSP	199_S199ID Assembly Contig 3	0.402		1932.71
KSP	202_S202ID Assembly Contig 2	0.402		14909.1
KSP	233_S233ID Assembly Contig 1	0.412		2426.95
KSP	340_S340ID Assembly Contig 2	0.403		1285.03
KSP	160_S160ID Assembly Contig 3	0.402		8426.81
KSP	261_S261ID Assembly Contig 2	0.413		1404.31
KSP	155_S155ID Assembly Contig 3	0.403		8437.49
KSP	117_S117ID Assembly Contig 2	0.413		1587.6
KSP	242_S242ID Assembly Contig 3	0.402		3182.11
KSP	335_S335ID Assembly Contig 3	0.402		6771.47
KSP	225_S225ID Assembly Contig 2	0.413		1241.78
KSP	186_S186ID Assembly Contig 2	0.402		10154.8
KSP	110_S110ID Assembly Contig 2	0.413		1885.46
KSP	43_S43ID Assembly Contig 2	0.402		1373.29
KSP	112_S112ID Assembly Contig 2	0.402		5604.64
KSP	158_S158ID Assembly Contig 2	0.402		1708.58
KSP	153_S153ID Assembly Contig 3	0.402		5467.47
MFRC	336_S336ID Assembly Contig 4	0.413	332	592.91
MFRC	145_S145ID Assembly Contig 4	0.413	329	614.559
MFRC	67_S67ID Assembly Contig 3	0.413	329	316.41
MFRC	216_S216ID Assembly Contig 3	0.413	328	475.326
MFRC	197_S197ID Assembly Contig 4	0.413	328	471.579
MFRC	177_S177ID Assembly Contig 1	0.403	325	846.246
MFRC	313_S313ID Assembly Contig 1	0.412	320	238.534
MFRC	100_S100ID Assembly Contig 5	0.413	317	125.836
MFRC	303_S303ID Assembly Contig 1	0.405	317	65.6183
MFRC	352_S352ID Assembly Contig 4	0.401	317	29.9022
MFRC	344_S344ID Assembly Contig 5	0.412	317	28.8297
MFRC	326_S326ID Assembly Contig 5	0.401	317	24.8864
MFRC	224_S224ID Assembly Contig 3	0.409	317	15.9464
MFRC	19_S19ID Assembly Contig 3	0.397	317	9.94637
MFRC	14_S14ID Assembly Contig 6	0.383	317	8.97161
MFRC	7_S7ID Assembly Contig 4	0.4	317	7.98738
MFRC	346_S346ID Assembly Contig 1	0.403	317	239.344
MFRC	374_S374ID Assembly Contig 1	0.411	317	60.8864
MFRC	244_S244ID Assembly Contig 1	0.414	317	7.98423
MFRC	354_S354ID Assembly Contig 8	0.416	317	6.95584
MFRC	76_S76ID Assembly Contig 5	0.401	316	4.99051
MFRC	21_S21ID Assembly Contig 4	0.413	316	10.981
MFRC	15_S15ID Assembly Contig 3	0.402	316	10.9652
MFRC	366_S366ID Assembly Contig 1	0.41	316	53.9146
MFRC	108_S108ID Assembly Contig 1	0.411	316	43.9399
MFRC	183_S183ID Assembly Contig 1	0.405	316	36.9684
MFRC	182_S182ID Assembly Contig 1	0.4	316	35.8892
MFRC	21_S21ID Assembly Contig 1	0.407	316	32.8639
MFRC	205_S205ID Assembly Contig 1	0.402	316	31.9114
MFRC	272_S272ID Assembly Contig 1	0.4	316	31.9304
MFRC	369_S369ID Assembly Contig 6	0.405	316	30.9873
MFRC	369_S369ID Assembly Contig 5	0.409	316	30.9146
MFRC	358_S358ID Assembly Contig 4	0.412	316	30.8987
MFRC	346_S346ID Assembly Contig 5	0.398	316	28.962
MFRC	346_S346ID Assembly Contig 4	0.4	316	28.962
MFRC	339_S339ID Assembly Contig 3	0.405	316	25.9525
MFRC	336_S336ID Assembly Contig 3	0.403	316	25.9557
MFRC	329_S329ID Assembly Contig 5	0.409	316	24.9873
MFRC	326_S326ID Assembly Contig 4	0.404	316	23.9747
MFRC	316_S316ID Assembly Contig 5	0.396	316	23.962
MFRC	316_S316ID Assembly Contig 4	0.404	316	23.943
MFRC	306_S306ID Assembly Contig 6	0.402	316	22.9937
MFRC	303_S303ID Assembly Contig 4	0.411	316	22.9652
MFRC	301_S301ID Assembly Contig 62	0.391	316	22.9209
MFRC	301_S301ID Assembly Contig 61	0.409	316	21.9778
MFRC	301_S301ID Assembly Contig 60	0.405	316	20.943
MFRC	283_S283ID Assembly Contig 3	0.402	316	19.9525
MFRC	252_S252ID Assembly Contig 9	0.401	316	19.9019
MFRC	252_S252ID Assembly Contig 8	0.41	316	18.9525
MFRC	252_S252ID Assembly Contig 7	0.398	316	18.9494
MFRC	246_S246ID Assembly Contig 6	0.405	316	18
MFRC	245_S245ID Assembly Contig 5	0.381	316	16.9715
MFRC	235_S235ID Assembly Contig 4	0.398	316	15.9684
MFRC	220_S220ID Assembly Contig 5	0.391	316	14.9778
MFRC	205_S205ID Assembly Contig 6	0.416	316	13.9525
MFRC	201_S201ID Assembly Contig 3	0.408	316	13.9873
MFRC	200_S200ID Assembly Contig 6	0.393	316	14
MFRC	157_S157ID Assembly Contig 4	0.385	316	12.9715
MFRC	152_S152ID Assembly Contig 4	0.396	316	12.9557
MFRC	151_S151ID Assembly Contig 6	0.4	316	12.9778
MFRC	145_S145ID Assembly Contig 5	0.412	316	12.962
MFRC	140_S140ID Assembly Contig 4	0.393	316	12.9905
MFRC	113_S113ID Assembly Contig 3	0.39	316	11.9905
MFRC	68_S68ID Assembly Contig 3	0.384	316	11.9715
MFRC	62_S62ID Assembly Contig 7	0.401	316	11
MFRC	62_S62ID Assembly Contig 6	0.395	316	10.9051
MFRC	61_S61ID Assembly Contig 3	0.401	316	10.9873
MFRC	37_S37ID Assembly Contig 6	0.395	316	10.9842
MFRC	28_S28ID Assembly Contig 6	0.4	316	10.9557
MFRC	16_S16ID Assembly Contig 4	0.413	316	8.9557
MFRC	9_S9ID Assembly Contig 5	0.402	316	8
MFRC	7_S7ID Assembly Contig 5	0.399	316	8
MFRC	39_S39ID Assembly Contig 1	0.409	316	7
MFRC	62_S62ID Assembly Contig 1	0.41	316	7
MFRC	165_S165ID Assembly Contig 1	0.421	316	6.91456
MFRC	295_S295ID Assembly Contig 1	0.399	316	6.97468
MFRC	30_S30ID Assembly Contig 1	0.414	316	5.99051
MFRC	361_S361ID Assembly Contig 1	0.408	316	5.98418
MFRC	341_S341ID Assembly Contig 1	0.403	316	6
MFRC	166_S166ID Assembly Contig 1	0.4	316	5.99051
MFRC	290_S290ID Assembly Contig 1	0.403	316	5.99051
MFRC	354_S354ID Assembly Contig 1	0.401	316	38.9937
MFRC	122_S122ID Assembly Contig 1	0.394	316	6.99367
MFRC	168_S168ID Assembly Contig 1	0.402	316	20.981
MFRC	372_S372ID Assembly Contig 9	0.404	316	12.9905
MFRC	372_S372ID Assembly Contig 8	0.395	316	11.9905
MFRC	371_S371ID Assembly Contig 5	0.416	316	9.95886
MFRC	371_S371ID Assembly Contig 4	0.394	316	9.97152
MFRC	368_S368ID Assembly Contig 4	0.4	316	8.96519
MFRC	365_S365ID Assembly Contig 4	0.406	316	7
MFRC	358_S358ID Assembly Contig 5	0.406	316	7
MFRC	352_S352ID Assembly Contig 5	0.406	316	6
MFRC	346_S346ID Assembly Contig 8	0.399	316	6
MFRC	346_S346ID Assembly Contig 7	0.388	316	6
MFRC	346_S346ID Assembly Contig 6	0.395	316	6
MFRC	341_S341ID Assembly Contig 4	0.399	316	4.97785
MFRC	338_S338ID Assembly Contig 4	0.399	316	4.99684
MFRC	330_S330ID Assembly Contig 4	0.404	316	5
MFRC	313_S313ID Assembly Contig 3	0.388	316	4.99367
MFRC	288_S288ID Assembly Contig 5	0.417	315	19.9841
MFRC	205_S205ID Assembly Contig 7	0.397	315	13.981
MFRC	159_S159ID Assembly Contig 3	0.382	315	13
MFRC	137_S137ID Assembly Contig 3	0.41	315	11.9841
MFRC	200_S200ID Assembly Contig 1	0.419	315	3
MFRC	343_S343ID Assembly Contig 7	0.419	315	4.98413
MFRC	200_S200ID Assembly Contig 5	0.403		1755.26
MFRC	183_S183ID Assembly Contig 6	0.403		2288.85
MFRC	74_S74ID Assembly Contig 5	0.403		3215.17
MFRC	60_S60ID Assembly Contig 4	0.402		1115.61
MFRC	14_S14ID Assembly Contig 5	0.403		7752.91
MFRC	4_S4ID Assembly Contig 5	0.413		1417.19
MFRC	351_S351ID Assembly Contig 1	0.403		1177.4
MFRC	269_S269ID Assembly Contig 1	0.403		8501.2
MFRC	16_S16ID Assembly Contig 1	0.413		1915.75
MFRC	73_S73ID Assembly Contig 1	0.402		14409.6
MFRC	338_S338ID Assembly Contig 3	0.413		3082.12
MFRC	312_S312ID Assembly Contig 4	0.403		3030.75
SSD	186_S186ID Assembly Contig 1	0.412	329	607.979
SSD	224_S224ID Assembly Contig 2	0.402	328	627.061
SSD	235_S235ID Assembly Contig 2	0.402	327	821
SSD	11_S11ID Assembly Contig 1	0.412	326	204.365
SSD	191_S191ID Assembly Contig 2	0.402	326	892.571
SSD	123_S123ID Assembly Contig 1	0.413	324	412.259
SSD	318_S318ID Assembly Contig 2	0.412	323	328.421
SSD	283_S283ID Assembly Contig 2	0.412	323	424.542
SSD	25_S25ID Assembly Contig 1	0.412	322	565.801
SSD	112_S112ID Assembly Contig 1	0.414	321	154.492
SSD	301_S301ID Assembly Contig 1	0.413	320	109.397
SSD	59_S59ID Assembly Contig 2	0.401	320	311.1
SSD	376_S376ID Assembly Contig 2	0.412	318	44.9025
SSD	99_S99ID Assembly Contig 2	0.413	318	125.811
SSD	228_S228ID Assembly Contig 2	0.411	317	93.7571
SSD	359_S359ID Assembly Contig 2	0.413	317	142.476
SSD	365_S365ID Assembly Contig 2	0.412	317	99.9085
SSD	56_S56ID Assembly Contig 1	0.411	317	46.776
SSD	75_S75ID Assembly Contig 2	0.401	317	181.451
SSD	356_S356ID Assembly Contig 2	0.402	317	90.8864
SSD	217_S217ID Assembly Contig 1	0.41	316	11
SSD	261_S261ID Assembly Contig 1	0.412	316	47.7975
SSD	293_S293ID Assembly Contig 2	0.411	316	29.9589
SSD	355_S355ID Assembly Contig 2	0.403	316	88.8196
SSD	346_S346ID Assembly Contig 2	0.403	316	7.98418
SSD	366_S366ID Assembly Contig 2	0.404	316	36.9652
SSD	278_S278ID Assembly Contig 1	0.412	316	32.9272
SSD	229_S229ID Assembly Contig 2	0.411	316	10.9367
SSD	125_S125ID Assembly Contig 1	0.413	316	34.9241
SSD	94_S94ID Assembly Contig 1	0.398	316	20.981
SSD	360_S360ID Assembly Contig 2	0.404	316	4.98734
SSD	213_S213ID Assembly Contig 2	0.413	316	19.9241
SSD	281_S281ID Assembly Contig 2	0.623	296	1.98986
SSD	367_S367ID Assembly Contig 2	0.402		2629.87
SSD	142_S142ID Assembly Contig 2	0.402		6577.27
SSD	289_S289ID Assembly Contig 2	0.412		1311.93
SSD	154_S154ID Assembly Contig 2	0.402		1866.56
SSD	103_S103ID Assembly Contig 1	0.402		1613.04
SSD	158_S158ID Assembly Contig 1	0.402		8321.09
SSD	284_S284ID Assembly Contig 1	0.412		1535.03
SSD	225_S225ID Assembly Contig 1	0.402		2410.87
SSD	195_S195ID Assembly Contig 1	0.402		6372.9
SSD	308_S308ID Assembly Contig 2	0.412		1216.36
SSD	216_S216ID Assembly Contig 2	0.402		3338.09
SSD	67_S67ID Assembly Contig 2	0.402		992.085
SSD	41_S41ID Assembly Contig 1	0.402		2443.38
SSD	266_S266ID Assembly Contig 2	0.402		1069.36
SSD	124_S124ID Assembly Contig 2	0.402		5879.31
SSD	43_S43ID Assembly Contig 1	0.412		1377.27
SSD	87_S87ID Assembly Contig 1	0.402		9260.6
SSD	294_S294ID Assembly Contig 2	0.412		1635.76
SY	37_S37ID Assembly Contig 2	0.413	339	707.646
SY	71_S71ID Assembly Contig 2	0.412	328	905.091
SY	260_S260ID Assembly Contig 2	0.412	327	398.685
SY	84_S84ID Assembly Contig 2	0.412	327	893.85
SY	192_S192ID Assembly Contig 2	0.412	324	373.272
SY	361_S361ID Assembly Contig 3	0.412	324	361.318
SY	322_S322ID Assembly Contig 2	0.402	323	528.969
SY	227_S227ID Assembly Contig 2	0.412	322	384.093
SY	255_S255ID Assembly Contig 1	0.413	321	608.212
SY	230_S230ID Assembly Contig 2	0.409	321	99.785
SY	351_S351ID Assembly Contig 3	0.412	320	275.616
SY	153_S153ID Assembly Contig 2	0.413	320	68.9313
SY	332_S332ID Assembly Contig 1	0.402	320	396.812
SY	307_S307ID Assembly Contig 2	0.411	320	128.728
SY	178_S178ID Assembly Contig 2	0.4	319	13.9843
SY	79_S79ID Assembly Contig 2	0.413	319	295.708
SY	15_S15ID Assembly Contig 2	0.415	319	57.9248
SY	38_S38ID Assembly Contig 2	0.412	318	103.84
SY	86_S86ID Assembly Contig 2	0.412	317	4.99369
SY	156_S156ID Assembly Contig 2	0.414	317	25.8612
SY	285_S285ID Assembly Contig 2	0.401	317	13
SY	159_S159ID Assembly Contig 2	0.399	317	40.8076
SY	236_S236ID Assembly Contig 2	0.405	317	5
SY	219_S219ID Assembly Contig 2	0.402	316	19.9968
SY	12_S12ID Assembly Contig 2	0.394	316	22.9873
SY	348_S348ID Assembly Contig 3	0.401	316	14.9747
SY	40_S40ID Assembly Contig 2	0.401	316	11.9968
SY	311_S311ID Assembly Contig 2	0.411	316	7
SY	366_S366ID Assembly Contig 3	0.414	316	5.98418
SY	248_S248ID Assembly Contig 2	0.424	316	8.99684
SY	115_S115ID Assembly Contig 2	0.4	316	7.99367
SY	173_S173ID Assembly Contig 2	0.414	316	42.9051
SY	259_S259ID Assembly Contig 2	0.394	316	15.9842
SY	241_S241ID Assembly Contig 1	0.393	316	6.99684
SY	104_S104ID Assembly Contig 2	0.399	316	7
SY	149_S149ID Assembly Contig 1	0.403	316	59.8228
SY	52_S52ID Assembly Contig 2	0.411	316	29.8892
SY	170_S170ID Assembly Contig 2	0.413	316	47.7532
SY	234_S234ID Assembly Contig 2	0.414	316	6.98734
SY	155_S155ID Assembly Contig 2	0.399	316	7.96835
SY	31_S31ID Assembly Contig 2	0.394	316	5.97152
SY	354_S354ID Assembly Contig 3	0.4	316	7.99684
SY	175_S175ID Assembly Contig 1	0.414	316	5.98101
SY	77_S77ID Assembly Contig 2	0.414	316	5.99051
SY	221_S221ID Assembly Contig 2	0.42	316	3.99051
SY	239_S239ID Assembly Contig 2	0.411	316	94.7563
SY	100_S100ID Assembly Contig 2	0.396	316	11
SY	324_S324ID Assembly Contig 1	0.402		5114.19
SY	132_S132ID Assembly Contig 2	0.402		6873.07
SY	231_S231ID Assembly Contig 1	0.413		1445.31
SY	204_S204ID Assembly Contig 2	0.403		4136.93
SY	196_S196ID Assembly Contig 2	0.402		5145.36
SY	367_S367ID Assembly Contig 3	0.402		2062.1
SY	342_S342ID Assembly Contig 2	0.402		6015.57
SY	334_S334ID Assembly Contig 2	0.413		1111
SY	151_S151ID Assembly Contig 2	0.402		1493.12
SY	46_S46ID Assembly Contig 2	0.401		3120.81
SY	328_S328ID Assembly Contig 2	0.401		6165.89
SY	106_S106ID Assembly Contig 2	0.412		1369.61
SY	47_S47ID Assembly Contig 2	0.401		2774.78
SY	299_S299ID Assembly Contig 2	0.401		4867.1
SY	116_S116ID Assembly Contig 1	0.402		2868.88
WHM	20_S20ID Assembly Contig 1	0.413	330	978.055
WHM	66_S66ID Assembly Contig 1	0.413	329	578.541
WHM	61_S61ID Assembly Contig 2	0.413	328	243.284
WHM	45_S45ID Assembly Contig 2	0.414	328	454.716
WHM	57_S57ID Assembly Contig 1	0.413	328	972.872
WHM	147_S147ID Assembly Contig 2	0.403	326	740.248
WHM	111_S111ID Assembly Contig 2	0.402	325	742.938
WHM	78_S78ID Assembly Contig 2	0.413	324	663.29
WHM	214_S214ID Assembly Contig 2	0.412	324	87.9321
WHM	177_S177ID Assembly Contig 2	0.412	322	321.379
WHM	36_S36ID Assembly Contig 2	0.413	322	552.326
WHM	152_S152ID Assembly Contig 2	0.412	321	384.427
WHM	80_S80ID Assembly Contig 1	0.413	321	512.414
WHM	136_S136ID Assembly Contig 2	0.401	321	531.399
WHM	339_S339ID Assembly Contig 2	0.402	321	230.449
WHM	168_S168ID Assembly Contig 2	0.414	320	91.6281
WHM	300_S300ID Assembly Contig 1	0.411	319	79.815
WHM	299_S299ID Assembly Contig 1	0.413	319	153.702
WHM	377_S377ID Assembly Contig 2	0.415	318	97.6572
WHM	126_S126ID Assembly Contig 1	0.403	318	167.535
WHM	137_S137ID Assembly Contig 2	0.402	317	5.98423
WHM	42_S42ID Assembly Contig 2	0.412	317	84.7035
WHM	306_S306ID Assembly Contig 2	0.412	317	125.716
WHM	310_S310ID Assembly Contig 1	0.413	317	210.776
WHM	139_S139ID Assembly Contig 1	0.413	317	153.817
WHM	65_S65ID Assembly Contig 2	0.402	317	85.7445
WHM	363_S363ID Assembly Contig 2	0.415	317	39.7697
WHM	101_S101ID Assembly Contig 2	0.411	317	47.8549
WHM	250_S250ID Assembly Contig 1	0.403	317	16.9842
WHM	35_S35ID Assembly Contig 2	0.402	316	7
WHM	181_S181ID Assembly Contig 1	0.401	316	17.9968
WHM	206_S206ID Assembly Contig 2	0.406	316	9.98734
WHM	34_S34ID Assembly Contig 1	0.399	316	14.9873
WHM	188_S188ID Assembly Contig 2	0.409	316	7
WHM	13_S13ID Assembly Contig 2	0.412	316	34.9304
WHM	351_S351ID Assembly Contig 2	0.408	316	4
WHM	353_S353ID Assembly Contig 2	0.41	316	38.8892
WHM	172_S172ID Assembly Contig 1	0.41	316	31.9557
WHM	24_S24ID Assembly Contig 1	0.41	316	60.7753
WHM	223_S223ID Assembly Contig 2	0.401	316	6.99684
WHM	54_S54ID Assembly Contig 1	0.402	316	4.99051
WHM	119_S119ID Assembly Contig 2	0.41	304	2
WHM	73_S73ID Assembly Contig 2	0.601	296	2.97973
WHM	340_S340ID Assembly Contig 1	0.623	296	2.98311
WHM	190_S190ID Assembly Contig 1	0.403		6202.87
WHM	348_S348ID Assembly Contig 2	0.413		1317.45
WHM	165_S165ID Assembly Contig 2	0.402		1947.84
WHM	105_S105ID Assembly Contig 2	0.402		1293.38
WHM	18_S18ID Assembly Contig 1	0.403		3118.34
WHM	166_S166ID Assembly Contig 2	0.403		2534.39
WHM	330_S330ID Assembly Contig 1	0.403		5656.45
WHM	251_S251ID Assembly Contig 2	0.413		1153.03
WHM	344_S344ID Assembly Contig 2	0.402		1604.56
WHM	133_S133ID Assembly Contig 1	0.403		4769.5
WHM	249_S249ID Assembly Contig 2	0.403		3009.54
WHM	218_S218ID Assembly Contig 1	0.403		5219.08
WHM	201_S201ID Assembly Contig 2	0.403		1571.73
WHM	83_S83ID Assembly Contig 2	0.403		2618.98
WHM	274_S274ID Assembly Contig 2	0.403		3290.12
WHM	336_S336ID Assembly Contig 2	0.402		1029.73
WHM	117_S117ID Assembly Contig 1	0.402		6434.23
WHM	326_S326ID Assembly Contig 2	0.412		1375.71
WKH	356_S356ID Assembly Contig 1	0.413	351	823.325
WKH	39_S39ID Assembly Contig 10	0.414	340	845.094
WKH	99_S99ID Assembly Contig 1	0.414	337	696.341
WKH	294_S294ID Assembly Contig 8	0.413	335	672.866
WKH	370_S370ID Assembly Contig 6	0.414	334	901.563
WKH	281_S281ID Assembly Contig 1	0.414	333	787.541
WKH	81_S81ID Assembly Contig 1	0.413	333	965.336
WKH	315_S315ID Assembly	0.413	332	724.976
WKH	98_S98ID Assembly Contig 1	0.413	332	831.681
WKH	369_S369ID Assembly Contig 2	0.411	330	307.536
WKH	216_S216ID Assembly Contig 1	0.413	328	433.957
WKH	32_S32ID Assembly Contig 1	0.412	326	512.911
WKH	124_S124ID Assembly Contig 1	0.407	324	2
WKH	321_S321ID Assembly Contig 1	0.412	323	690.102
WKH	275_S275ID Assembly Contig 1	0.417	322	1.93478
WKH	60_S60ID Assembly Contig 1	0.412	321	306.978
WKH	134_S134ID Assembly Contig 1	0.412	320	283.725
WKH	226_S226ID Assembly Contig 1	0.412	320	214.012
WKH	368_S368ID Assembly Contig 5	0.412	320	411.262
WKH	39_S39ID Assembly Contig 9	0.412	319	276.241
WKH	294_S294ID Assembly Contig 7	0.412	319	286.743
WKH	289_S289ID Assembly Contig 1	0.416	318	75.6918
WKH	144_S144ID Assembly Contig 1	0.41	317	3
WKH	260_S260ID Assembly Contig 5	0.376	317	3.90536
WKH	16_S16ID Assembly Contig 7	0.399	316	20.6076
WKH	154_S154ID Assembly Contig 1	0.404	316	4.86076
WKH	5_S5ID Assembly Contig 1	0.398	316	5.98734
WKH	132_S132ID Assembly Contig 1	0.399	316	2.95253
WKH	213_S213ID Assembly Contig 1	0.399	316	6.88608
WKH	22_S22ID Assembly Contig 1	0.394	316	8.81329
WKH	370_S370ID Assembly Contig 7	0.404	316	5.93038
WKH	357_S357ID Assembly Contig 6	0.405	316	11.6108
WKH	354_S354ID Assembly Contig 9	0.404	316	11.6519
WKH	348_S348ID Assembly Contig 5	0.409	316	5.87975
WKH	347_S347ID Assembly Contig 3	0.417	316	4.87658
WKH	294_S294ID Assembly Contig 6	0.402	316	6.93038
WKH	260_S260ID Assembly Contig 4	0.399	316	35.9494
WKH	252_S252ID Assembly Contig 13	0.403	316	15.9842
WKH	212_S212ID Assembly Contig 8	0.418	316	7.98734
WKH	178_S178ID Assembly Contig 3	0.403	316	6
WKH	152_S152ID Assembly Contig 8	0.406	316	5.99051
WKH	88_S88ID Assembly Contig 3	0.394	316	4.99051
WKH	128_S128ID Assembly Contig 1	0.415	316	6
WKH	197_S197ID Assembly Contig 1	0.412	316	5.99367
WKH	222_S222ID Assembly Contig 1	0.391	316	3.99367
WKH	69_S69ID Assembly Contig 1	0.389	316	3.99684
WKH	59_S59ID Assembly Contig 1	0.405	316	17.9873
WKH	245_S245ID Assembly Contig 1	0.399	316	7
WKH	174_S174ID Assembly Contig 1	0.391	316	7
WKH	160_S160ID Assembly Contig 1	0.394	316	5.9557
WKH	53_S53ID Assembly Contig 1	0.4	316	4.98734
WKH	331_S331ID Assembly Contig 1	0.402	316	36.8892
WKH	219_S219ID Assembly Contig 1	0.401	316	21.962
WKH	9_S9ID Assembly Contig 1	0.398	316	13.9905
WKH	44_S44ID Assembly Contig 1	0.397	316	11.9937
WKH	314_S314ID Assembly Contig 1	0.404	316	8.99367
WKH	337_S337ID Assembly Contig 1	0.411	316	6.99367
WKH	372_S372ID Assembly Contig 2	0.404	316	6.99684
WKH	113_S113ID Assembly Contig 1	0.411	316	6
WKH	51_S51ID Assembly Contig 1	0.422	316	5
WKH	345_S345ID Assembly Contig 1	0.397	316	10.9937
WKH	298_S298ID Assembly Contig 1	0.403	316	8.99367
WKH	184_S184ID Assembly Contig 1	0.403	316	5
WKH	151_S151ID Assembly Contig 1	0.399	316	15.9842
WKH	320_S320ID Assembly Contig 1	0.4	316	11.9937
WKH	204_S204ID Assembly Contig 1	0.399	316	3.99684
WKH	224_S224ID Assembly Contig 4	0.397	315	7.9873
WKH	183_S183ID Assembly Contig 7	0.412	315	5.99048
WKH	7_S7ID Assembly Contig 1	0.404	305	3
WKH	173_S173ID Assembly Contig 1	0.396	305	2
WKH	365_S365ID Assembly Contig 1	0.401	298	2
WKH	294_S294ID Assembly Contig 1	0.615	296	2
WKH	220_S220ID Assembly Contig 1	0.601	294	1.9932
WKH	375_S375ID Assembly Contig 1	0.402		6158.5
WKH	370_S370ID Assembly Contig 1	0.402		3841.83
WKH	29_S29ID Assembly Contig 1	0.402		7633.22
WKH	308_S308ID Assembly Contig 1	0.413		1141.04
WKH	288_S288ID Assembly Contig 1	0.403		11233.6
WKH	329_S329ID Assembly Contig 1	0.413		1690.29
WKH	327_S327ID Assembly Contig 1	0.403		5160.99
WKH	283_S283ID Assembly Contig 1	0.414		1070.93
WKH	67_S67ID Assembly Contig 1	0.403		5365.06
WKH	167_S167ID Assembly Contig 1	0.403		4447.7
WKH	377_S377ID Assembly Contig 4	0.403		8340.14
WKH	349_S349ID Assembly Contig 5	0.402		6644.78
WKH	288_S288ID Assembly Contig 6	0.403		6453.65
WKH	239_S239ID Assembly Contig 6	0.402		15798.1
WKH	42_S42ID Assembly Contig 4	0.412		3960.27
WKH	360_S360ID Assembly Contig 1	0.402		4643.62
WKH	247_S247ID Assembly Contig 1	0.401		11792.1
WKH	292_S292ID Assembly Contig 1	0.411		2644.88
WKH	161_S161ID Assembly Contig 1	0.401		16220.2
WKH	253_S253ID Assembly Contig 1	0.412		3357.81
WKH	91_S91ID Assembly Contig 1	0.402		2437.13
WKH	293_S293ID Assembly Contig 1	0.403		7433.09
WKH	257_S257ID Assembly Contig 1	0.413		1653.8
WKH	63_S63ID Assembly Contig 1	0.403		4954.47
WKH	291_S291ID Assembly Contig 1	0.403		4725.84
WKH	304_S304ID Assembly Contig 2	0.402		6032.06
WKH	305_S305ID Assembly Contig 1	0.413		1091.22
WKT	352_S352ID Assembly Contig 3	0.412	343	846.149
WKT	228_S228ID Assembly Contig 3	0.413	337	898.338
WKT	341_S341ID Assembly Contig 3	0.413	336	724.357
WKT	219_S219ID Assembly Contig 4	0.402	333	934.709
WKT	304_S304ID Assembly Contig 6	0.413	333	649.258
WKT	211_S211ID Assembly Contig 1	0.412	333	718.441
WKT	301_S301ID Assembly Contig 53	0.412	331	969.082
WKT	39_S39ID Assembly Contig 5	0.402	331	864.366
WKT	28_S28ID Assembly Contig 4	0.412	329	383.38
WKT	131_S131ID Assembly Contig 3	0.403	328	797.277
WKT	108_S108ID Assembly Contig 3	0.412	328	806.162
WKT	189_S189ID Assembly Contig 1	0.402	328	487.579
WKT	171_S171ID Assembly Contig 2	0.402	324	303.228
WKT	306_S306ID Assembly Contig 5	0.414	323	142.576
WKT	267_S267ID Assembly Contig 4	0.412	322	813.919
WKT	316_S316ID Assembly Contig 1	0.402	322	504.047
WKT	211_S211ID Assembly Contig 4	0.413	321	174.664
WKT	205_S205ID Assembly Contig 5	0.413	320	151.812
WKT	116_S116ID Assembly Contig 4	0.41	320	58.9406
WKT	143_S143ID Assembly Contig 5	0.403	319	42.9122
WKT	154_S154ID Assembly Contig 3	0.402	319	120.887
WKT	357_S357ID Assembly Contig 4	0.413	319	73.7273
WKT	206_S206ID Assembly Contig 4	0.411	318	45.8994
WKT	36_S36ID Assembly Contig 5	0.401	318	82.6887
WKT	30_S30ID Assembly Contig 4	0.411	318	94.7862
WKT	26_S26ID Assembly Contig 3	0.412	318	56.9277
WKT	76_S76ID Assembly Contig 1	0.413	318	235.997
WKT	243_S243ID Assembly Contig 1	0.413	318	202.119
WKT	100_S100ID Assembly Contig 4	0.412	317	79.8486
WKT	62_S62ID Assembly Contig 4	0.412	317	40.8454
WKT	200_S200ID Assembly Contig 4	0.405	317	136.811
WKT	30_S30ID Assembly Contig 3	0.411	317	40.8991
WKT	131_S131ID Assembly Contig 1	0.412	317	85.8391
WKT	17_S17ID Assembly Contig 1	0.41	317	36.9779
WKT	314_S314ID Assembly Contig 3	0.403	317	52.8107
WKT	35_S35ID Assembly Contig 3	0.402	317	26.9558
WKT	166_S166ID Assembly Contig 3	0.41	316	56.8386
WKT	13_S13ID Assembly Contig 3	0.411	316	20.962
WKT	4_S4ID Assembly Contig 4	0.402	316	9.99684
WKT	246_S246ID Assembly Contig 4	0.399	316	8.99684
WKT	62_S62ID Assembly Contig 5	0.402	316	7.99684
WKT	304_S304ID Assembly Contig 7	0.414	316	16.9873
WKT	301_S301ID Assembly Contig 57	0.412	316	169.864
WKT	291_S291ID Assembly Contig 3	0.396	316	14.9873
WKT	279_S279ID Assembly Contig 3	0.403	316	7.91139
WKT	225_S225ID Assembly Contig 4	0.404	316	15.9937
WKT	220_S220ID Assembly Contig 3	0.398	316	6.98101
WKT	14_S14ID Assembly Contig 4	0.401	316	6.99684
WKT	350_S350ID Assembly Contig 1	0.395	316	6
WKT	358_S358ID Assembly Contig 1	0.404	316	5.98734
WKT	28_S28ID Assembly Contig 1	0.41	316	4.97468
WKT	203_S203ID Assembly Contig 1	0.399	316	9.99051
WKT	374_S374ID Assembly Contig 4	0.415	316	27.9937
WKT	372_S372ID Assembly Contig 7	0.399	316	6
WKT	351_S351ID Assembly Contig 5	0.399	316	5.98418
WKT	304_S304ID Assembly Contig 8	0.398	316	6.98418
WKT	252_S252ID Assembly Contig 4	0.398	316	15.9747
WKT	251_S251ID Assembly Contig 3	0.405	316	11.9589
WKT	235_S235ID Assembly Contig 3	0.409	316	6.99051
WKT	240_S240ID Assembly Contig 4	0.41	315	4
WKT	358_S358ID Assembly Contig 3	0.403	315	3
WKT	252_S252ID Assembly Contig 5	0.399	303	4
WKT	301_S301ID Assembly Contig 59	0.62	296	5.93581
WKT	281_S281ID Assembly Contig 3	0.61	296	3.96284
WKT	252_S252ID Assembly Contig 6	0.604	296	3.97973
WKT	183_S183ID Assembly Contig 4	0.402		1034.6
WKT	301_S301ID Assembly Contig 52	0.402		4999.44
WKT	243_S243ID Assembly Contig 5	0.402		4049.26
WKT	48_S48ID Assembly Contig 3	0.402		4304.77
WKT	16_S16ID Assembly Contig 3	0.402		2037.81
WKT	246_S246ID Assembly Contig 5	0.403		4546.27
WKT	183_S183ID Assembly Contig 5	0.402		4235.86
WKT	17_S17ID Assembly Contig 3	0.402		7565.22
WKT	212_S212ID Assembly Contig 1	0.412		1416.36
WKT	120_S120ID Assembly Contig 1	0.402		3088.28
WKT	366_S366ID Assembly Contig 4	0.402		3676.6
WKT	348_S348ID Assembly Contig 4	0.402		3207.83
WKT	301_S301ID Assembly Contig 58	0.403		4578.2
WKT	239_S239ID Assembly Contig 5	0.402		7781.16
WKT	220_S220ID Assembly Contig 4	0.413		1511.01
WPN	271_S271ID Assembly Contig 1	0.401	340	989.129
WPN	319_S319ID Assembly Contig 1	0.412	332	787.389
WPN	282_S282ID Assembly Contig 1	0.401	331	889.344
WPN	280_S280ID Assembly Contig 2	0.412	325	318.182
WPN	5_S5ID Assembly Contig 2	0.411	322	203.363
WPN	238_S238ID Assembly Contig 1	0.413	320	525.016
WPN	273_S273ID Assembly Contig 1	0.403	318	11.9906
WPN	162_S162ID Assembly Contig 1	0.411	318	38.8836
WPN	198_S198ID Assembly Contig 2	0.415	317	118.767
WPN	375_S375ID Assembly Contig 2	0.404	316	8.97785
WPN	129_S129ID Assembly Contig 2	0.402	316	6.99684
WPN	193_S193ID Assembly Contig 2	0.395	316	5.99684
WPN	354_S354ID Assembly Contig 2	0.392	316	5.99051
WPN	327_S327ID Assembly Contig 2	0.411	316	110.785
WPN	4_S4ID Assembly Contig 2	0.411	316	32.9684
WPN	179_S179ID Assembly Contig 1	0.407	316	6
WPN	276_S276ID Assembly Contig 1	0.403	316	17.9715
WPN	93_S93ID Assembly Contig 1	0.407	316	4.96835
WPN	64_S64ID Assembly Contig 1	0.392	316	4.93671
WPN	114_S114ID Assembly Contig 1	0.403	306	2
WPN	194_S194ID Assembly Contig 1	0.402		2151.4
WPN	265_S265ID Assembly Contig 1	0.403		5127.14
WPN	19_S19ID Assembly Contig 2	0.413		1086.48
WPN	1_S1ID Assembly Contig 1	0.402		3095.98
WPN	232_S232ID Assembly Contig 1	0.402		4248.46
WPT	197_S197ID Assembly Contig 3	0.403	336	860.512
WPT	371_S371ID Assembly Contig 3	0.412	335	696.821
WPT	301_S301ID Assembly Contig 12	0.412	332	889.244
WPT	258_S258ID Assembly Contig 3	0.412	331	388.363
WPT	163_S163ID Assembly Contig 5	0.402	331	635.807
WPT	369_S369ID Assembly Contig 1	0.403	331	433.737
WPT	25_S25ID Assembly Contig 3	0.413	330	850.079
WPT	319_S319ID Assembly Contig 3	0.413	329	821.666
WPT	215_S215ID Assembly Contig 3	0.413	329	793.805
WPT	301_S301ID Assembly Contig 20	0.412	329	643.781
WPT	133_S133ID Assembly Contig 3	0.402	328	877.122
WPT	301_S301ID Assembly Contig 8	0.413	328	697.738
WPT	185_S185ID Assembly Contig 2	0.413	327	161.645
WPT	139_S139ID Assembly Contig 3	0.412	327	698.746
WPT	73_S73ID Assembly Contig 3	0.402	326	488.994
WPT	186_S186ID Assembly Contig 3	0.413	325	469.037
WPT	110_S110ID Assembly Contig 3	0.413	325	364.117
WPT	311_S311ID Assembly Contig 3	0.401	325	413.369
WPT	142_S142ID Assembly Contig 3	0.412	325	513.418
WPT	353_S353ID Assembly Contig 4	0.413	324	462.565
WPT	149_S149ID Assembly Contig 3	0.412	324	335.333
WPT	116_S116ID Assembly Contig 3	0.412	323	114.712
WPT	36_S36ID Assembly Contig 3	0.412	323	422.399
WPT	301_S301ID Assembly Contig 14	0.402	323	439.022
WPT	205_S205ID Assembly Contig 4	0.413	323	425.229
WPT	243_S243ID Assembly Contig 4	0.412	323	537.625
WPT	41_S41ID Assembly Contig 4	0.411	322	335.32
WPT	116_S116ID Assembly Contig 2	0.411	322	200.637
WPT	243_S243ID Assembly Contig 3	0.411	322	837.199
WPT	64_S64ID Assembly Contig 3	0.412	321	107.804
WPT	301_S301ID Assembly Contig 23	0.413	321	146.745
WPT	264_S264ID Assembly Contig 3	0.413	321	327.664
WPT	309_S309ID Assembly Contig 4	0.411	320	179.816
WPT	301_S301ID Assembly Contig 27	0.412	320	83.75
WPT	209_S209ID Assembly Contig 3	0.413	320	171.838
WPT	272_S272ID Assembly Contig 3	0.411	319	228.583
WPT	194_S194ID Assembly Contig 3	0.412	319	175.426
WPT	65_S65ID Assembly Contig 3	0.412	319	104.495
WPT	372_S372ID Assembly Contig 3	0.412	318	138.667
WPT	301_S301ID Assembly Contig 22	0.412	318	50.8868
WPT	163_S163ID Assembly Contig 4	0.415	318	76.934
WPT	121_S121ID Assembly Contig 2	0.411	318	160.664
WPT	140_S140ID Assembly Contig 3	0.414	318	66.934
WPT	45_S45ID Assembly Contig 3	0.412	318	65.9088
WPT	146_S146ID Assembly Contig 3	0.411	317	53.9464
WPT	301_S301ID Assembly Contig 5	0.413	317	46.8738
WPT	158_S158ID Assembly Contig 3	0.398	317	13.9842
WPT	102_S102ID Assembly Contig 3	0.41	317	36.9842
WPT	241_S241ID Assembly Contig 5	0.402	317	61.7823
WPT	50_S50ID Assembly Contig 3	0.414	317	21.9621
WPT	290_S290ID Assembly Contig 3	0.401	317	136.647
WPT	231_S231ID Assembly Contig 5	0.401	317	46.7886
WPT	359_S359ID Assembly Contig 4	0.412	317	123.868
WPT	317_S317ID Assembly Contig 3	0.399	317	25.9085
WPT	301_S301ID Assembly Contig 28	0.402	317	10.9874
WPT	301_S301ID Assembly Contig 32	0.403	317	10.9558
WPT	164_S164ID Assembly Contig 2	0.413	317	133.669
WPT	306_S306ID Assembly Contig 4	0.404	317	7.97792
WPT	246_S246ID Assembly Contig 1	0.412	317	22.9653
WPT	301_S301ID Assembly Contig 4	0.399	316	8.99367
WPT	277_S277ID Assembly Contig 3	0.412	316	31.9873
WPT	284_S284ID Assembly Contig 3	0.396	316	11
WPT	103_S103ID Assembly Contig 3	0.397	316	9.98418
WPT	92_S92ID Assembly Contig 4	0.393	316	8.99367
WPT	230_S230ID Assembly Contig 3	0.401	316	7.98734
WPT	195_S195ID Assembly Contig 4	0.403	316	5
WPT	286_S286ID Assembly Contig 3	0.401	316	5.98734
WPT	369_S369ID Assembly Contig 3	0.402	316	12.943
WPT	301_S301ID Assembly Contig 6	0.395	316	6.97785
WPT	172_S172ID Assembly Contig 3	0.384	316	5
WPT	133_S133ID Assembly Contig 4	0.396	316	7
WPT	343_S343ID Assembly Contig 3	0.407	316	7.99051
WPT	301_S301ID Assembly Contig 7	0.401	316	3.98734
WPT	301_S301ID Assembly Contig 9	0.408	316	10
WPT	232_S232ID Assembly Contig 3	0.4	316	20.9842
WPT	217_S217ID Assembly Contig 3	0.397	316	13.9905
WPT	301_S301ID Assembly Contig 11	0.396	316	9.99684
WPT	301_S301ID Assembly Contig 10	0.394	316	6.95253
WPT	325_S325ID Assembly	0.41	316	37.8797
WPT	301_S301ID Assembly Contig 16	0.399	316	22.9525
WPT	261_S261ID Assembly Contig 3	0.412	316	64.8196
WPT	58_S58ID Assembly Contig 4	0.405	316	52.8513
WPT	292_S292ID Assembly Contig 4	0.406	316	6.99684
WPT	175_S175ID Assembly Contig 4	0.411	316	31.9462
WPT	263_S263ID Assembly Contig 3	0.412	316	22.9747
WPT	301_S301ID Assembly Contig 18	0.411	316	75.8418
WPT	205_S205ID Assembly Contig 3	0.396	316	9
WPT	198_S198ID Assembly Contig 3	0.404	316	7.97152
WPT	343_S343ID Assembly Contig 4	0.403	316	15
WPT	301_S301ID Assembly Contig 19	0.411	316	160.778
WPT	210_S210ID Assembly Contig 2	0.398	316	16.9873
WPT	182_S182ID Assembly Contig 3	0.392	316	4.98418
WPT	343_S343ID Assembly Contig 5	0.397	316	11.9937
WPT	301_S301ID Assembly Contig 26	0.408	316	8.99051
WPT	301_S301ID Assembly Contig 25	0.407	316	4
WPT	143_S143ID Assembly Contig 3	0.412	316	18.981
WPT	372_S372ID Assembly Contig 4	0.414	316	9.99684
WPT	254_S254ID Assembly Contig 3	0.402	316	53.7848
WPT	211_S211ID Assembly Contig 3	0.41	316	28.9146
WPT	304_S304ID Assembly Contig 3	0.397	316	15.9241
WPT	226_S226ID Assembly Contig 4	0.382	316	5.98101
WPT	120_S120ID Assembly Contig 3	0.395	316	5.98418
WPT	39_S39ID Assembly Contig 4	0.401	316	11.9842
WPT	36_S36ID Assembly Contig 4	0.404	316	6.96203
WPT	301_S301ID Assembly Contig 31	0.397	316	6.98734
WPT	301_S301ID Assembly Contig 30	0.405	316	5
WPT	301_S301ID Assembly Contig 29	0.401	316	5
WPT	74_S74ID Assembly Contig 3	0.398	316	11.9367
WPT	44_S44ID Assembly Contig 3	0.395	316	7.97468
WPT	301_S301ID Assembly Contig 33	0.391	316	14
WPT	240_S240ID Assembly Contig 3	0.398	316	10
WPT	180_S180ID Assembly Contig 5	0.415	316	7.97152
WPT	180_S180ID Assembly Contig 4	0.412	316	5.98418
WPT	183_S183ID Assembly Contig 3	0.385	316	6
WPT	99_S99ID Assembly Contig 3	0.399	316	5.99051
WPT	135_S135ID Assembly Contig 3	0.404	316	8.99367
WPT	49_S49ID Assembly Contig 2	0.403	316	5
WPT	252_S252ID Assembly Contig 1	0.401	316	14.9842
WPT	372_S372ID Assembly Contig 1	0.398	316	8.99684
WPT	375_S375ID Assembly Contig 3	0.404	316	8.99684
WPT	369_S369ID Assembly Contig 4	0.392	316	8.97785
WPT	350_S350ID Assembly Contig 5	0.39	316	8
WPT	350_S350ID Assembly Contig 4	0.4	316	8
WPT	306_S306ID Assembly Contig 3	0.409	316	6.99684
WPT	301_S301ID Assembly Contig 37	0.391	316	7
WPT	301_S301ID Assembly Contig 36	0.395	316	5.99684
WPT	295_S295ID Assembly Contig 3	0.391	316	3.99684
WPT	212_S212ID Assembly Contig 3	0.414	316	87.7627
WPT	147_S147ID Assembly Contig 3	0.411	316	80.8576
WPT	139_S139ID Assembly Contig 4	0.399	316	6.99367
WPT	28_S28ID Assembly Contig 3	0.412	316	21.9462
WPT	74_S74ID Assembly Contig 1	0.411	316	45.8576
WPT	58_S58ID Assembly Contig 3	0.403	309	2
WPT	152_S152ID Assembly Contig 3	0.391	307	2
WPT	349_S349ID Assembly Contig 3	0.398	307	2
WPT	268_S268ID Assembly Contig 3	0.411	303	2
WPT	179_S179ID Assembly Contig 3	0.402		4034.05
WPT	2_S2ID Assembly Contig 4	0.402		1187.19
WPT	278_S278ID Assembly Contig 3	0.403		3600
WPT	56_S56ID Assembly Contig 3	0.402		4199.33
WPT	225_S225ID Assembly Contig 3	0.402		2318.73
WPT	200_S200ID Assembly Contig 3	0.402		3892.43
WPT	118_S118ID Assembly Contig 2	0.402		5693.3
WPT	87_S87ID Assembly Contig 3	0.412		1070.74
WPT	136_S136ID Assembly Contig 3	0.402		5043.08
WPT	93_S93ID Assembly Contig 3	0.402		4179.31
WPT	323_S323ID Assembly Contig 2	0.402		2151.62
WPT	273_S273ID Assembly Contig 3	0.402		4747.51
WPT	43_S43ID Assembly Contig 3	0.402		4750.42
WPT	301_S301ID Assembly Contig 15	0.403		2140.98
WPT	125_S125ID Assembly Contig 3	0.401		1021.75
WPT	301_S301ID Assembly Contig 17	0.402		2086.24
WPT	161_S161ID Assembly Contig 3	0.402		5059.61
WPT	333_S333ID Assembly Contig 3	0.402		2122.66
WPT	206_S206ID Assembly Contig 3	0.402		5037.32
WPT	301_S301ID Assembly Contig 21	0.403		1055.6
WPT	301_S301ID Assembly Contig 24	0.402		2795.66
WPT	354_S354ID Assembly Contig 5	0.403		2033.7
WPT	279_S279ID Assembly Contig 2	0.402		8956.36
WPT	62_S62ID Assembly Contig 3	0.412		1539.61
WPT	39_S39ID Assembly Contig 3	0.402		7244.09
WPT	168_S168ID Assembly Contig 3	0.412		1154.86
WPT	18_S18ID Assembly Contig 4	0.402		3794.35
WPT	3_S3ID Assembly Contig 2	0.402		15153.2
WPT	74_S74ID Assembly Contig 4	0.412		2711.88
WPT	301_S301ID Assembly Contig 34	0.402		3830.77
WPT	83_S83ID Assembly Contig 3	0.402		2240.59
WPT	4_S4ID Assembly Contig 3	0.402		5218.3
WPT	301_S301ID Assembly Contig 35	0.411		1216.73
WPT	138_S138ID Assembly Contig 3	0.403		1075.06
WPT	97_S97ID Assembly Contig 3	0.402		6110.11
WPT	10_S10ID Assembly Contig 3	0.412		1266.74
WPT	5_S5ID Assembly Contig 3	0.402		16604.4
WPT	289_S289ID Assembly Contig 3	0.412		2718.5
WPT	76_S76ID Assembly Contig 3	0.402		3317.07
WSK	241_S241ID Assembly Contig 3	0.402	334	996.093
WSK	263_S263ID Assembly Contig 2	0.413	333	961.955
WSK	286_S286ID Assembly Contig 2	0.412	327	707.541
WSK	254_S254ID Assembly Contig 2	0.412	327	432.391
WSK	317_S317ID Assembly Contig 2	0.413	327	464.098
WSK	301_S301ID Assembly Contig 3	0.412	327	276.443
WSK	121_S121ID Assembly Contig 1	0.402	326	838.966
WSK	276_S276ID Assembly Contig 3	0.413	326	726.794
WSK	140_S140ID Assembly Contig 2	0.413	325	387.415
WSK	87_S87ID Assembly Contig 2	0.412	320	422.269
WSK	253_S253ID Assembly Contig 4	0.411	319	149.702
WSK	112_S112ID Assembly Contig 3	0.412	318	103.726
WSK	250_S250ID Assembly Contig 3	0.414	318	137.714
WSK	231_S231ID Assembly Contig 2	0.416	318	54.934
WSK	218_S218ID Assembly Contig 3	0.414	318	115.704
WSK	264_S264ID Assembly Contig 2	0.402	318	188.45
WSK	112_S112ID Assembly Contig 4	0.412	318	284.465
WSK	163_S163ID Assembly Contig 2	0.4	317	8
WSK	332_S332ID Assembly Contig 3	0.409	317	5.98423
WSK	18_S18ID Assembly Contig 3	0.401	317	25.9779
WSK	285_S285ID Assembly Contig 3	0.398	317	24.9054
WSK	71_S71ID Assembly Contig 3	0.413	317	21.9905
WSK	253_S253ID Assembly Contig 3	0.406	316	87.8038
WSK	195_S195ID Assembly Contig 3	0.411	316	37.8797
WSK	92_S92ID Assembly Contig 3	0.401	316	32.9747
WSK	80_S80ID Assembly Contig 3	0.397	316	8.97785
WSK	241_S241ID Assembly Contig 2	0.402	316	25.9304
WSK	234_S234ID Assembly Contig 3	0.4	316	34.9589
WSK	332_S332ID Assembly Contig 2	0.401	316	10.9778
WSK	287_S287ID Assembly Contig 2	0.4	316	9
WSK	167_S167ID Assembly Contig 4	0.411	316	6
WSK	72_S72ID Assembly Contig 2	0.412	316	7.98101
WSK	171_S171ID Assembly Contig 1	0.412	316	45.9177
WSK	37_S37ID Assembly Contig 5	0.399	316	5.99367
WSK	10_S10ID Assembly Contig 2	0.394	316	17.9778
WSK	231_S231ID Assembly Contig 3	0.398	316	10.9842
WSK	96_S96ID Assembly Contig 2	0.401	316	7.98734
WSK	148_S148ID Assembly Contig 3	0.402	316	8
WSK	123_S123ID Assembly Contig 3	0.4	316	6.99051
WSK	282_S282ID Assembly Contig 5	0.398	316	5.99051
WSK	277_S277ID Assembly Contig 2	0.412	316	12
WSK	265_S265ID Assembly Contig 3	0.399	316	7
WSK	204_S204ID Assembly Contig 3	0.401	316	13.9842
WSK	126_S126ID Assembly Contig 3	0.413	316	24.8608
WSK	23_S23ID Assembly Contig 3	0.4	316	21.9968
WSK	175_S175ID Assembly Contig 2	0.404	316	12
WSK	11_S11ID Assembly Contig 3	0.4	316	15.9747
WSK	241_S241ID Assembly Contig 4	0.401	316	13.9778
WSK	187_S187ID Assembly Contig 2	0.404	316	6.99684
WSK	162_S162ID Assembly Contig 3	0.39	316	5.98418
WSK	117_S117ID Assembly Contig 3	0.394	316	5
WSK	46_S46ID Assembly Contig 3	0.412	316	4
WSK	255_S255ID Assembly Contig 2	0.401	316	5.99367
WSK	333_S333ID Assembly Contig 2	0.416	316	30.8892
WSK	41_S41ID Assembly Contig 3	0.411	307	2
WSK	164_S164ID Assembly Contig 1	0.402		2690.29
WSK	9_S9ID Assembly Contig 4	0.402		3930.39
WSK	279_S279ID Assembly Contig 1	0.402		5873.19
WSK	331_S331ID Assembly Contig 3	0.402		7604.25
WSK	163_S163ID Assembly Contig 3	0.413		1432.95
WSK	148_S148ID Assembly Contig 2	0.402		6237.14
WSK	37_S37ID Assembly Contig 4	0.413		1176.2
WSK	26_S26ID Assembly Contig 2	0.403		1155.75
WSK	331_S331ID Assembly Contig 4	0.402		9354.77
WSK	301_S301ID Assembly Contig 2	0.413		1585.12
WSK	20_S20ID Assembly Contig 3	0.402		3072.09
WSK	302_S302ID Assembly Contig 2	0.402		8191.62
WSK	151_S151ID Assembly Contig 5	0.412		1585.6
WSK	66_S66ID Assembly Contig 3	0.402		6990.55
WSK	32_S32ID Assembly Contig 3	0.413		1272.82
WSK	190_S190ID Assembly Contig 3	0.402		2735.1
WSK	271_S271ID Assembly Contig 3	0.402		1782.52
WSK	149_S149ID Assembly Contig 2	0.402		9429.23
WSK	95_S95ID Assembly Contig 2	0.413		1409.75
WSK	221_S221ID Assembly Contig 4	0.402		9512.96
WSK	340_S340ID Assembly Contig 3	0.413		1625.32
WSK	202_S202ID Assembly Contig 3	0.402		4163.99
WSK	177_S177ID Assembly Contig 4	0.402		6498.35
WSK	332_S332ID Assembly Contig 4	0.413		1214.28
WSK	330_S330ID Assembly Contig 3	0.402		2078.97
WTM	347_S347ID Assembly Contig 1	0.413	334	801.284
WTM	77_S77ID Assembly Contig 1	0.412	329	593.733
WTM	89_S89ID Assembly Contig 1	0.412	329	463.109
WTM	364_S364ID Assembly Contig 5	0.413	327	521.239
WTM	137_S137ID Assembly Contig 6	0.412	325	611.815
WTM	303_S303ID Assembly Contig 2	0.413	324	811.157
WTM	122_S122ID Assembly Contig 2	0.412	324	338.315
WTM	21_S21ID Assembly Contig 2	0.413	322	770.503
WTM	212_S212ID Assembly Contig 2	0.412	321	265.586
WTM	205_S205ID Assembly Contig 2	0.402	319	226.476
WTM	270_S270ID Assembly Contig 1	0.414	318	31.9717
WTM	362_S362ID Assembly Contig 5	0.412	318	186.758
WTM	178_S178ID Assembly Contig 1	0.409	318	56.9057
WTM	200_S200ID Assembly Contig 2	0.41	318	197.748
WTM	17_S17ID Assembly Contig 2	0.413	317	187.104
WTM	78_S78ID Assembly Contig 5	0.412	317	135.88
WTM	74_S74ID Assembly Contig 8	0.412	317	43.8959
WTM	76_S76ID Assembly Contig 2	0.414	317	148.795
WTM	46_S46ID Assembly Contig 1	0.411	317	151.621
WTM	169_S169ID Assembly Contig 1	0.412	317	80.9085
WTM	285_S285ID Assembly Contig 1	0.41	316	28.9494
WTM	362_S362ID Assembly Contig 4	0.402	316	8.99684
WTM	352_S352ID Assembly Contig 7	0.396	316	7.94304
WTM	350_S350ID Assembly Contig 7	0.397	316	4.99367
WTM	347_S347ID Assembly Contig 4	0.412	316	20.9937
WTM	331_S331ID Assembly Contig 5	0.404	316	11.9905
WTM	313_S313ID Assembly Contig 4	0.399	316	10.9778
WTM	312_S312ID Assembly Contig 5	0.399	316	7.99051
WTM	258_S258ID Assembly Contig 5	0.402	316	7.99684
WTM	229_S229ID Assembly Contig 3	0.407	316	6
WTM	114_S114ID Assembly Contig 3	0.395	316	12.9589
WTM	62_S62ID Assembly Contig 9	0.398	316	23.9652
WTM	45_S45ID Assembly Contig 5	0.414	316	5.99367
WTM	34_S34ID Assembly Contig 4	0.396	316	6
WTM	189_S189ID Assembly Contig 2	0.397	316	8.97785
WTM	28_S28ID Assembly Contig 2	0.393	316	7.99684
WTM	107_S107ID Assembly Contig 1	0.41	316	107.949
WTM	183_S183ID Assembly Contig 2	0.413	316	53.8291
WTM	313_S313ID Assembly Contig 2	0.413	316	69.8354
WTM	62_S62ID Assembly Contig 2	0.398	316	15.9968
WTM	243_S243ID Assembly Contig 2	0.405	316	7
WTM	108_S108ID Assembly Contig 2	0.408	316	5
WTM	307_S307ID Assembly Contig 1	0.395	316	19.9968
WTM	295_S295ID Assembly Contig 2	0.404	316	18.9842
WTM	39_S39ID Assembly Contig 2	0.39	316	8.99684
WTM	16_S16ID Assembly Contig 2	0.41	316	6
WTM	341_S341ID Assembly Contig 2	0.399	316	5
WTM	272_S272ID Assembly Contig 2	0.405	316	5.98101
WTM	30_S30ID Assembly Contig 2	0.402	316	15.9367
WTM	290_S290ID Assembly Contig 2	0.404	316	12.9905
WTM	211_S211ID Assembly Contig 2	0.399	316	8.98418
WTM	106_S106ID Assembly Contig 1	0.397	315	6.95873
WTM	219_S219ID Assembly Contig 5	0.402	307	2
WTM	316_S316ID Assembly Contig 2	0.408	306	2
WTM	226_S226ID Assembly Contig 6	0.398	304	2
WTM	242_S242ID Assembly Contig 1	0.402		1419.22
WTM	131_S131ID Assembly Contig 2	0.402		3859.57
WTM	360_S360ID Assembly Contig 3	0.402		4594.82
WTM	351_S351ID Assembly Contig 7	0.402		6400.18
WTM	349_S349ID Assembly Contig 6	0.412		1319.05
WTM	244_S244ID Assembly Contig 8	0.402		7909.69
WTM	196_S196ID Assembly Contig 3	0.412		1551.55
WTM	99_S99ID Assembly Contig 6	0.402		3119.75
WTM	62_S62ID Assembly Contig 10	0.402		1020.78
WTM	7_S7ID Assembly Contig 8	0.402		5034.7
WTM	79_S79ID Assembly Contig 1	0.413		1128.44
WTM	70_S70ID Assembly Contig 1	0.402		1151.69
WTM	259_S259ID Assembly Contig 1	0.402		4190.36
WTM	31_S31ID Assembly Contig 1	0.402		6134.19
WTM	208_S208ID Assembly Contig 1	0.412		1158.38
WTM	296_S296ID Assembly Contig 1	0.402		3867.13
WTM	84_S84ID Assembly Contig 1	0.402		1910.82
WTM	203_S203ID Assembly Contig 2	0.402		2410.26
WTM	135_S135ID Assembly Contig 1	0.402		7095.55
WTM	47_S47ID Assembly Contig 1	0.412		1177.75
WTM	150_S150ID Assembly Contig 1	0.402		15731.2
WTM	143_S143ID Assembly Contig 2	0.412		2396.18
WTM	269_S269ID Assembly Contig 2	0.402		5165.44
WTM	58_S58ID Assembly Contig 1	0.402		9061.63
WTM	182_S182ID Assembly Contig 2	0.413		1932.37
WTM	97_S97ID Assembly Contig 2	0.402		1767.45
WTPMH	42_S42ID Assembly Contig 3	0.412	333	896.649
WTPMH	369_S369ID Assembly Contig 7	0.412	333	647.405
WTPMH	42_S42ID Assembly Contig 1	0.412	332	938.419
WTPMH	222_S222ID Assembly Contig 5	0.413	330	447.585
WTPMH	137_S137ID Assembly Contig 4	0.412	328	670.988
WTPMH	143_S143ID Assembly Contig 1	0.412	328	512.418
WTPMH	290_S290ID Assembly Contig 4	0.402	326	634.724
WTPMH	67_S67ID Assembly Contig 4	0.402	326	582.294
WTPMH	137_S137ID Assembly Contig 1	0.412	326	675.92
WTPMH	68_S68ID Assembly Contig 1	0.412	326	566.006
WTPMH	295_S295ID Assembly Contig 5	0.412	325	840.194
WTPMH	205_S205ID Assembly Contig 8	0.412	325	694.963
WTPMH	357_S357ID Assembly Contig 5	0.403	325	394.222
WTPMH	327_S327ID Assembly Contig 3	0.412	324	602.753
WTPMH	122_S122ID Assembly Contig 3	0.412	323	513.337
WTPMH	301_S301ID Assembly Contig 70	0.412	323	302.344
WTPMH	367_S367ID Assembly Contig 1	0.413	322	399.155
WTPMH	370_S370ID Assembly Contig 5	0.414	322	134.637
WTPMH	105_S105ID Assembly Contig 1	0.402	321	459.003
WTPMH	359_S359ID Assembly Contig 1	0.413	321	340.421
WTPMH	301_S301ID Assembly Contig 64	0.413	320	311.428
WTPMH	344_S344ID Assembly Contig 1	0.402	320	153.725
WTPMH	346_S346ID Assembly Contig 9	0.402	320	297.913
WTPMH	301_S301ID Assembly Contig 69	0.41	320	142.734
WTPMH	355_S355ID Assembly Contig 4	0.404	319	73.8245
WTPMH	351_S351ID Assembly Contig 6	0.412	319	71.9185
WTPMH	344_S344ID Assembly Contig 6	0.412	319	401.608
WTPMH	326_S326ID Assembly Contig 7	0.41	319	114.746
WTPMH	289_S289ID Assembly Contig 4	0.402	318	110.783
WTPMH	270_S270ID Assembly Contig 3	0.413	318	91.8899
WTPMH	244_S244ID Assembly Contig 4	0.403	318	162.516
WTPMH	228_S228ID Assembly Contig 4	0.411	318	51.8113
WTPMH	190_S190ID Assembly Contig 4	0.41	318	150.717
WTPMH	344_S344ID Assembly Contig 7	0.41	318	24.9465
WTPMH	253_S253ID Assembly Contig 5	0.409	317	41.8991
WTPMH	231_S231ID Assembly Contig 6	0.412	317	161.678
WTPMH	55_S55ID Assembly Contig 4	0.413	317	54.9243
WTPMH	45_S45ID Assembly Contig 1	0.411	317	30.9842
WTPMH	368_S368ID Assembly Contig 1	0.404	317	28.9558
WTPMH	251_S251ID Assembly Contig 1	0.412	317	265.401
WTPMH	349_S349ID Assembly Contig 4	0.411	317	44.9558
WTPMH	344_S344ID Assembly Contig 8	0.412	317	43.9054
WTPMH	304_S304ID Assembly Contig 11	0.4	316	15.9778
WTPMH	304_S304ID Assembly Contig 10	0.396	316	15.9715
WTPMH	304_S304ID Assembly Contig 9	0.389	316	8.99051
WTPMH	303_S303ID Assembly Contig 5	0.403	316	7.9557
WTPMH	212_S212ID Assembly Contig 5	0.4	316	21.9589
WTPMH	189_S189ID Assembly Contig 4	0.4	316	6.99367
WTPMH	147_S147ID Assembly Contig 5	0.392	316	6.97468
WTPMH	131_S131ID Assembly Contig 5	0.408	316	9.97785
WTPMH	97_S97ID Assembly Contig 4	0.4	316	7.99367
WTPMH	85_S85ID Assembly Contig 4	0.396	316	8
WTPMH	78_S78ID Assembly Contig 3	0.378	316	2.96519
WTPMH	46_S46ID Assembly Contig 4	0.411	316	20.9905
WTPMH	36_S36ID Assembly Contig 6	0.413	316	118.823
WTPMH	31_S31ID Assembly Contig 3	0.411	316	43.9335
WTPMH	326_S326ID Assembly Contig 1	0.411	316	52.6582
WTPMH	27_S27ID Assembly Contig 1	0.41	316	11.9842
WTPMH	214_S214ID Assembly Contig 1	0.399	316	29.9873
WTPMH	97_S97ID Assembly Contig 1	0.405	316	8
WTPMH	335_S335ID Assembly Contig 1	0.401	316	8
WTPMH	61_S61ID Assembly Contig 1	0.405	316	6
WTPMH	111_S111ID Assembly Contig 1	0.409	316	5.99051
WTPMH	306_S306ID Assembly Contig 1	0.397	316	5.98418
WTPMH	78_S78ID Assembly Contig 1	0.399	316	13.9684
WTPMH	336_S336ID Assembly Contig 1	0.404	316	10.981
WTPMH	377_S377ID Assembly Contig 1	0.402	316	7.99051
WTPMH	370_S370ID Assembly Contig 4	0.412	316	43.9019
WTPMH	369_S369ID Assembly Contig 9	0.395	316	6.99051
WTPMH	367_S367ID Assembly Contig 6	0.412	316	72.8196
WTPMH	366_S366ID Assembly Contig 5	0.412	316	65.9272
WTPMH	304_S304ID Assembly Contig 15	0.407	316	7.98734
WTPMH	304_S304ID Assembly Contig 14	0.394	316	6.95886
WTPMH	304_S304ID Assembly Contig 12	0.394	316	6
WTPMH	294_S294ID Assembly Contig 5	0.393	316	6.99684
WTPMH	293_S293ID Assembly Contig 3	0.401	316	7
WTPMH	358_S358ID Assembly Contig 6	0.408	309	2
WTPMH	167_S167ID Assembly Contig 5	0.399	307	2
WTPMH	147_S147ID Assembly Contig 4	0.407	306	2
WTPMH	301_S301ID Assembly Contig 66	0.402		6283.23
WTPMH	301_S301ID Assembly Contig 65	0.413		1220.35
WTPMH	301_S301ID Assembly Contig 63	0.403		1504.94
WTPMH	294_S294ID Assembly Contig 4	0.402		4560.47
WTPMH	223_S223ID Assembly Contig 4	0.402		1178.91
WTPMH	206_S206ID Assembly Contig 5	0.403		2350.99
WTPMH	182_S182ID Assembly Contig 4	0.402		4747.58
WTPMH	149_S149ID Assembly Contig 4	0.402		8842.62
WTPMH	143_S143ID Assembly Contig 6	0.412		1573.3
WTPMH	131_S131ID Assembly Contig 4	0.402		3500.21
WTPMH	129_S129ID Assembly Contig 3	0.404		2317.72
WTPMH	101_S101ID Assembly Contig 3	0.402		10788.9
WTPMH	73_S73ID Assembly Contig 4	0.412		1441.43
WTPMH	39_S39ID Assembly Contig 7	0.402		4763.66
WTPMH	28_S28ID Assembly Contig 7	0.402		1038.29
WTPMH	35_S35ID Assembly Contig 1	0.402		3091.01
WTPMH	188_S188ID Assembly Contig 1	0.402		3973.49
WTPMH	355_S355ID Assembly Contig 1	0.402		2488.07
WTPMH	258_S258ID Assembly Contig 1	0.403		6578.88
WTPMH	136_S136ID Assembly Contig 1	0.413		1066
WTPMH	201_S201ID Assembly Contig 1	0.402		4352.65
WTPMH	152_S152ID Assembly Contig 1	0.403		2138.8
WTPMH	147_S147ID Assembly Contig 1	0.403		4434.45
WTPMH	369_S369ID Assembly Contig 8	0.402		1266.29
WTPMH	362_S362ID Assembly Contig 3	0.402		3662.5
WTPMH	336_S336ID Assembly Contig 5	0.402		2985.54
WTPMH	326_S326ID Assembly Contig 6	0.402		6387.72
WTPMH	304_S304ID Assembly Contig 13	0.402		6091.19
WTPMH	301_S301ID Assembly Contig 71	0.412		1112.2
WTPMH	301_S301ID Assembly Contig 68	0.401		3449.1
WTPMH	301_S301ID Assembly Contig 67	0.402		14475.9
WTPMH	292_S292ID Assembly Contig 5	0.412		2627.67
WTT	222_S222ID Assembly Contig 6	0.413	340	822.965
WTT	166_S166ID Assembly Contig 4	0.413	336	976.839
WTT	39_S39ID Assembly Contig 8	0.413	335	812.869
WTT	304_S304ID Assembly Contig 17	0.413	333	936.453
WTT	19_S19ID Assembly Contig 5	0.413	329	549.523
WTT	65_S65ID Assembly Contig 5	0.412	328	473.674
WTT	14_S14ID Assembly Contig 11	0.412	328	444.768
WTT	304_S304ID Assembly Contig 16	0.413	328	340.003
WTT	16_S16ID Assembly Contig 5	0.395	326	1.90798
WTT	177_S177ID Assembly Contig 6	0.396	325	3
WTT	189_S189ID Assembly Contig 6	0.413	323	723.229
WTT	200_S200ID Assembly Contig 8	0.412	322	407.478
WTT	101_S101ID Assembly Contig 1	0.412	322	418.528
WTT	220_S220ID Assembly Contig 6	0.413	320	291.194
WTT	36_S36ID Assembly Contig 8	0.412	319	204.812
WTT	339_S339ID Assembly Contig 1	0.409	319	225.621
WTT	358_S358ID Assembly Contig 7	0.413	318	158.145
WTT	243_S243ID Assembly Contig 7	0.413	317	133.833
WTT	243_S243ID Assembly Contig 6	0.411	317	45.9558
WTT	193_S193ID Assembly Contig 3	0.397	317	33.9748
WTT	65_S65ID Assembly Contig 4	0.413	317	203.407
WTT	35_S35ID Assembly Contig 4	0.402	317	8
WTT	363_S363ID Assembly Contig 1	0.402	317	15.4953
WTT	357_S357ID Assembly Contig 1	0.399	317	5.97161
WTT	290_S290ID Assembly Contig 6	0.401	316	8
WTT	213_S213ID Assembly Contig 3	0.401	316	8.99684
WTT	205_S205ID Assembly Contig 9	0.407	316	7
WTT	189_S189ID Assembly Contig 5	0.406	316	24.9905
WTT	177_S177ID Assembly Contig 5	0.396	316	22.9367
WTT	152_S152ID Assembly Contig 6	0.392	316	10.9652
WTT	152_S152ID Assembly Contig 5	0.396	316	7
WTT	151_S151ID Assembly Contig 7	0.387	316	4.97468
WTT	137_S137ID Assembly Contig 5	0.399	316	11.9968
WTT	131_S131ID Assembly Contig 6	0.39	316	11.9715
WTT	103_S103ID Assembly Contig 4	0.41	316	7.99684
WTT	101_S101ID Assembly Contig 4	0.398	316	5.99684
WTT	78_S78ID Assembly Contig 4	0.399	316	5.99684
WTT	75_S75ID Assembly Contig 4	0.414	316	5.99684
WTT	36_S36ID Assembly Contig 7	0.406	316	7.84177
WTT	28_S28ID Assembly Contig 9	0.387	316	6.86076
WTT	28_S28ID Assembly Contig 8	0.408	316	6.94304
WTT	21_S21ID Assembly Contig 7	0.407	316	6.74684
WTT	21_S21ID Assembly Contig 6	0.395	316	5.99367
WTT	19_S19ID Assembly Contig 4	0.383	316	3.93671
WTT	14_S14ID Assembly Contig 9	0.398	316	8.93038
WTT	119_S119ID Assembly Contig 1	0.402	316	29.6456
WTT	36_S36ID Assembly Contig 1	0.405	316	5.94937
WTT	223_S223ID Assembly Contig 1	0.412	316	3.94304
WTT	249_S249ID Assembly Contig 1	0.396	316	15.8639
WTT	142_S142ID Assembly Contig 1	0.408	316	13.8101
WTT	235_S235ID Assembly Contig 1	0.407	316	8.88291
WTT	374_S374ID Assembly Contig 5	0.396	316	8.8481
WTT	372_S372ID Assembly Contig 11	0.403	316	7.98734
WTT	343_S343ID Assembly Contig 8	0.391	316	41.0032
WTT	298_S298ID Assembly Contig 4	0.416	316	104.449
WTT	290_S290ID Assembly Contig 7	0.398	316	20.7152
WTT	260_S260ID Assembly Contig 3	0.399	316	13.6266
WTT	251_S251ID Assembly Contig 4	0.397	316	13.7278
WTT	244_S244ID Assembly Contig 6	0.405	316	6.9462
WTT	193_S193ID Assembly Contig 4	0.405	316	5.93671
WTT	165_S165ID Assembly Contig 3	0.392	316	11.7342
WTT	157_S157ID Assembly Contig 5	0.405	316	9.85443
WTT	152_S152ID Assembly Contig 7	0.41	316	5.74367
WTT	132_S132ID Assembly Contig 4	0.39	316	4
WTT	120_S120ID Assembly Contig 4	0.392	316	8.92405
WTT	99_S99ID Assembly Contig 5	0.39	316	7.87025
WTT	97_S97ID Assembly Contig 5	0.405	316	5.85759
WTT	74_S74ID Assembly Contig 7	0.395	316	4.98418
WTT	14_S14ID Assembly Contig 8	0.398	315	3.8127
WTT	371_S371ID Assembly Contig 7	0.407	315	6.97778
WTT	237_S237ID Assembly Contig 5	0.414	315	3.99048
WTT	99_S99ID Assembly Contig 4	0.402	315	6.91111
WTT	19_S19ID Assembly Contig 1	0.398	308	2.94805
WTT	369_S369ID Assembly Contig 10	0.4	307	2.98697
WTT	359_S359ID Assembly Contig 5	0.401	307	1.98046
WTT	305_S305ID Assembly Contig 3	0.416	303	2.9901
WTT	73_S73ID Assembly Contig 5	0.413	303	3
WTT	145_S145ID Assembly Contig 1	0.402	302	1.98675
WTT	237_S237ID Assembly Contig 1	0.404	301	2
WTT	191_S191ID Assembly Contig 1	0.419	295	1.99661
WTT	290_S290ID Assembly Contig 5	0.402		5264
WTT	258_S258ID Assembly Contig 4	0.412		1085.01
WTT	221_S221ID Assembly Contig 5	0.402		1176
WTT	212_S212ID Assembly Contig 6	0.402		7659.54
WTT	204_S204ID Assembly Contig 4	0.413		1457.87
WTT	200_S200ID Assembly Contig 7	0.402		2399.51
WTT	168_S168ID Assembly Contig 4	0.402		10941.1
WTT	143_S143ID Assembly Contig 7	0.412		2223.58
WTT	101_S101ID Assembly Contig 5	0.402		6663.17
WTT	74_S74ID Assembly Contig 6	0.413		1255.09
WTT	62_S62ID Assembly Contig 8	0.402		3231.38
WTT	32_S32ID Assembly Contig 5	0.402		7445.55
WTT	16_S16ID Assembly Contig 6	0.403		1999.09
WTT	14_S14ID Assembly Contig 10	0.402		12388.9
WTT	274_S274ID Assembly Contig 1	0.413		1347.79
WTT	198_S198ID Assembly Contig 1	0.402		12058.4
WTT	83_S83ID Assembly Contig 1	0.413		2172.57
WTT	88_S88ID Assembly Contig 1	0.401		9722.07
WTT	75_S75ID Assembly Contig 1	0.413		1727.75
WTT	224_S224ID Assembly Contig 1	0.402		8695.34
WTT	65_S65ID Assembly Contig 1	0.413		1170.09
WTT	280_S280ID Assembly Contig 1	0.402		12306
WTT	367_S367ID Assembly Contig 7	0.413		2071.95
WTT	305_S305ID Assembly Contig 4	0.402		5460.86
WTT	304_S304ID Assembly Contig 18	0.413		1109.76
WTT	244_S244ID Assembly Contig 7	0.402		7216.03
WTT	212_S212ID Assembly Contig 7	0.403		6614.46
WTT	177_S177ID Assembly Contig 7	0.402		4113.98
WTT	142_S142ID Assembly Contig 4	0.403		4968.44
WTT	131_S131ID Assembly Contig 7	0.403		9607.19
WTT	61_S61ID Assembly Contig 4	0.413		1306.89
