# Supplementary material for: Population Scale Analysis of Centromeric Satellite DNA Reveals Highly Dynamic Evolutionary Patterns and Genomic Organization in Long-Tailed and Rhesus Macaques
Source: Cells. 2022 Jun 17;11(12):1953. doi: 10.3390/cells11121953 (PMC9221937; doi:10.3390/cells11121953)
Supplement: Supplementary file 1 [file cells-11-01953-s001.zip › Supplementary Dataset S2.xlsx]

## Sheet: blast_results_satellite_primate
Supplementary dataset S2		Comparative alignments of cen-satDNA across different primate species.
Primate	Genomic Location	Length	Alignmnet Score	E-value	Percent Identity
Human	10:41755912-41756097	186	213	1.7e-55	77.42
Human	11:48690422-48690609	188	213	2.1e-55	78.19
Human	KI270728.1:575277-575466	190	213	2.6e-55	77.37
Human	11:54755516-54755706	191	211	1.2e-54	78.01
Human	19:24204510-24204697	188	207	1.1e-53	77.13
Human	7:61778332-61778517	186	204	1.2e-52	76.34
Human	X:58365349-58365536	188	201	8.8e-52	76.6
Human	7:62829205-62829392	188	200	1.6e-51	76.06
Human	19:27616016-27616203	188	196	2.4e-50	76.06
Human	12:37964982-37965169	188	196	2.4e-50	75.53
Human	5:46018223-46018412	190	196	2.6e-50	75.26
Human	5:46264908-46265092	185	194	1.1e-49	76.76
Human	6:58410727-58410912	187	193	2e-49	76.47
Human	2:132250085-132250272	188	193	2.6e-49	76.06
Human	5:46015820-46016007	188	190	2.5e-48	73.94
Human	7:62934278-62934465	188	190	2.7e-48	74.47
Human	5:45951289-45951473	185	188	1e-47	74.59
Human	11:54937829-54938016	188	185	6.2e-47	73.94
Human	KI270728.1:797819-798006	188	182	6e-46	73.4
Human	5:46209122-46209309	188	179	3.7e-45	74.47
Human	11:55114354-55114511	158	174	1.5e-43	77.85
Human	11:48650671-48650858	188	173	2.5e-43	73.4
Human	5:45917254-45917411	158	173	2.9e-43	77.22
Human	12:37969972-37970127	156	173	3.3e-43	76.92
Human	5:46189054-46189241	188	169	3.7e-42	71.28
Human	6:61501374-61501561	188	169	5e-42	72.87
Human	5:46164566-46164717	152	167	2.2e-41	77.63
Human	X:58428953-58429068	116	161	8.3e-40	85.34
Human	11:54907521-54907678	158	160	2e-39	74.05
Human	6:61458038-61458153	116	158	1.1e-38	83.62
Human	2:132249084-132249241	158	157	1.6e-38	75.32
Human	19:24361943-24362097	155	156	2.8e-38	73.55
Human	10:39301588-39301726	139	151	1.2e-36	74.82
Human	11:55011601-55011698	98	151	1.4e-36	89.8
Human	5:46253423-46253537	115	149	4.3e-36	81.74
Human	7:61318739-61318891	153	149	4.6e-36	73.86
Human	7:62171095-62171248	154	146	3.5e-35	74.03
Human	5:46012064-46012196	133	144	1.6e-34	75.94
Human	5:45955678-45955770	93	138	9.3e-33	87.1
Human	6:61453788-61453879	92	136	2.6e-32	88.04
Human	19:27568383-27568475	93	136	3.6e-32	87.1
Human	5:46232063-46232153	91	135	8.1e-32	87.91
Human	12:34617910-34618001	92	133	3.7e-31	86.96
Human	12:37808494-37808585	92	132	6.4e-31	86.96
Human	12:34422443-34422540	98	132	7e-31	83.67
Human	7:61893205-61893348	144	131	1.4e-30	70.83
Human	19:24230251-24230348	98	130	2.3e-30	83.67
Human	20:29738441-29738533	93	130	2.8e-30	86.02
Human	12:34507832-34507917	86	130	2.9e-30	88.37
Human	16:35971889-35971985	97	127	1.4e-29	84.54
Human	11:50452018-50452105	88	127	1.5e-29	87.5
Human	7:61659411-61659507	97	124	1.5e-28	82.47
Human	7:62088235-62088331	97	124	1.5e-28	82.47
Human	20:29730596-29730685	90	124	1.6e-28	85.56
Human	7:61733596-61733687	92	123	2.2e-28	84.78
Human	11:50539501-50539583	83	122	4.2e-28	86.75
Human	3:90285382-90285568	187	122	5.3e-28	66.31
Human	12:34591069-34591195	128	122	5.4e-28	75
Human	12:34500155-34500224	70	122	7.4e-28	94.29
Human	5:46024741-46024832	92	121	9e-28	84.78
Human	3:90295763-90295856	94	120	1.7e-27	82.98
Human	20:29285994-29286081	88	120	2.1e-27	85.23
Human	3:90284694-90284784	91	118	7.6e-27	83.52
Human	12:34634327-34634416	90	117	1.8e-26	83.33
Human	7:61777173-61777313	141	116	4e-26	69.5
Human	5:46288487-46288584	98	115	5.8e-26	80.61
Human	5:46178634-46178757	124	114	1.4e-25	72.58
Human	2:94543098-94543190	93	114	1.9e-25	81.72
Human	3:90354811-90354902	92	114	1.9e-25	81.52
Human	6:61485819-61485930	113	113	3.5e-25	76.99
Human	X:58393193-58393281	90	112	7.7e-25	82.22
Human	5:45918455-45918522	68	111	1.5e-24	91.18
Human	X:62683162-62683249	88	109	5.9e-24	80.68
Human	5:46268336-46268444	109	107	1.8e-23	73.39
Human	5:46019423-46019557	135	105	7.3e-23	66.67
Human	7:62896237-62896299	63	105	7.7e-23	92.06
Human	3:93799421-93799482	62	103	3.7e-22	91.94
Human	5:45964049-45964161	113	102	4.2e-22	73.45
Human	3:90264302-90264402	101	102	5.1e-22	76.24
Human	5:46237558-46237632	75	102	5.6e-22	85.33
Human	17:22739067-22739130	64	101	1e-21	90.62
Human	5:46211185-46211301	117	101	1.5e-21	70.94
Human	3:90294234-90294322	89	100	3.1e-21	79.78
Human	6:61299683-61299750	68	96	3.1e-20	88.24
Human	7:61695829-61695887	59	93	3.8e-19	89.83
Human	15:17076903-17076961	59	93	3.8e-19	89.83
Human	5:46074703-46074755	53	93	3.9e-19	94.34
Human	7:62827443-62827501	59	90	2.3e-18	89.83
Human	12:34572110-34572168	59	90	2.7e-18	89.83
Human	5:45984932-45985003	72	90	2.8e-18	81.94
Human	5:45963424-45963498	75	90	3.2e-18	80
Human	7:62960095-62960149	55	89	6.8e-18	92.73
Human	12:37859414-37859475	62	88	1.3e-17	85.48
Human	7:62187443-62187503	61	87	1.5e-17	88.52
Human	11:48756891-48756952	62	87	1.6e-17	85.48
Human	19:27605611-27605666	56	86	3e-17	91.07
Human	12:34591008-34591063	56	86	3e-17	91.07
Human	12:34441053-34441111	59	85	5.9e-17	84.75
Human	5:46231757-46231811	55	84	1.2e-16	90.91
Human	3:90294431-90294491	61	84	1.2e-16	83.61
Gibbon	10:49385165-49385280	116	134	2e-29	89.66
Gibbon	X:35140541-35140656	116	119	1e-24	87.93
Gibbon	17:49597631-49597722	93	119	1e-24	91.4
Gibbon	6:26260237-26260356	120	119	1e-24	87.5
Gibbon	X:35147847-35147944	98	115	2e-23	89.8
Gibbon	JH996242:124224-124313	90	115	2e-23	91.11
Gibbon	GL397640:28994-29115	122	115	2e-23	86.89
Gibbon	GL397614:137832-137921	90	115	2e-23	91.11
Gibbon	GL397550:561845-561942	98	115	2e-23	89.8
Gibbon	X:35095025-35095162	139	113	7e-23	85.61
Gibbon	ADFV01138168:9964-10079	116	111	3e-22	87.07
Gibbon	GL397534:598558-598676	119	109	1e-21	86.55
Gibbon	21:27832061-27832183	123	109	1e-21	86.18
Gibbon	7b:42465844-42465966	123	109	1e-21	86.18
Gibbon	17:49631679-49631776	98	107	5e-21	88.78
Gibbon	6:26252710-26252799	90	107	5e-21	90
Gibbon	JH996242:128342-128471	130	107	5e-21	85.38
Gibbon	GL397534:587890-587987	98	107	5e-21	88.78
Gibbon	GL397719:29212-29277	66	107	5e-21	95.45
Gibbon	GL397647:49992-50111	124	107	5e-21	86.29
Gibbon	GL397647:51872-51993	123	107	5e-21	86.18
Gibbon	GL397713:29214-29303	90	107	5e-21	90
Gibbon	GL397713:36740-36841	102	107	5e-21	88.24
Gibbon	JH996241:110140-110229	90	107	5e-21	90
Gibbon	X:35145260-35145352	93	105	2e-20	89.25
Gibbon	JH996242:122909-122981	73	105	2e-20	93.15
Gibbon	GL397550:530987-531107	121	105	2e-20	85.95
Gibbon	GL397550:608973-609065	93	105	2e-20	89.25
Gibbon	10:49442536-49442647	112	103	7e-20	86.61
Gibbon	X:35086673-35086788	116	103	7e-20	86.21
Gibbon	X:35110779-35110894	116	103	7e-20	86.21
Gibbon	X:35145097-35145212	116	103	7e-20	86.21
Gibbon	GL397550:586715-586806	92	103	7e-20	89.13
Gibbon	GL397550:614235-614350	116	103	7e-20	86.21
Gibbon	GL397713:28151-28262	112	103	7e-20	86.61
Gibbon	X:33725674-33725796	123	101	3e-19	85.37
Gibbon	X:35083620-35083710	91	101	3e-19	89.01
Gibbon	X:35113738-35113852	115	101	3e-19	86.09
Gibbon	17:49639098-49639189	93	101	3e-19	89.25
Gibbon	6:25506106-25506216	112	101	3e-19	86.61
Gibbon	GL397550:548372-548434	63	101	3e-19	95.24
Gibbon	GL397550:567630-567696	68	101	3e-19	94.12
Gibbon	GL397534:589070-589184	115	101	3e-19	86.09
Gibbon	21:27847233-27847355	123	101	3e-19	85.37
Gibbon	GL397719:54964-55086	123	101	3e-19	85.37
Gibbon	JH996241:117534-117672	139	101	3e-19	84.17
Gibbon	ADFV01140151:8924-9027	104	101	3e-19	87.5
Gibbon	X:33804813-33804910	98	99.3	1e-18	87.76
Gibbon	X:35086347-35086444	98	99.3	1e-18	87.76
Gibbon	X:35092979-35093100	123	99.3	1e-18	85.37
Gibbon	X:35117401-35117498	98	99.3	1e-18	87.76
Gibbon	X:35144405-35144526	123	99.3	1e-18	85.37
Gibbon	17:49617650-49617739	90	99.3	1e-18	88.89
Gibbon	GL397614:130298-130399	102	99.3	1e-18	87.25
Gibbon	GL397550:488478-488611	134	99.3	1e-18	84.33
Gibbon	GL397550:513968-514065	98	99.3	1e-18	87.76
Gibbon	21:27841366-27841463	98	99.3	1e-18	87.76
Gibbon	GL397719:36411-36510	103	99.3	1e-18	87.38
Gibbon	GL397647:49645-49767	124	99.3	1e-18	85.48
Gibbon	GL397647:87319-87416	98	99.3	1e-18	87.76
Gibbon	JH996241:114377-114506	130	99.3	1e-18	84.62
Gibbon	ADFV01140151:1241-1330	90	99.3	1e-18	88.89
Gibbon	3:70076387-70076520	134	99.3	1e-18	84.33
Gibbon	X:35079225-35079317	93	97.4	4e-18	88.17
Gibbon	17:49601519-49601611	93	97.4	4e-18	88.17
Gibbon	6:25522772-25522864	93	97.4	4e-18	88.17
Gibbon	JH996242:144621-144709	89	97.4	4e-18	88.76
Gibbon	GL397640:27998-28062	65	97.4	4e-18	93.85
Gibbon	GL397550:534247-534335	89	97.4	4e-18	88.76
Gibbon	GL397713:58434-58526	93	97.4	4e-18	88.17
Gibbon	JH996241:130074-130166	93	97.4	4e-18	88.17
Gibbon	GL403774:3413-3501	89	97.4	4e-18	88.76
Gibbon	GL397899:25932-26024	93	97.4	4e-18	88.17
Gibbon	10:49359847-49359962	118	95.4	2e-17	85.59
Gibbon	10:49365807-49365906	100	95.4	2e-17	87
Gibbon	X:33759442-33759537	96	95.4	2e-17	87.5
Gibbon	X:35104955-35105070	118	95.4	2e-17	85.59
Gibbon	X:35109595-35109706	112	95.4	2e-17	85.71
Gibbon	X:35150756-35150851	96	95.4	2e-17	87.5
Gibbon	17:49600525-49600592	68	95.4	2e-17	92.65
Gibbon	17:49647663-49647750	88	95.4	2e-17	88.64
Gibbon	6:26257252-26257363	112	95.4	2e-17	85.71
Gibbon	JH996242:122019-122130	112	95.4	2e-17	85.71
Gibbon	JH996242:149562-149677	116	95.4	2e-17	85.34
Gibbon	GL397614:138873-138984	112	95.4	2e-17	85.71
Gibbon	GL397550:486944-487035	92	95.4	2e-17	88.04
Gibbon	GL397550:501244-501361	121	95.4	2e-17	85.12
Gibbon	GL397550:533563-533682	123	95.4	2e-17	84.55
Gibbon	GL397550:548689-548800	112	95.4	2e-17	85.71
Gibbon	GL397534:590883-590975	93	95.4	2e-17	88.17
Gibbon	21:27849494-27849585	92	95.4	2e-17	88.04
Gibbon	ADFV01140151:179-290	112	95.4	2e-17	85.71
Gibbon	GL397899:27456-27567	113	95.4	2e-17	85.84
Gibbon	10:49392937-49393039	103	93.4	7e-17	86.41
Gibbon	X:33749704-33749826	123	93.4	7e-17	84.55
Gibbon	X:35139339-35139461	123	93.4	7e-17	84.55
Gibbon	17:49640468-49640554	87	93.4	7e-17	88.51
Gibbon	6:25523295-25523389	95	93.4	7e-17	87.37
Gibbon	6:26251647-26251757	112	93.4	7e-17	85.71
Gibbon	6:26264021-26264131	112	93.4	7e-17	85.71
Long tailed macaque	JAANEP010000834:865-1180	316	625	6e-177	100
Long tailed macaque	JAANEP010000804:1105-1420	316	625	6e-177	100
Long tailed macaque	JAANEP010001073:543-858	316	625	6e-177	100
Long tailed macaque	JAANEP010000830:2012-2327	316	625	6e-177	100
Long tailed macaque	JAANEP010000891:1883-2198	316	625	6e-177	100
Long tailed macaque	JAANEP010000865:1612-1927	316	625	6e-177	100
Long tailed macaque	JAANEP010000944:1369-1684	316	625	6e-177	100
Long tailed macaque	JAANEP010000944:1712-2027	316	625	6e-177	100
Long tailed macaque	JAANEP010000815:2419-2734	316	625	6e-177	100
Long tailed macaque	JAANEP010000975:1998-2313	316	625	6e-177	100
Long tailed macaque	JAANEP010001017:2026-2341	316	625	6e-177	100
Long tailed macaque	JAANEP010001017:4415-4730	316	625	6e-177	100
Long tailed macaque	JAANEP010001424:3751-4066	316	625	6e-177	100
Long tailed macaque	JAANEP010000889:2701-3016	316	625	6e-177	100
Long tailed macaque	JAANEP010001324:1834-2149	316	625	6e-177	100
Long tailed macaque	JAANEP010000811:4220-4535	316	625	6e-177	100
Long tailed macaque	JAANEP010001075:2066-2381	316	625	6e-177	100
Long tailed macaque	JAANEP010000823:4791-5106	316	625	6e-177	100
Long tailed macaque	JAANEP010001302:465-780	316	625	6e-177	100
Long tailed macaque	JAANEP010001302:3026-3341	316	625	6e-177	100
Long tailed macaque	JAANEP010001302:3369-3684	316	625	6e-177	100
Long tailed macaque	JAANEP010000917:2182-2497	316	625	6e-177	100
Long tailed macaque	JAANEP010001079:2542-2857	316	625	6e-177	100
Long tailed macaque	JAANEP010001079:3567-3882	316	625	6e-177	100
Long tailed macaque	JAANEP010001079:3906-4221	316	625	6e-177	100
Long tailed macaque	JAANEP010000801:2226-2541	316	625	6e-177	100
Long tailed macaque	JAANEP010001074:5307-5622	316	625	6e-177	100
Long tailed macaque	JAANEP010000919:2031-2346	316	625	6e-177	100
Long tailed macaque	JAANEP010000941:3388-3703	316	625	6e-177	100
Long tailed macaque	JAANEP010000925:3977-4292	316	625	6e-177	100
Long tailed macaque	JAANEP010000925:4320-4635	316	625	6e-177	100
Long tailed macaque	JAANEP010000925:4663-4978	316	625	6e-177	100
Long tailed macaque	JAANEP010000925:6711-7026	316	625	6e-177	100
Long tailed macaque	JAANEP010000925:7736-8051	316	625	6e-177	100
Long tailed macaque	JAANEP010000918:5576-5891	316	625	6e-177	100
Long tailed macaque	JAANEP010000863:6995-7310	316	625	6e-177	100
Long tailed macaque	JAANEP010000857:3456-3771	316	625	6e-177	100
Long tailed macaque	JAANEP010000857:4821-5136	316	625	6e-177	100
Long tailed macaque	JAANEP010000857:9250-9565	316	625	6e-177	100
Long tailed macaque	JAANEP010000959:6791-7106	316	625	6e-177	100
Long tailed macaque	JAANEP010000959:7476-7791	316	625	6e-177	100
Long tailed macaque	JAANEP010000959:8502-8817	316	625	6e-177	100
Long tailed macaque	JAANEP010001077:4950-5265	316	625	6e-177	100
Long tailed macaque	JAANEP010001077:8356-8671	316	625	6e-177	100
Long tailed macaque	JAANEP010001022:1822-2137	316	625	6e-177	100
Long tailed macaque	JAANEP010001022:6940-7255	316	625	6e-177	100
Long tailed macaque	JAANEP010001022:8650-8965	316	625	6e-177	100
Long tailed macaque	JAANEP010001022:9675-9990	316	625	6e-177	100
Long tailed macaque	JAANEP010000926:6033-6348	316	625	6e-177	100
Long tailed macaque	JAANEP010000961:4656-4971	316	625	6e-177	100
Long tailed macaque	JAANEP010000961:4999-5314	316	625	6e-177	100
Long tailed macaque	JAANEP010000961:5342-5657	316	625	6e-177	100
Long tailed macaque	JAANEP010000961:6368-6683	316	625	6e-177	100
Long tailed macaque	JAANEP010000961:7736-8051	316	625	6e-177	100
Long tailed macaque	JAANEP010001410:1739-2054	316	625	6e-177	100
Long tailed macaque	JAANEP010001410:2082-2397	316	625	6e-177	100
Long tailed macaque	JAANEP010001410:2425-2740	316	625	6e-177	100
Long tailed macaque	JAANEP010001410:2749-3064	316	625	6e-177	100
Long tailed macaque	JAANEP010001410:3092-3407	316	625	6e-177	100
Long tailed macaque	JAANEP010001410:3777-4092	316	625	6e-177	100
Long tailed macaque	JAANEP010001410:5488-5803	316	625	6e-177	100
Long tailed macaque	JAANEP010001410:7537-7852	316	625	6e-177	100
Long tailed macaque	JAANEP010001410:7880-8195	316	625	6e-177	100
Long tailed macaque	JAANEP010001410:9928-10243	316	625	6e-177	100
Long tailed macaque	JAANEP010001410:12322-12637	316	625	6e-177	100
Long tailed macaque	JAANEP010001410:14029-14344	316	625	6e-177	100
Long tailed macaque	JAANEP010001410:15397-15712	316	625	6e-177	100
Long tailed macaque	JAANEP010001410:16421-16736	316	625	6e-177	100
Long tailed macaque	JAANEP010001410:16764-17079	316	625	6e-177	100
Long tailed macaque	JAANEP010001410:17107-17422	316	625	6e-177	100
Long tailed macaque	JAANEP010001076:6739-7054	316	625	6e-177	100
Long tailed macaque	JAANEP010001076:7082-7397	316	625	6e-177	100
Long tailed macaque	JAANEP010001076:8107-8422	316	625	6e-177	100
Long tailed macaque	JAANEP010001076:8792-9107	316	625	6e-177	100
Long tailed macaque	JAANEP010001076:9464-9779	316	625	6e-177	100
Long tailed macaque	JAANEP010001076:10149-10464	316	625	6e-177	100
Long tailed macaque	JAANEP010001076:10834-11149	316	625	6e-177	100
Long tailed macaque	JAANEP010001076:11861-12176	316	625	6e-177	100
Long tailed macaque	JAANEP010001076:12886-13201	316	625	6e-177	100
Long tailed macaque	JAANEP010001076:15824-16139	316	625	6e-177	100
Long tailed macaque	JAANEP010001076:16850-17165	316	625	6e-177	100
Long tailed macaque	JAANEP010000940:6475-6790	316	625	6e-177	100
Long tailed macaque	JAANEP010000940:7499-7814	316	625	6e-177	100
Long tailed macaque	JAANEP010000940:8862-9177	316	625	6e-177	100
Long tailed macaque	JAANEP010000860:1916-2231	316	625	6e-177	100
Long tailed macaque	JAANEP010000860:3619-3934	316	625	6e-177	100
Long tailed macaque	JAANEP010000860:3962-4277	316	625	6e-177	100
Long tailed macaque	JAANEP010000860:5330-5645	316	625	6e-177	100
Long tailed macaque	JAANEP010000860:7035-7350	316	625	6e-177	100
Long tailed macaque	JAANEP010000860:10788-11103	316	625	6e-177	100
Long tailed macaque	JAANEP010000860:11474-11789	316	625	6e-177	100
Long tailed macaque	JAANEP010000860:11817-12132	316	625	6e-177	100
Long tailed macaque	JAANEP010000860:13186-13501	316	625	6e-177	100
Long tailed macaque	JAANEP010000860:13871-14186	316	625	6e-177	100
Long tailed macaque	JAANEP010000860:14214-14529	316	625	6e-177	100
Long tailed macaque	JAANEP010000860:16263-16578	316	625	6e-177	100
Long tailed macaque	JAANEP010000913:18226-18541	316	625	6e-177	100
Long tailed macaque	JAANEP010000913:18911-19226	316	625	6e-177	100
Long tailed macaque	JAANEP010000913:19593-19908	316	625	6e-177	100
Long tailed macaque	JAANEP010000913:20278-20593	316	625	6e-177	100
Olive baboon	AHZZ02083639:69-384	316	625	6e-177	100
Olive baboon	AHZZ02077115:132-447	316	625	6e-177	100
Olive baboon	AHZZ02077115:475-790	316	625	6e-177	100
Olive baboon	AHZZ02077932:290-605	316	625	6e-177	100
Olive baboon	AHZZ02064536:473-788	316	625	6e-177	100
Olive baboon	AHZZ02063272:279-594	316	625	6e-177	100
Olive baboon	AHZZ02063272:622-937	316	625	6e-177	100
Olive baboon	AHZZ02101191:446-761	316	625	6e-177	100
Olive baboon	AHZZ02096971:188-503	316	625	6e-177	100
Olive baboon	AHZZ02096971:531-846	316	625	6e-177	100
Olive baboon	AHZZ02057884:408-723	316	625	6e-177	100
Olive baboon	AHZZ02094155:335-650	316	625	6e-177	100
Olive baboon	AHZZ02088545:353-668	316	625	6e-177	100
Olive baboon	AHZZ02078522:518-833	316	625	6e-177	100
Olive baboon	AHZZ02091565:513-828	316	625	6e-177	100
Olive baboon	AHZZ02090388:601-916	316	625	6e-177	100
Olive baboon	AHZZ02073931:395-710	316	625	6e-177	100
Olive baboon	AHZZ02054072:508-823	316	625	6e-177	100
Olive baboon	AHZZ02076296:557-872	316	625	6e-177	100
Olive baboon	AHZZ02056023:322-637	316	625	6e-177	100
Olive baboon	AHZZ02054373:121-436	316	625	6e-177	100
Olive baboon	AHZZ02054373:464-779	316	625	6e-177	100
Olive baboon	AHZZ02099563:220-535	316	625	6e-177	100
Olive baboon	AHZZ02099563:563-878	316	625	6e-177	100
Olive baboon	AHZZ02085661:405-720	316	625	6e-177	100
Olive baboon	AHZZ02078691:413-728	316	625	6e-177	100
Olive baboon	AHZZ02103200:306-621	316	625	6e-177	100
Olive baboon	AHZZ02099746:363-678	316	625	6e-177	100
Olive baboon	AHZZ02109245:469-784	316	625	6e-177	100
Olive baboon	AHZZ02057626:363-678	316	625	6e-177	100
Olive baboon	AHZZ02102523:601-916	316	625	6e-177	100
Olive baboon	AHZZ02074295:150-465	316	625	6e-177	100
Olive baboon	AHZZ02074295:493-808	316	625	6e-177	100
Olive baboon	AHZZ02088093:669-984	316	625	6e-177	100
Olive baboon	AHZZ02101282:619-934	316	625	6e-177	100
Olive baboon	AHZZ02081859:328-643	316	625	6e-177	100
Olive baboon	AHZZ02082548:604-919	316	625	6e-177	100
Olive baboon	AHZZ02101423:273-588	316	625	6e-177	100
Olive baboon	AHZZ02078760:505-820	316	625	6e-177	100
Olive baboon	AHZZ02092184:281-596	316	625	6e-177	100
Olive baboon	AHZZ02093783:292-607	316	625	6e-177	100
Olive baboon	AHZZ02096684:322-637	316	625	6e-177	100
Olive baboon	AHZZ02069165:126-441	316	625	6e-177	100
Olive baboon	AHZZ02058897:187-502	316	625	6e-177	100
Olive baboon	AHZZ02092318:166-481	316	625	6e-177	100
Olive baboon	AHZZ02084147:327-642	316	625	6e-177	100
Olive baboon	AHZZ02091549:277-592	316	625	6e-177	100
Olive baboon	AHZZ02094460:420-735	316	625	6e-177	100
Olive baboon	AHZZ02112165:101-416	316	625	6e-177	100
Olive baboon	AHZZ02072911:487-802	316	625	6e-177	100
Olive baboon	AHZZ02061043:404-719	316	625	6e-177	100
Olive baboon	AHZZ02057308:347-662	316	625	6e-177	100
Olive baboon	AHZZ02052007:651-966	316	625	6e-177	100
Olive baboon	AHZZ02078519:199-514	316	625	6e-177	100
Olive baboon	AHZZ02079838:255-570	316	625	6e-177	100
Olive baboon	AHZZ02093444:518-833	316	625	6e-177	100
Olive baboon	AHZZ02073243:309-624	316	625	6e-177	100
Olive baboon	AHZZ02073243:652-967	316	625	6e-177	100
Olive baboon	AHZZ02105590:243-558	316	625	6e-177	100
Olive baboon	AHZZ02059963:341-656	316	625	6e-177	100
Olive baboon	AHZZ02083676:435-750	316	625	6e-177	100
Olive baboon	AHZZ02065433:402-717	316	625	6e-177	100
Olive baboon	AHZZ02065433:745-1060	316	625	6e-177	100
Olive baboon	AHZZ02084789:364-679	316	625	6e-177	100
Olive baboon	AHZZ02077698:111-426	316	625	6e-177	100
Olive baboon	AHZZ02061142:553-868	316	625	6e-177	100
Olive baboon	AHZZ02111861:311-626	316	625	6e-177	100
Olive baboon	AHZZ02051754:573-888	316	625	6e-177	100
Olive baboon	AHZZ02105170:518-833	316	625	6e-177	100
Olive baboon	AHZZ02064826:81-396	316	625	6e-177	100
Olive baboon	AHZZ02074575:580-895	316	625	6e-177	100
Olive baboon	AHZZ02076342:360-675	316	625	6e-177	100
Olive baboon	AHZZ02107855:301-616	316	625	6e-177	100
Olive baboon	AHZZ02108805:809-1124	316	625	6e-177	100
Olive baboon	AHZZ02076457:142-457	316	625	6e-177	100
Olive baboon	AHZZ02076457:485-800	316	625	6e-177	100
Olive baboon	AHZZ02095649:746-1061	316	625	6e-177	100
Olive baboon	AHZZ02064160:50-365	316	625	6e-177	100
Olive baboon	AHZZ02083975:546-861	316	625	6e-177	100
Olive baboon	AHZZ02084386:260-575	316	625	6e-177	100
Olive baboon	AHZZ02097381:207-522	316	625	6e-177	100
Olive baboon	AHZZ02095552:448-763	316	625	6e-177	100
Olive baboon	AHZZ02105987:140-455	316	625	6e-177	100
Olive baboon	AHZZ02065062:356-671	316	625	6e-177	100
Olive baboon	AHZZ02063258:705-1020	316	625	6e-177	100
Olive baboon	AHZZ02064923:809-1124	316	625	6e-177	100
Olive baboon	AHZZ02080057:440-755	316	625	6e-177	100
Olive baboon	AHZZ02051330:208-523	316	625	6e-177	100
Olive baboon	AHZZ02086629:294-609	316	625	6e-177	100
Olive baboon	AHZZ02110682:629-944	316	625	6e-177	100
Olive baboon	AHZZ02109476:632-947	316	625	6e-177	100
Olive baboon	AHZZ02059132:856-1171	316	625	6e-177	100
Olive baboon	AHZZ02091570:220-535	316	625	6e-177	100
Olive baboon	AHZZ02087092:919-1234	316	625	6e-177	100
Olive baboon	AHZZ02063681:119-434	316	625	6e-177	100
Olive baboon	AHZZ02071292:147-462	316	625	6e-177	100
Olive baboon	AHZZ02064832:365-680	316	625	6e-177	100
Olive baboon	AHZZ02097940:130-445	316	625	6e-177	100
Olive baboon	AHZZ02070238:958-1273	316	625	6e-177	100
Olive baboon	AHZZ02084770:404-719	316	625	6e-177	100
Gibbon	10:49385165-49385280	116	134	2e-29	89.66
Gibbon	X:35140541-35140656	116	119	1e-24	87.93
Gibbon	17:49597631-49597722	93	119	1e-24	91.4
Gibbon	6:26260237-26260356	120	119	1e-24	87.5
Gibbon	X:35147847-35147944	98	115	2e-23	89.8
Gibbon	JH996242:124224-124313	90	115	2e-23	91.11
Gibbon	GL397640:28994-29115	122	115	2e-23	86.89
Gibbon	GL397614:137832-137921	90	115	2e-23	91.11
Gibbon	GL397550:561845-561942	98	115	2e-23	89.8
Gibbon	X:35095025-35095162	139	113	7e-23	85.61
Gibbon	ADFV01138168:9964-10079	116	111	3e-22	87.07
Gibbon	GL397534:598558-598676	119	109	1e-21	86.55
Gibbon	21:27832061-27832183	123	109	1e-21	86.18
Gibbon	7b:42465844-42465966	123	109	1e-21	86.18
Gibbon	17:49631679-49631776	98	107	5e-21	88.78
Gibbon	6:26252710-26252799	90	107	5e-21	90
Gibbon	JH996242:128342-128471	130	107	5e-21	85.38
Gibbon	GL397534:587890-587987	98	107	5e-21	88.78
Gibbon	GL397719:29212-29277	66	107	5e-21	95.45
Gibbon	GL397647:49992-50111	124	107	5e-21	86.29
Gibbon	GL397647:51872-51993	123	107	5e-21	86.18
Gibbon	GL397713:29214-29303	90	107	5e-21	90
Gibbon	GL397713:36740-36841	102	107	5e-21	88.24
Gibbon	JH996241:110140-110229	90	107	5e-21	90
Gibbon	X:35145260-35145352	93	105	2e-20	89.25
Gibbon	JH996242:122909-122981	73	105	2e-20	93.15
Gibbon	GL397550:530987-531107	121	105	2e-20	85.95
Gibbon	GL397550:608973-609065	93	105	2e-20	89.25
Gibbon	10:49442536-49442647	112	103	7e-20	86.61
Gibbon	X:35086673-35086788	116	103	7e-20	86.21
Gibbon	X:35110779-35110894	116	103	7e-20	86.21
Gibbon	X:35145097-35145212	116	103	7e-20	86.21
Gibbon	GL397550:586715-586806	92	103	7e-20	89.13
Gibbon	GL397550:614235-614350	116	103	7e-20	86.21
Gibbon	GL397713:28151-28262	112	103	7e-20	86.61
Gibbon	X:33725674-33725796	123	101	3e-19	85.37
Gibbon	X:35083620-35083710	91	101	3e-19	89.01
Gibbon	X:35113738-35113852	115	101	3e-19	86.09
Gibbon	17:49639098-49639189	93	101	3e-19	89.25
Gibbon	6:25506106-25506216	112	101	3e-19	86.61
Gibbon	GL397550:548372-548434	63	101	3e-19	95.24
Gibbon	GL397550:567630-567696	68	101	3e-19	94.12
Gibbon	GL397534:589070-589184	115	101	3e-19	86.09
Gibbon	21:27847233-27847355	123	101	3e-19	85.37
Gibbon	GL397719:54964-55086	123	101	3e-19	85.37
Gibbon	JH996241:117534-117672	139	101	3e-19	84.17
Gibbon	ADFV01140151:8924-9027	104	101	3e-19	87.5
Gibbon	X:33804813-33804910	98	99.3	1e-18	87.76
Gibbon	X:35086347-35086444	98	99.3	1e-18	87.76
Gibbon	X:35092979-35093100	123	99.3	1e-18	85.37
Gibbon	X:35117401-35117498	98	99.3	1e-18	87.76
Gibbon	X:35144405-35144526	123	99.3	1e-18	85.37
Gibbon	17:49617650-49617739	90	99.3	1e-18	88.89
Gibbon	GL397614:130298-130399	102	99.3	1e-18	87.25
Gibbon	GL397550:488478-488611	134	99.3	1e-18	84.33
Gibbon	GL397550:513968-514065	98	99.3	1e-18	87.76
Gibbon	21:27841366-27841463	98	99.3	1e-18	87.76
Gibbon	GL397719:36411-36510	103	99.3	1e-18	87.38
Gibbon	GL397647:49645-49767	124	99.3	1e-18	85.48
Gibbon	GL397647:87319-87416	98	99.3	1e-18	87.76
Gibbon	JH996241:114377-114506	130	99.3	1e-18	84.62
Gibbon	ADFV01140151:1241-1330	90	99.3	1e-18	88.89
Gibbon	3:70076387-70076520	134	99.3	1e-18	84.33
Gibbon	X:35079225-35079317	93	97.4	4e-18	88.17
Gibbon	17:49601519-49601611	93	97.4	4e-18	88.17
Gibbon	6:25522772-25522864	93	97.4	4e-18	88.17
Gibbon	JH996242:144621-144709	89	97.4	4e-18	88.76
Gibbon	GL397640:27998-28062	65	97.4	4e-18	93.85
Gibbon	GL397550:534247-534335	89	97.4	4e-18	88.76
Gibbon	GL397713:58434-58526	93	97.4	4e-18	88.17
Gibbon	JH996241:130074-130166	93	97.4	4e-18	88.17
Gibbon	GL403774:3413-3501	89	97.4	4e-18	88.76
Gibbon	GL397899:25932-26024	93	97.4	4e-18	88.17
Gibbon	10:49359847-49359962	118	95.4	2e-17	85.59
Gibbon	10:49365807-49365906	100	95.4	2e-17	87
Gibbon	X:33759442-33759537	96	95.4	2e-17	87.5
Gibbon	X:35104955-35105070	118	95.4	2e-17	85.59
Gibbon	X:35109595-35109706	112	95.4	2e-17	85.71
Gibbon	X:35150756-35150851	96	95.4	2e-17	87.5
Gibbon	17:49600525-49600592	68	95.4	2e-17	92.65
Gibbon	17:49647663-49647750	88	95.4	2e-17	88.64
Gibbon	6:26257252-26257363	112	95.4	2e-17	85.71
Gibbon	JH996242:122019-122130	112	95.4	2e-17	85.71
Gibbon	JH996242:149562-149677	116	95.4	2e-17	85.34
Gibbon	GL397614:138873-138984	112	95.4	2e-17	85.71
Gibbon	GL397550:486944-487035	92	95.4	2e-17	88.04
Gibbon	GL397550:501244-501361	121	95.4	2e-17	85.12
Gibbon	GL397550:533563-533682	123	95.4	2e-17	84.55
Gibbon	GL397550:548689-548800	112	95.4	2e-17	85.71
Gibbon	GL397534:590883-590975	93	95.4	2e-17	88.17
Gibbon	21:27849494-27849585	92	95.4	2e-17	88.04
Gibbon	ADFV01140151:179-290	112	95.4	2e-17	85.71
Gibbon	GL397899:27456-27567	113	95.4	2e-17	85.84
Gibbon	10:49392937-49393039	103	93.4	7e-17	86.41
Gibbon	X:33749704-33749826	123	93.4	7e-17	84.55
Gibbon	X:35139339-35139461	123	93.4	7e-17	84.55
Gibbon	17:49640468-49640554	87	93.4	7e-17	88.51
Gibbon	6:25523295-25523389	95	93.4	7e-17	87.37
Gibbon	6:26251647-26251757	112	93.4	7e-17	85.71
Gibbon	6:26264021-26264131	112	93.4	7e-17	85.71
Bonobo	19:33304530-33304650	121	121	3e-25	87.6
Bonobo	11:49224546-49224660	115	117	5e-24	87.83
Bonobo	11:49273695-49273813	119	117	5e-24	87.39
Bonobo	11:51075021-51075111	91	117	5e-24	91.21
Bonobo	7:74275342-74275464	125	117	5e-24	87.2
Bonobo	19:33194650-33194772	124	115	2e-23	87.1
Bonobo	7:58831206-58831302	98	113	8e-23	89.8
Bonobo	7:59193835-59193951	117	113	8e-23	87.18
Bonobo	7:58882269-58882380	112	111	3e-22	87.5
Bonobo	KQ412144:319667-319786	121	111	3e-22	86.78
Bonobo	11:49170141-49170255	115	109	1e-21	86.96
Bonobo	11:49263793-49263903	111	109	1e-21	87.39
Bonobo	11:49349683-49349801	119	109	1e-21	86.55
Bonobo	7:58910852-58910954	103	109	1e-21	88.35
Bonobo	X:58891651-58891773	123	109	1e-21	86.18
Bonobo	11:49343199-49343320	122	107	5e-21	86.07
Bonobo	11:49411466-49411579	114	107	5e-21	86.84
Bonobo	11:50597888-50597985	98	107	5e-21	88.78
Bonobo	11:51073470-51073567	98	107	5e-21	88.78
Bonobo	7:58984325-58984414	90	107	5e-21	90
Bonobo	7:75135527-75135648	122	107	5e-21	86.07
Bonobo	11:49353699-49353811	113	105	2e-20	86.73
Bonobo	11:50489167-50489235	69	105	2e-20	94.2
Bonobo	11:50668373-50668461	89	105	2e-20	89.89
Bonobo	11:51111084-51111176	93	105	2e-20	89.25
Bonobo	7:58860923-58861035	113	105	2e-20	86.73
Bonobo	7:59083746-59083838	93	105	2e-20	89.25
Bonobo	KQ412144:325911-326003	93	105	2e-20	89.25
Bonobo	19:33234403-33234498	96	103	8e-20	88.54
Bonobo	11:49406212-49406303	92	103	8e-20	89.13
Bonobo	11:50463277-50463392	116	103	8e-20	86.21
Bonobo	11:50648494-50648585	92	103	8e-20	89.13
Bonobo	11:51088899-51089014	116	103	8e-20	86.21
Bonobo	7:58809227-58809342	116	103	8e-20	86.21
Bonobo	7:58823626-58823709	84	103	8e-20	90.48
Bonobo	7:58834271-58834386	116	103	8e-20	86.21
Bonobo	7:58837686-58837799	116	103	8e-20	86.21
Bonobo	7:58842309-58842424	116	103	8e-20	86.21
Bonobo	7:58845398-58845509	112	103	8e-20	86.61
Bonobo	7:58883640-58883727	88	103	8e-20	89.77
Bonobo	7:58936232-58936323	92	103	8e-20	89.13
Bonobo	7:58964321-58964444	125	103	8e-20	85.6
Bonobo	7:59081066-59081157	92	103	8e-20	89.13
Bonobo	X:58807596-58807711	116	103	8e-20	86.21
Bonobo	X:58868397-58868516	120	103	8e-20	85.83
Bonobo	X:58903828-58903939	113	103	8e-20	86.73
Bonobo	X:58911291-58911410	120	103	8e-20	85.83
Bonobo	12:54217783-54217898	116	103	8e-20	86.21
Bonobo	12:54230902-54231029	128	103	8e-20	85.16
Bonobo	5:69478363-69478452	92	103	8e-20	89.13
Bonobo	4:83355842-83355934	94	103	8e-20	89.36
Bonobo	11:49270996-49271118	123	101	3e-19	85.37
Bonobo	11:49318459-49318581	123	101	3e-19	85.37
Bonobo	11:50429558-50429672	116	101	3e-19	86.21
Bonobo	11:50470744-50470858	116	101	3e-19	86.21
Bonobo	11:50547847-50547969	123	101	3e-19	85.37
Bonobo	11:51119935-51120053	119	101	3e-19	85.71
Bonobo	7:58911852-58911974	125	101	3e-19	85.6
Bonobo	7:58981255-58981369	115	101	3e-19	86.09
Bonobo	7:59001536-59001646	111	101	3e-19	86.49
Bonobo	7:59121311-59121398	89	101	3e-19	89.89
Bonobo	7:59194870-59194961	93	101	3e-19	89.25
Bonobo	X:58877693-58877815	123	101	3e-19	85.37
Bonobo	12:52017208-52017322	115	101	3e-19	86.09
Bonobo	12:54353978-54354069	93	101	3e-19	89.25
Bonobo	5:69448594-69448708	116	101	3e-19	86.21
Bonobo	5:69495792-69495882	91	101	3e-19	89.01
Bonobo	AJFE02005514:188-274	87	101	3e-19	89.66
Bonobo	19:32963582-32963695	115	99.3	1e-18	86.09
Bonobo	19:32968817-32968914	98	99.3	1e-18	87.76
Bonobo	19:33229082-33229167	86	99.3	1e-18	89.53
Bonobo	11:49140126-49140240	116	99.3	1e-18	86.21
Bonobo	11:49168453-49168550	98	99.3	1e-18	87.76
Bonobo	11:49261379-49261472	94	99.3	1e-18	88.3
Bonobo	11:49282870-49282971	102	99.3	1e-18	87.25
Bonobo	11:50557541-50557626	86	99.3	1e-18	89.53
Bonobo	11:50570258-50570343	86	99.3	1e-18	89.53
Bonobo	11:50621842-50621939	98	99.3	1e-18	87.76
Bonobo	7:58821305-58821402	98	99.3	1e-18	87.76
Bonobo	7:58893199-58893296	98	99.3	1e-18	87.76
Bonobo	7:58937604-58937701	98	99.3	1e-18	87.76
Bonobo	7:59136130-59136231	102	99.3	1e-18	87.25
Bonobo	7:59477500-59477585	86	99.3	1e-18	89.53
Bonobo	7:59542436-59542521	86	99.3	1e-18	89.53
Bonobo	7:74380872-74380969	98	99.3	1e-18	87.76
Bonobo	X:58800396-58800517	123	99.3	1e-18	85.37
Bonobo	X:58876520-58876605	86	99.3	1e-18	89.53
Bonobo	12:51945480-51945613	134	99.3	1e-18	84.33
Bonobo	12:51950911-51951008	98	99.3	1e-18	87.76
Bonobo	12:51977430-51977549	123	99.3	1e-18	85.37
Bonobo	12:54339405-54339494	90	99.3	1e-18	88.89
Bonobo	19:33008311-33008371	61	97.4	5e-18	95.08
Bonobo	19:33026781-33026865	86	97.4	5e-18	89.53
Bonobo	19:33052507-33052591	86	97.4	5e-18	89.53
Bonobo	19:33297743-33297835	93	97.4	5e-18	88.17
Bonobo	19:33311696-33311788	93	97.4	5e-18	88.17
Bonobo	11:49226973-49227097	125	97.4	5e-18	84.8
Bonobo	11:49275999-49276119	123	97.4	5e-18	85.37
Bonobo	11:49355101-49355209	109	97.4	5e-18	86.24
Bonobo	11:50453697-50453789	93	97.4	5e-18	88.17
Orangutan	Un:3958813-3958935	126	127	6e-27	88.1
Orangutan	X:59232805-59232920	116	127	6e-27	88.79
Orangutan	1:102842743-102842862	120	127	6e-27	88.33
Orangutan	X:59131220-59131317	98	115	2e-23	89.8
Orangutan	Un:11081910-11082034	125	113	9e-23	86.4
Orangutan	X:59154353-59154449	97	113	9e-23	89.69
Orangutan	X:59260787-59260883	98	113	9e-23	89.8
Orangutan	5:47280786-47280878	93	113	9e-23	90.32
Orangutan	5:47337084-47337172	89	113	9e-23	91.01
Orangutan	Un:10848305-10848420	116	111	3e-22	87.07
Orangutan	Un:31134145-31134260	116	111	3e-22	87.07
Orangutan	Un:38508817-38508932	116	111	3e-22	87.07
Orangutan	X:59232461-59232576	116	111	3e-22	87.07
Orangutan	X:59942583-59942698	116	111	3e-22	87.07
Orangutan	19_random:1370504-1370619	116	111	3e-22	87.07
Orangutan	12_random:993860-993975	116	111	3e-22	87.07
Orangutan	12_random:1135186-1135301	116	111	3e-22	87.07
Orangutan	Un:38517249-38517371	123	109	1e-21	86.18
Orangutan	X:59239048-59239170	123	109	1e-21	86.18
Orangutan	X:59249337-59249451	115	109	1e-21	86.96
Orangutan	X:60029854-60029976	123	109	1e-21	86.18
Orangutan	1:102739324-102739439	117	109	1e-21	87.18
Orangutan	1:102988222-102988344	123	109	1e-21	86.18
Orangutan	Un:1626843-1626964	122	107	5e-21	86.07
Orangutan	Un:3962753-3962846	94	107	5e-21	89.36
Orangutan	X:59147078-59147175	98	107	5e-21	88.78
Orangutan	X:59236348-59236437	90	107	5e-21	90
Orangutan	Un:1658023-1658120	99	105	2e-20	88.89
Orangutan	Un:11151806-11151914	109	105	2e-20	87.16
Orangutan	Un:22934897-22934989	93	105	2e-20	89.25
Orangutan	X:59246246-59246338	93	105	2e-20	89.25
Orangutan	1:102668587-102668707	122	105	2e-20	86.07
Orangutan	12_random:1000290-1000382	93	105	2e-20	89.25
Orangutan	19:24430803-24430895	93	105	2e-20	89.25
Orangutan	16:31512881-31513009	129	105	2e-20	85.27
Orangutan	Un:3916813-3916932	120	103	8e-20	85.83
Orangutan	Un:11191957-11192072	116	103	8e-20	86.21
Orangutan	Un:63145418-63145509	92	103	8e-20	89.13
Orangutan	Un:70943956-70944071	116	103	8e-20	86.21
Orangutan	X:59169691-59169824	136	103	8e-20	85.29
Orangutan	X:59209922-59210041	120	103	8e-20	85.83
Orangutan	X:59246762-59246877	116	103	8e-20	86.21
Orangutan	X:59963505-59963620	116	103	8e-20	86.21
Orangutan	1:102768271-102768386	116	103	8e-20	86.21
Orangutan	1:102777594-102777698	106	103	8e-20	87.74
Orangutan	1:103006081-103006168	88	103	8e-20	89.77
Orangutan	5:47239219-47239334	116	103	8e-20	86.21
Orangutan	5:47264000-47264089	92	103	8e-20	89.13
Orangutan	5:47271506-47271593	88	103	8e-20	89.77
Orangutan	5:47551248-47551363	116	103	8e-20	86.21
Orangutan	12_random:543908-544023	116	103	8e-20	86.21
Orangutan	12_random:1224744-1224859	116	103	8e-20	86.21
Orangutan	12_random:2112187-2112278	92	103	8e-20	89.13
Orangutan	19:24353546-24353674	130	103	8e-20	85.38
Orangutan	2b_random:3180223-3180314	92	103	8e-20	89.13
Orangutan	5_random:544822-544937	116	103	8e-20	86.21
Orangutan	5_random:587229-587344	116	103	8e-20	86.21
Orangutan	5_random:771370-771485	116	103	8e-20	86.21
Orangutan	12:35544510-35544625	116	103	8e-20	86.21
Orangutan	12:35676921-35677036	116	103	8e-20	86.21
Orangutan	9:19706785-19706900	116	103	8e-20	86.21
Orangutan	Un:2634779-2634865	87	101	3e-19	89.66
Orangutan	Un:2727345-2727459	116	101	3e-19	86.21
Orangutan	Un:2727862-2727976	115	101	3e-19	86.09
Orangutan	Un:10794965-10795083	119	101	3e-19	85.71
Orangutan	Un:10846668-10846782	115	101	3e-19	86.09
Orangutan	Un:22929619-22929701	83	101	3e-19	90.36
Orangutan	Un:38522814-38522896	83	101	3e-19	90.36
Orangutan	X:59261814-59261936	123	101	3e-19	85.37
Orangutan	X:60032768-60032890	123	101	3e-19	85.37
Orangutan	X:60326994-60327116	123	101	3e-19	85.37
Orangutan	1:102758186-102758308	123	101	3e-19	85.37
Orangutan	5:47270820-47270935	117	101	3e-19	86.32
Orangutan	5:47602601-47602715	115	101	3e-19	86.09
Orangutan	19:24378752-24378874	123	101	3e-19	85.37
Orangutan	19:24379442-24379564	125	101	3e-19	85.6
Orangutan	19:24445761-24445871	112	101	3e-19	86.61
Orangutan	16:31413034-31413156	123	101	3e-19	85.37
Orangutan	16:31439982-31440100	119	101	3e-19	85.71
Orangutan	6:61692568-61692698	134	101	3e-19	85.07
Orangutan	Un:2614014-2614107	94	99.3	1e-18	88.3
Orangutan	Un:3934315-3934412	98	99.3	1e-18	87.76
Orangutan	Un:10730260-10730357	98	99.3	1e-18	87.76
Orangutan	Un:10738242-10738339	98	99.3	1e-18	87.76
Orangutan	Un:10842158-10842247	90	99.3	1e-18	88.89
Orangutan	Un:10847380-10847465	86	99.3	1e-18	89.53
Orangutan	Un:11025530-11025627	98	99.3	1e-18	87.76
Orangutan	Un:11131892-11131981	90	99.3	1e-18	88.89
Orangutan	Un:16215785-16215898	115	99.3	1e-18	86.09
Orangutan	Un:22931940-22932028	91	99.3	1e-18	89.01
Orangutan	Un:31090720-31090805	86	99.3	1e-18	89.53
Orangutan	Un:38520245-38520333	91	99.3	1e-18	89.01
Orangutan	Un:38623434-38623547	114	99.3	1e-18	85.96
Orangutan	Un:63210245-63210358	114	99.3	1e-18	85.96
Orangutan	X:59133802-59133887	86	99.3	1e-18	89.53
Orangutan	X:59136009-59136098	90	99.3	1e-18	88.89
Orangutan	X:59181256-59181357	102	99.3	1e-18	87.25
Orangutan	X:59943668-59943757	90	99.3	1e-18	88.89
Orangutan	X:60087471-60087560	90	99.3	1e-18	88.89
Orangutan	1:102985819-102985940	122	99.3	1e-18	85.25
Vervet-AGM	KE148110:65419-65734	316	395	6e-108	90.82
Vervet-AGM	KE147655:15741-16045	305	380	3e-103	90.82
Vervet-AGM	KE147557:17168-17463	296	380	3e-103	91.22
Vervet-AGM	7:16888964-16889266	303	378	1e-102	90.76
Vervet-AGM	12:16795631-16795944	316	376	5e-102	90.19
Vervet-AGM	KE147655:20940-21247	308	372	8e-101	90.26
Vervet-AGM	AQIB01159050:322-637	316	372	8e-101	89.87
Vervet-AGM	KE147568:2125-2428	305	372	8e-101	90.49
Vervet-AGM	15:26479815-26480130	316	372	8e-101	89.87
Vervet-AGM	KE147655:7715-8029	316	370	3e-100	89.87
Vervet-AGM	15:27487032-27487346	316	370	3e-100	89.87
Vervet-AGM	KE147702:399-701	303	370	3e-100	90.43
Vervet-AGM	KE147654:12964-13278	316	370	3e-100	89.87
Vervet-AGM	KE147619:1410-1712	304	370	3e-100	90.46
Vervet-AGM	KE147552:11353-11643	292	370	3e-100	91.1
Vervet-AGM	KE147979:26742-27056	316	370	3e-100	89.87
Vervet-AGM	KE147655:1581-1894	315	368	1e-99	89.84
Vervet-AGM	12:16789128-16789429	303	368	1e-99	90.43
Vervet-AGM	KE147550:157109-157405	298	366	5e-99	90.6
Vervet-AGM	KE147543:17942-18246	305	366	5e-99	90.16
Vervet-AGM	12:16794429-16794744	316	364	2e-98	89.56
Vervet-AGM	AQIB01159050:10447-10762	316	364	2e-98	89.56
Vervet-AGM	15:27484978-27485293	316	364	2e-98	89.56
Vervet-AGM	KE147619:26300-26615	316	364	2e-98	89.56
Vervet-AGM	KE147543:14080-14387	308	364	2e-98	89.94
Vervet-AGM	KE147763:2657-2972	316	364	2e-98	89.56
Vervet-AGM	KE147638:11377-11692	316	364	2e-98	89.56
Vervet-AGM	KE147625:2607-2922	316	364	2e-98	89.56
Vervet-AGM	18:26252624-26252939	316	364	2e-98	89.56
Vervet-AGM	KE147550:200329-200644	317	362	8e-98	89.59
Vervet-AGM	AQIB01158418:517-812	298	362	8e-98	90.6
Vervet-AGM	AQIB01156959:12902-13216	315	362	8e-98	89.52
Vervet-AGM	KE147545:1278-1580	303	362	8e-98	90.1
Vervet-AGM	27:1022515-1022825	313	362	8e-98	89.78
Vervet-AGM	11:34372369-34372675	308	362	8e-98	89.94
Vervet-AGM	KE147550:205860-206161	302	360	3e-97	90.07
Vervet-AGM	KE147550:214146-214463	320	360	3e-97	89.69
Vervet-AGM	12:16791516-16791831	316	356	5e-96	89.24
Vervet-AGM	12:16811191-16811506	316	356	5e-96	89.24
Vervet-AGM	KE147568:10867-11170	305	356	5e-96	89.84
Vervet-AGM	18:26226844-26227159	316	356	5e-96	89.24
Vervet-AGM	18:26270196-26270491	297	356	5e-96	90.24
Vervet-AGM	11:34369281-34369584	304	356	5e-96	89.8
Vervet-AGM	11:34370653-34370960	308	356	5e-96	89.61
Vervet-AGM	6:22660685-22660980	297	356	5e-96	90.24
Vervet-AGM	4:46095831-46096134	305	356	5e-96	89.84
Vervet-AGM	12:16829808-16830110	303	354	2e-95	89.77
Vervet-AGM	KE147702:2463-2753	291	354	2e-95	90.38
Vervet-AGM	KE147625:26240-26554	315	354	2e-95	89.21
Vervet-AGM	5:29289269-29289571	303	354	2e-95	89.77
Vervet-AGM	7:16818348-16818661	314	352	7e-95	89.17
Vervet-AGM	15:26478272-26478586	317	352	7e-95	89.27
Vervet-AGM	KE147552:6043-6340	299	352	7e-95	89.97
Vervet-AGM	18:26230579-26230878	302	352	7e-95	90.07
Vervet-AGM	KE147670:12697-12982	286	352	7e-95	90.56
Vervet-AGM	KE147542:35668-35970	304	352	7e-95	89.8
Vervet-AGM	KE148110:5123-5416	295	350	3e-94	90.17
Vervet-AGM	KE147693:5781-6078	300	350	3e-94	90
Vervet-AGM	KE147693:12157-12454	300	350	3e-94	90
Vervet-AGM	KE147551:178045-178341	297	350	3e-94	89.9
Vervet-AGM	KE147655:1068-1383	316	348	1e-93	88.92
Vervet-AGM	12:16783309-16783596	288	348	1e-93	90.28
Vervet-AGM	KE147550:206190-206505	316	348	1e-93	88.92
Vervet-AGM	27:1028145-1028460	316	348	1e-93	88.92
Vervet-AGM	11:34367573-34367868	297	348	1e-93	89.9
Vervet-AGM	AQIB01158992:4620-4927	308	348	1e-93	89.29
Vervet-AGM	KE147743:8654-8953	301	348	1e-93	89.7
Vervet-AGM	KE147644:19064-19379	316	348	1e-93	88.92
Vervet-AGM	KE147622:24028-24343	316	348	1e-93	88.92
Vervet-AGM	20:1025293-1025608	316	348	1e-93	88.92
Vervet-AGM	1:59414933-59415232	300	348	1e-93	89.67
Vervet-AGM	KE147655:17156-17470	316	346	4e-93	88.92
Vervet-AGM	7:16897178-16897493	317	346	4e-93	88.96
Vervet-AGM	12:16792563-16792861	300	346	4e-93	89.67
Vervet-AGM	AQIB01159050:3870-4176	308	346	4e-93	89.29
Vervet-AGM	15:26474779-26475094	317	346	4e-93	88.96
Vervet-AGM	KE147550:204822-205137	317	346	4e-93	88.96
Vervet-AGM	KE147543:43617-43931	316	346	4e-93	88.92
Vervet-AGM	KE147638:3484-3782	299	346	4e-93	89.63
Vervet-AGM	KE147625:31723-32037	315	346	4e-93	88.89
Vervet-AGM	18:26264453-26264751	299	346	4e-93	89.63
Vervet-AGM	11:34378528-34378835	309	346	4e-93	89.32
Vervet-AGM	5:29273265-29273580	317	346	4e-93	88.96
Vervet-AGM	KE147542:29000-29286	287	346	4e-93	90.24
Vervet-AGM	KE147542:70040-70355	317	346	4e-93	88.96
Vervet-AGM	KE147542:70900-71202	303	346	4e-93	89.44
Vervet-AGM	KE147644:17348-17643	297	346	4e-93	89.9
Vervet-AGM	20:1006125-1006439	315	346	4e-93	88.89
Vervet-AGM	KE147686:5935-6221	288	346	4e-93	90.28
Vervet-AGM	KE147667:11947-12246	300	346	4e-93	89.67
Vervet-AGM	KE147558:1612-1926	315	346	4e-93	88.89
Vervet-AGM	KE147655:19529-19842	314	344	2e-92	88.85
Vervet-AGM	7:16848232-16848537	306	344	2e-92	89.22
Vervet-AGM	AQIB01159050:1-294	294	344	2e-92	89.8
Vervet-AGM	KE147550:191421-191715	296	344	2e-92	89.86
Vervet-AGM	27:1024407-1024697	292	344	2e-92	90.07
Vervet-AGM	5:29285340-29285645	308	344	2e-92	89.29
Vervet-AGM	KE147542:36181-36478	298	344	2e-92	89.6
Vervet-AGM	20:1017372-1017665	296	344	2e-92	89.86
Vervet-AGM	KE147558:10001-10315	318	344	2e-92	88.99
Gelada	QGDE01012319:417-732	316	609	3e-172	99.37
Gelada	QGDE01010450:387-702	316	593	2e-167	98.73
Gelada	QGDE01009781:1314-1628	316	591	8e-167	98.73
Gelada	QGDE01008202:119-433	316	591	8e-167	98.73
Gelada	QGDE01012309:914-1229	316	585	5e-165	98.42
Gelada	QGDE01010664:638-953	316	585	5e-165	98.42
Gelada	QGDE01008891:1148-1463	316	585	5e-165	98.42
Gelada	QGDE01008595:574-889	316	585	5e-165	98.42
Gelada	QGDE01008181:591-906	316	585	5e-165	98.42
Gelada	QGDE01007523:1249-1564	316	585	5e-165	98.42
Gelada	QGDE01005968:2258-2573	316	585	5e-165	98.42
Gelada	QGDE01005640:1979-2294	316	585	5e-165	98.42
Gelada	QGDE01003715:3891-4206	316	585	5e-165	98.42
Gelada	QGDE01003454:3061-3376	316	585	5e-165	98.42
Gelada	QGDE01002396:1137-1452	316	585	5e-165	98.42
Gelada	QGDE01002396:4281-4596	316	585	5e-165	98.42
Gelada	QGDE01002013:336-647	312	585	5e-165	98.72
Gelada	8:45208604-45208919	316	585	5e-165	98.42
Gelada	8:45534310-45534624	315	583	2e-164	98.41
Gelada	8:45573093-45573407	316	583	2e-164	98.42
Gelada	QGDE01007792:566-875	310	581	7e-164	98.71
Gelada	8:45439009-45439321	313	579	3e-163	98.4
Gelada	8:44766532-44766847	316	577	1e-162	98.1
Gelada	8:44869941-44870256	316	577	1e-162	98.1
Gelada	8:44984383-44984694	312	577	1e-162	98.4
Gelada	8:45196994-45197309	316	577	1e-162	98.1
Gelada	8:45600909-45601224	316	577	1e-162	98.1
Gelada	8:45693828-45694143	316	577	1e-162	98.1
Gelada	8:45868380-45868695	316	577	1e-162	98.1
Gelada	8:45908679-45908994	316	577	1e-162	98.1
Gelada	QGDE01014688:370-685	316	577	1e-162	98.1
Gelada	QGDE01014114:275-590	316	577	1e-162	98.1
Gelada	QGDE01012980:496-811	316	577	1e-162	98.1
Gelada	QGDE01011769:298-613	316	577	1e-162	98.1
Gelada	QGDE01010766:503-818	316	577	1e-162	98.1
Gelada	QGDE01010307:1076-1391	316	577	1e-162	98.1
Gelada	QGDE01009697:1333-1648	316	577	1e-162	98.1
Gelada	QGDE01009419:190-505	316	577	1e-162	98.1
Gelada	QGDE01008919:1474-1789	316	577	1e-162	98.1
Gelada	QGDE01008376:403-718	316	577	1e-162	98.1
Gelada	QGDE01008376:1408-1723	316	577	1e-162	98.1
Gelada	QGDE01008314:669-984	316	577	1e-162	98.1
Gelada	QGDE01008292:713-1028	316	577	1e-162	98.1
Gelada	QGDE01008229:643-958	316	577	1e-162	98.1
Gelada	QGDE01008206:1278-1594	317	577	1e-162	98.11
Gelada	QGDE01007261:1887-2202	316	577	1e-162	98.1
Gelada	QGDE01006827:38-353	316	577	1e-162	98.1
Gelada	QGDE01006816:1227-1542	316	577	1e-162	98.1
Gelada	QGDE01006729:511-826	316	577	1e-162	98.1
Gelada	QGDE01005218:1889-2204	316	577	1e-162	98.1
Gelada	QGDE01004819:3215-3526	312	577	1e-162	98.4
Gelada	QGDE01004340:1848-2163	316	577	1e-162	98.1
Gelada	QGDE01004274:160-475	316	577	1e-162	98.1
Gelada	QGDE01004275:160-475	316	577	1e-162	98.1
Gelada	QGDE01004139:1716-2031	316	577	1e-162	98.1
Gelada	QGDE01003638:2402-2717	316	577	1e-162	98.1
Gelada	QGDE01003396:3830-4145	316	577	1e-162	98.1
Gelada	QGDE01002875:4155-4470	316	577	1e-162	98.1
Gelada	QGDE01002590:3714-4029	316	577	1e-162	98.1
Gelada	QGDE01002584:4253-4568	316	577	1e-162	98.1
Gelada	QGDE01002571:349-664	316	577	1e-162	98.1
Gelada	QGDE01002571:3431-3746	316	577	1e-162	98.1
Gelada	QGDE01001902:2702-3017	316	577	1e-162	98.1
Gelada	QGDE01000793:5166-5477	312	577	1e-162	98.4
Gelada	QGDE01000792:5166-5477	312	577	1e-162	98.4
Gelada	QGDE01000743:6003-6318	316	577	1e-162	98.1
Gelada	QGDE01000739:4288-4603	316	577	1e-162	98.1
Gelada	8:45161510-45161824	315	575	4e-162	98.1
Gelada	QGDE01011004:712-1026	315	575	4e-162	98.1
Gelada	QGDE01009017:1070-1384	315	575	4e-162	98.1
Gelada	QGDE01008359:86-400	315	575	4e-162	98.1
Gelada	QGDE01007777:1858-2172	315	575	4e-162	98.1
Gelada	QGDE01007498:330-644	316	575	4e-162	98.1
Gelada	QGDE01005712:1896-2210	316	575	4e-162	98.1
Gelada	QGDE01005136:673-987	315	575	4e-162	98.1
Gelada	QGDE01004781:2192-2506	316	575	4e-162	98.1
Gelada	QGDE01004412:2220-2534	316	575	4e-162	98.1
Gelada	QGDE01002224:436-750	315	575	4e-162	98.1
Gelada	QGDE01002224:3520-3835	317	575	4e-162	98.11
Gelada	12:16673514-16673828	315	575	4e-162	98.1
Gelada	8:45105460-45105773	314	573	2e-161	98.09
Gelada	QGDE01013067:429-742	314	573	2e-161	98.09
Gelada	QGDE01013006:244-557	314	573	2e-161	98.09
Gelada	QGDE01012490:508-821	314	573	2e-161	98.09
Gelada	QGDE01010952:784-1097	314	573	2e-161	98.09
Gelada	QGDE01008172:841-1154	315	573	2e-161	98.1
Gelada	QGDE01007073:785-1098	314	573	2e-161	98.09
Gelada	QGDE01004571:2895-3208	314	573	2e-161	98.09
Gelada	QGDE01003355:4507-4820	314	573	2e-161	98.09
Gelada	QGDE01002310:1635-1948	315	573	2e-161	98.1
Gelada	8:44714927-44715239	313	571	7e-161	98.08
Gelada	QGDE01010411:127-439	313	571	7e-161	98.08
Gelada	QGDE01006480:2084-2396	313	571	7e-161	98.08
Gelada	QGDE01006023:1660-1972	313	571	7e-161	98.08
Gelada	QGDE01003866:183-495	313	571	7e-161	98.08
Gelada	QGDE01002803:205-517	314	571	7e-161	98.09
Gelada	8:44119204-44119519	316	569	3e-160	97.78
Gelada	8:44809857-44810172	316	569	3e-160	97.78
Gelada	8:44831532-44831847	316	569	3e-160	97.78
Gelada	8:44859521-44859836	316	569	3e-160	97.78
Ugandan red Colobus	PDMG02001464:8156982-8157294	315	267	3e-69	85.71
Ugandan red Colobus	PDMG02001150:111038-111199	162	217	2e-54	91.98
Ugandan red Colobus	PDMG02001464:8148743-8148982	240	213	3e-53	86.25
Ugandan red Colobus	PDMG02001464:8145332-8145543	212	206	8e-51	87.26
Ugandan red Colobus	PDMG02030259:69970-70133	164	206	8e-51	90.85
Ugandan red Colobus	PDMG02024825:35499-35693	195	204	3e-50	88.21
Ugandan red Colobus	PDMG02000094:28791909-28792107	199	204	3e-50	87.94
Ugandan red Colobus	PDMG02025503:6457-6654	198	202	1e-49	87.88
Ugandan red Colobus	PDMG02025503:10871-11068	198	202	1e-49	87.88
Ugandan red Colobus	PDMG02025503:17294-17454	161	200	5e-49	90.68
Ugandan red Colobus	PDMG02029822:10901-11065	165	198	2e-48	90.3
Ugandan red Colobus	PDMG02014283:3200-3363	164	198	2e-48	90.24
Ugandan red Colobus	PDMG02001070:155496-155659	164	198	2e-48	90.24
Ugandan red Colobus	PDMG02001592:3942-4105	164	198	2e-48	90.24
Ugandan red Colobus	PDMG02022193:35503-35697	195	196	8e-48	87.69
Ugandan red Colobus	PDMG02023744:16379-16542	165	196	8e-48	90.3
Ugandan red Colobus	PDMG02001082:29866-30028	163	196	8e-48	90.18
Ugandan red Colobus	PDMG02016788:60125-60322	198	194	3e-47	87.37
Ugandan red Colobus	PDMG02001032:21742-21939	198	194	3e-47	87.37
Ugandan red Colobus	PDMG02001079:482173-482370	198	194	3e-47	87.37
Ugandan red Colobus	PDMG02001053:28262-28459	198	194	3e-47	87.37
Ugandan red Colobus	PDMG02000094:28854992-28855152	161	192	1e-46	90.06
Ugandan red Colobus	PDMG02040172:1353-1513	161	192	1e-46	90.06
Ugandan red Colobus	PDMG02040171:774-934	161	192	1e-46	90.06
Ugandan red Colobus	PDMG02040020:1353-1513	161	192	1e-46	90.06
Ugandan red Colobus	PDMG02040019:774-934	161	192	1e-46	90.06
Ugandan red Colobus	PDMG02001464:8152992-8153183	192	190	5e-46	87.5
Ugandan red Colobus	PDMG02001464:8163562-8163717	156	190	5e-46	90.38
Ugandan red Colobus	PDMG02018920:188-383	196	190	5e-46	87.24
Ugandan red Colobus	PDMG02030697:4491-4654	164	190	5e-46	89.63
Ugandan red Colobus	PDMG02025477:41942-42105	164	190	5e-46	89.63
Ugandan red Colobus	PDMG02024216:58743-58906	164	190	5e-46	89.63
Ugandan red Colobus	PDMG02001569:254875-255038	164	190	5e-46	89.63
Ugandan red Colobus	PDMG02000346:4352216-4352379	164	190	5e-46	89.63
Ugandan red Colobus	PDMG02000120:958994-959157	164	190	5e-46	89.63
Ugandan red Colobus	PDMG02000013:451878-452053	176	190	5e-46	88.64
Ugandan red Colobus	PDMG02001464:8165052-8165250	199	188	2e-45	86.93
Ugandan red Colobus	PDMG02024825:27859-28021	163	188	2e-45	89.57
Ugandan red Colobus	PDMG02022193:27862-28024	163	188	2e-45	89.57
Ugandan red Colobus	PDMG02024216:57043-57205	164	188	2e-45	89.63
Ugandan red Colobus	PDMG02036623:1438-1600	163	188	2e-45	89.57
Ugandan red Colobus	PDMG02036622:240-402	163	188	2e-45	89.57
Ugandan red Colobus	PDMG02032116:7138-7340	203	188	2e-45	86.7
Ugandan red Colobus	PDMG02031706:145496-145658	163	188	2e-45	89.57
Ugandan red Colobus	PDMG02029696:76862-77048	188	188	2e-45	87.77
Ugandan red Colobus	PDMG02001464:8333038-8333235	198	186	7e-45	86.87
Ugandan red Colobus	PDMG02001070:306378-306539	163	186	7e-45	89.57
Ugandan red Colobus	PDMG02023744:14170-14332	164	186	7e-45	89.63
Ugandan red Colobus	PDMG02001079:198114-198311	198	186	7e-45	86.87
Ugandan red Colobus	PDMG02001079:200493-200682	190	186	7e-45	87.37
Ugandan red Colobus	PDMG02000120:51915-52112	198	186	7e-45	86.87
Ugandan red Colobus	PDMG02000120:1327563-1327724	162	186	7e-45	89.51
Ugandan red Colobus	PDMG02040858:2776-2938	165	186	7e-45	89.7
Ugandan red Colobus	PDMG02040857:304-466	165	186	7e-45	89.7
Ugandan red Colobus	PDMG02023248:2307-2500	194	186	7e-45	87.11
Ugandan red Colobus	PDMG02023248:4177-4370	194	186	7e-45	87.11
Ugandan red Colobus	PDMG02032945:6321-6474	154	186	7e-45	90.26
Ugandan red Colobus	PDMG02000645:159203-159364	164	186	7e-45	89.63
Ugandan red Colobus	PDMG02029736:243829-244026	200	186	7e-45	87
Ugandan red Colobus	PDMG02001464:8159171-8159379	209	184	3e-44	86.12
Ugandan red Colobus	PDMG02000120:961203-961363	161	184	3e-44	89.44
Ugandan red Colobus	PDMG02000094:28822257-28822420	164	182	1e-43	89.02
Ugandan red Colobus	PDMG02001070:311476-311639	164	182	1e-43	89.02
Ugandan red Colobus	PDMG02000346:4084844-4085019	176	182	1e-43	88.07
Ugandan red Colobus	PDMG02000120:35557-35712	156	182	1e-43	89.74
Ugandan red Colobus	PDMG02000120:1330294-1330457	164	182	1e-43	89.02
Ugandan red Colobus	PDMG02029696:448395-448558	164	182	1e-43	89.02
Ugandan red Colobus	PDMG02003982:1368-1531	164	182	1e-43	89.02
Ugandan red Colobus	PDMG02040920:1720-1883	164	182	1e-43	89.02
Ugandan red Colobus	PDMG02040919:1061-1224	164	182	1e-43	89.02
Ugandan red Colobus	PDMG02010722:2078-2241	164	182	1e-43	89.02
Ugandan red Colobus	PDMG02028621:4580-4777	200	182	1e-43	87
Ugandan red Colobus	PDMG02028621:40806-41003	200	182	1e-43	87
Ugandan red Colobus	PDMG02029702:56472-56635	164	182	1e-43	89.02
Ugandan red Colobus	PDMG02026228:242359-242522	164	182	1e-43	89.02
Ugandan red Colobus	PDMG02001031:64068-64231	164	182	1e-43	89.02
Ugandan red Colobus	PDMG02000754:331996-332204	210	182	1e-43	86.19
Ugandan red Colobus	PDMG02000291:6985316-6985471	156	182	1e-43	89.74
Ugandan red Colobus	PDMG02000291:6986502-6986657	156	182	1e-43	89.74
Ugandan red Colobus	PDMG02000114:25160098-25160273	176	182	1e-43	88.07
Ugandan red Colobus	PDMG02000114:25160301-25160464	164	182	1e-43	89.02
Ugandan red Colobus	PDMG02001464:8165290-8165453	165	180	5e-43	89.09
Ugandan red Colobus	PDMG02000094:28827326-28827520	195	180	5e-43	86.67
Ugandan red Colobus	PDMG02014283:4187-4350	165	180	5e-43	89.09
Ugandan red Colobus	PDMG02016788:15870-16032	164	180	5e-43	89.02
Ugandan red Colobus	PDMG02016788:19139-19301	164	180	5e-43	89.02
Ugandan red Colobus	PDMG02024216:72883-73045	163	180	5e-43	88.96
Ugandan red Colobus	PDMG02032441:582-744	164	180	5e-43	89.02
Ugandan red Colobus	PDMG02022930:7583-7739	159	180	5e-43	89.31
Ugandan red Colobus	PDMG02045103:17717-17879	163	180	5e-43	88.96
Ugandan red Colobus	PDMG02045102:6649-6811	163	180	5e-43	88.96
Ugandan red Colobus	PDMG02030807:35414-35600	187	180	5e-43	87.17
Ugandan red Colobus	PDMG02025478:38588-38746	160	180	5e-43	89.38
Ugandan red Colobus	PDMG02001953:7364-7567	204	180	5e-43	86.27
Ugandan red Colobus	PDMG02001150:232139-232304	166	178	2e-42	88.55
Ugandan red Colobus	PDMG02001150:233844-234005	162	178	2e-42	88.89
Ugandan red Colobus	PDMG02000094:28582706-28582903	198	178	2e-42	86.36
Ugandan red Colobus	PDMG02000094:28820519-28820716	198	178	2e-42	86.36
Ugandan red Colobus	PDMG02001082:344843-345005	164	178	2e-42	89.02
Ugandan red Colobus	PDMG02001032:20075-20236	162	178	2e-42	88.89
Rhesus macaque	QNVO02002435:285-600	316	625	6e-177	100
Rhesus macaque	QNVO02002435:628-943	316	625	6e-177	100
Rhesus macaque	QNVO02002435:969-1284	316	625	6e-177	100
Rhesus macaque	QNVO02002248:928-1243	316	625	6e-177	100
Rhesus macaque	QNVO02002446:371-686	316	625	6e-177	100
Rhesus macaque	QNVO02002514:1239-1554	316	625	6e-177	100
Rhesus macaque	QNVO02001379:2433-2748	316	625	6e-177	100
Rhesus macaque	QNVO02002557:2016-2331	316	625	6e-177	100
Rhesus macaque	QNVO02002557:2359-2674	316	625	6e-177	100
Rhesus macaque	QNVO02001961:1060-1375	316	625	6e-177	100
Rhesus macaque	QNVO02002026:666-981	316	625	6e-177	100
Rhesus macaque	QNVO02002026:1346-1661	316	625	6e-177	100
Rhesus macaque	QNVO02002026:2710-3025	316	625	6e-177	100
Rhesus macaque	QNVO02002026:3737-4052	316	625	6e-177	100
Rhesus macaque	QNVO02002026:4424-4739	316	625	6e-177	100
Rhesus macaque	QNVO02002044:3019-3334	316	625	6e-177	100
Rhesus macaque	QNVO02002044:4726-5041	316	625	6e-177	100
Rhesus macaque	QNVO02002597:570-885	316	625	6e-177	100
Rhesus macaque	QNVO02002597:913-1228	316	625	6e-177	100
Rhesus macaque	QNVO02002597:1256-1571	316	625	6e-177	100
Rhesus macaque	QNVO02002597:1599-1914	316	625	6e-177	100
Rhesus macaque	QNVO02002597:1942-2257	316	625	6e-177	100
Rhesus macaque	QNVO02002597:2285-2600	316	625	6e-177	100
Rhesus macaque	QNVO02002597:2628-2943	316	625	6e-177	100
Rhesus macaque	QNVO02002597:2971-3286	316	625	6e-177	100
Rhesus macaque	QNVO02002597:3314-3629	316	625	6e-177	100
Rhesus macaque	QNVO02002597:3657-3972	316	625	6e-177	100
Rhesus macaque	QNVO02002597:4000-4315	316	625	6e-177	100
Rhesus macaque	QNVO02002597:4343-4658	316	625	6e-177	100
Rhesus macaque	QNVO02002597:5028-5343	316	625	6e-177	100
Rhesus macaque	QNVO02002094:2194-2509	316	625	6e-177	100
Rhesus macaque	QNVO02002138:1312-1627	316	625	6e-177	100
Rhesus macaque	QNVO02002138:3019-3334	316	625	6e-177	100
Rhesus macaque	QNVO02002138:3362-3677	316	625	6e-177	100
Rhesus macaque	QNVO02002122:4948-5263	316	625	6e-177	100
Rhesus macaque	QNVO02002613:4073-4388	316	625	6e-177	100
Rhesus macaque	QNVO02002228:2045-2360	316	625	6e-177	100
Rhesus macaque	QNVO02002277:51-366	316	625	6e-177	100
Rhesus macaque	QNVO02002277:1081-1396	316	625	6e-177	100
Rhesus macaque	QNVO02002277:1424-1739	316	625	6e-177	100
Rhesus macaque	QNVO02002277:1767-2082	316	625	6e-177	100
Rhesus macaque	QNVO02002277:2110-2425	316	625	6e-177	100
Rhesus macaque	QNVO02002277:2453-2768	316	625	6e-177	100
Rhesus macaque	QNVO02002277:2796-3111	316	625	6e-177	100
Rhesus macaque	QNVO02002277:3139-3454	316	625	6e-177	100
Rhesus macaque	QNVO02002277:3482-3797	316	625	6e-177	100
Rhesus macaque	QNVO02002277:4165-4480	316	625	6e-177	100
Rhesus macaque	QNVO02002277:4508-4823	316	625	6e-177	100
Rhesus macaque	QNVO02002277:4851-5166	316	625	6e-177	100
Rhesus macaque	QNVO02002611:2698-3013	316	625	6e-177	100
Rhesus macaque	QNVO02002611:3041-3356	316	625	6e-177	100
Rhesus macaque	QNVO02002611:4065-4380	316	625	6e-177	100
Rhesus macaque	QNVO02002611:5092-5407	316	625	6e-177	100
Rhesus macaque	QNVO02002461:1485-1800	316	625	6e-177	100
Rhesus macaque	QNVO02002477:1391-1706	316	625	6e-177	100
Rhesus macaque	QNVO02002477:3443-3758	316	625	6e-177	100
Rhesus macaque	QNVO02002477:4466-4781	316	625	6e-177	100
Rhesus macaque	QNVO02002496:692-1007	316	625	6e-177	100
Rhesus macaque	QNVO02002496:1035-1350	316	625	6e-177	100
Rhesus macaque	QNVO02002496:1378-1693	316	625	6e-177	100
Rhesus macaque	QNVO02002496:1721-2036	316	625	6e-177	100
Rhesus macaque	QNVO02002496:2064-2379	316	625	6e-177	100
Rhesus macaque	QNVO02002496:2407-2722	316	625	6e-177	100
Rhesus macaque	QNVO02002496:2750-3065	316	625	6e-177	100
Rhesus macaque	QNVO02002496:3093-3408	316	625	6e-177	100
Rhesus macaque	QNVO02002496:3436-3751	316	625	6e-177	100
Rhesus macaque	QNVO02002496:3779-4094	316	625	6e-177	100
Rhesus macaque	QNVO02002496:4122-4437	316	625	6e-177	100
Rhesus macaque	QNVO02002496:4465-4780	316	625	6e-177	100
Rhesus macaque	QNVO02002496:4808-5123	316	625	6e-177	100
Rhesus macaque	QNVO02002496:5151-5466	316	625	6e-177	100
Rhesus macaque	QNVO02002496:5494-5809	316	625	6e-177	100
Rhesus macaque	QNVO02002520:4218-4533	316	625	6e-177	100
Rhesus macaque	QNVO02002504:2254-2569	316	625	6e-177	100
Rhesus macaque	QNVO02002504:2597-2912	316	625	6e-177	100
Rhesus macaque	QNVO02002504:2940-3255	316	625	6e-177	100
Rhesus macaque	QNVO02002504:3283-3598	316	625	6e-177	100
Rhesus macaque	QNVO02002504:4310-4625	316	625	6e-177	100
Rhesus macaque	QNVO02002504:4994-5309	316	625	6e-177	100
Rhesus macaque	QNVO02002504:5337-5652	316	625	6e-177	100
Rhesus macaque	QNVO02002504:5680-5995	316	625	6e-177	100
Rhesus macaque	QNVO02002521:713-1028	316	625	6e-177	100
Rhesus macaque	QNVO02002521:1056-1371	316	625	6e-177	100
Rhesus macaque	QNVO02002521:4104-4419	316	625	6e-177	100
Rhesus macaque	QNVO02002521:4789-5104	316	625	6e-177	100
Rhesus macaque	QNVO02002528:670-985	316	625	6e-177	100
Rhesus macaque	QNVO02002528:2378-2693	316	625	6e-177	100
Rhesus macaque	QNVO02002528:3063-3378	316	625	6e-177	100
Rhesus macaque	QNVO02002528:3406-3721	316	625	6e-177	100
Rhesus macaque	QNVO02002528:3749-4064	316	625	6e-177	100
Rhesus macaque	QNVO02002528:4092-4407	316	625	6e-177	100
Rhesus macaque	QNVO02002528:4435-4750	316	625	6e-177	100
Rhesus macaque	QNVO02002528:4778-5093	316	625	6e-177	100
Rhesus macaque	QNVO02002528:5121-5436	316	625	6e-177	100
Rhesus macaque	QNVO02002531:725-1040	316	625	6e-177	100
Rhesus macaque	QNVO02002531:1068-1383	316	625	6e-177	100
Rhesus macaque	QNVO02002531:1411-1726	316	625	6e-177	100
Rhesus macaque	QNVO02002531:1754-2069	316	625	6e-177	100
Rhesus macaque	QNVO02002531:2097-2412	316	625	6e-177	100
Rhesus macaque	QNVO02002531:2440-2755	316	625	6e-177	100
Gorilla	6:59734856-59734978	123	125	2e-26	87.8
Gorilla	11:54165797-54165910	114	115	2e-23	87.72
Gorilla	X:58889411-58889507	98	113	8e-23	89.8
Gorilla	11:54106024-54106127	104	111	3e-22	88.46
Gorilla	CABD030130465:4856-4971	116	111	3e-22	87.07
Gorilla	11:50402993-50403115	123	109	1e-21	86.18
Gorilla	11:50787984-50788102	119	109	1e-21	86.55
Gorilla	11:54103942-54104036	95	109	1e-21	89.47
Gorilla	11:54114519-54114633	116	109	1e-21	87.07
Gorilla	CABD030132002:1910-2032	125	109	1e-21	86.4
Gorilla	CABD030132006:1145-1263	119	109	1e-21	86.55
Gorilla	7:62244506-62244620	116	109	1e-21	87.07
Gorilla	5:56474159-56474290	134	109	1e-21	85.82
Gorilla	11:50436456-50436541	86	107	5e-21	90.7
Gorilla	11:50520209-50520331	124	107	5e-21	86.29
Gorilla	7:62268125-62268222	98	107	5e-21	88.78
Gorilla	CABD030132637:713-810	98	107	5e-21	88.78
Gorilla	CABD030132000:6274-6371	98	107	5e-21	88.78
Gorilla	6:62747468-62747560	93	105	2e-20	89.25
Gorilla	11:54017392-54017512	123	105	2e-20	86.18
Gorilla	CABD030130465:4362-4463	103	105	2e-20	88.35
Gorilla	CABD030132002:1098-1190	93	105	2e-20	89.25
Gorilla	7:62146530-62146646	117	105	2e-20	86.32
Gorilla	7:62309651-62309743	93	105	2e-20	89.25
Gorilla	CABD030131999:1085-1177	93	105	2e-20	89.25
Gorilla	CABD030132640:4829-4925	97	105	2e-20	88.66
Gorilla	17:49241641-49241765	125	105	2e-20	85.6
Gorilla	17:49268692-49268788	98	105	2e-20	88.78
Gorilla	12:50586727-50586812	87	105	2e-20	90.8
Gorilla	11:48982284-48982399	116	103	7e-20	86.21
Gorilla	11:50388736-50388827	92	103	7e-20	89.13
Gorilla	11:50477281-50477372	93	103	7e-20	89.25
Gorilla	11:50523255-50523350	96	103	7e-20	88.54
Gorilla	11:54044273-54044388	116	103	7e-20	86.21
Gorilla	11:54135112-54135207	96	103	7e-20	88.54
Gorilla	X:58870532-58870647	116	103	7e-20	86.21
Gorilla	X:58898330-58898449	120	103	7e-20	85.83
Gorilla	CABD030130465:13478-13573	96	103	7e-20	88.54
Gorilla	6:62948040-62948154	115	101	3e-19	86.09
Gorilla	6:62968246-62968356	111	101	3e-19	86.49
Gorilla	11:48977813-48977935	123	101	3e-19	85.37
Gorilla	11:50357180-50357274	95	101	3e-19	88.42
Gorilla	11:50372106-50372220	116	101	3e-19	86.21
Gorilla	11:50502099-50502185	87	101	3e-19	89.66
Gorilla	7:61798593-61798699	108	101	3e-19	87.04
Gorilla	7:62248414-62248500	87	101	3e-19	89.66
Gorilla	7:62275692-62275802	112	101	3e-19	86.61
Gorilla	7:62277385-62277507	123	101	3e-19	85.37
Gorilla	CABD030132000:7649-7739	91	101	3e-19	89.01
Gorilla	17:49163385-49163507	123	101	3e-19	85.37
Gorilla	17:49203134-49203252	119	101	3e-19	85.71
Gorilla	17:49286991-49287077	87	101	3e-19	89.66
Gorilla	CABD030130466:1698-1808	111	101	3e-19	86.49
Gorilla	19:27192422-27192544	123	101	3e-19	85.37
Gorilla	16:32436941-32437027	87	101	3e-19	89.66
Gorilla	10:77466789-77466911	125	101	3e-19	85.6
Gorilla	10:77470835-77470957	125	101	3e-19	85.6
Gorilla	6:62987612-62987709	98	99.3	1e-18	87.76
Gorilla	11:50463437-50463534	98	99.3	1e-18	87.76
Gorilla	11:54015511-54015632	123	99.3	1e-18	85.37
Gorilla	11:54024337-54024438	102	99.3	1e-18	87.25
Gorilla	11:54148423-54148541	120	99.3	1e-18	85.83
Gorilla	11:54180924-54181021	98	99.3	1e-18	87.76
Gorilla	CABD030130465:7292-7389	98	99.3	1e-18	87.76
Gorilla	CABD030132002:4984-5081	98	99.3	1e-18	87.76
Gorilla	CABD030132002:20854-20951	98	99.3	1e-18	87.76
Gorilla	CABD030132006:21262-21359	98	99.3	1e-18	87.76
Gorilla	7:61790221-61790318	98	99.3	1e-18	87.76
Gorilla	7:62149317-62149402	86	99.3	1e-18	89.53
Gorilla	7:62184513-62184614	102	99.3	1e-18	87.25
Gorilla	7:62249434-62249527	94	99.3	1e-18	88.3
Gorilla	7:62325924-62326021	98	99.3	1e-18	87.76
Gorilla	19:27234049-27234134	86	99.3	1e-18	89.53
Gorilla	16:32432185-32432282	98	99.3	1e-18	87.76
Gorilla	CABD030132001:540-625	86	99.3	1e-18	89.53
Gorilla	CABD030169666:514-627	115	99.3	1e-18	86.09
Gorilla	CABD030131059:671-768	98	99.3	1e-18	87.76
Gorilla	CABD030130463:3662-3775	114	99.3	1e-18	85.96
Gorilla	CABD030132004:2452-2537	86	99.3	1e-18	89.53
Gorilla	6:59722220-59722340	121	97.4	4e-18	85.12
Gorilla	6:59734714-59734806	93	97.4	4e-18	88.17
Gorilla	11:50304996-50305108	113	97.4	4e-18	85.84
Gorilla	11:50334607-50334691	86	97.4	4e-18	89.53
Gorilla	11:50351760-50351852	93	97.4	4e-18	88.17
Gorilla	11:50359414-50359498	85	97.4	4e-18	89.41
Gorilla	11:50386174-50386262	89	97.4	4e-18	88.76
Gorilla	11:50467968-50468056	90	97.4	4e-18	88.89
Gorilla	11:50524928-50525024	97	97.4	4e-18	87.63
Gorilla	11:54026394-54026514	122	97.4	4e-18	85.25
Gorilla	X:58888725-58888821	98	97.4	4e-18	87.76
Gorilla	X:62422705-62422797	93	97.4	4e-18	88.17
Gorilla	7:62076099-62076219	121	97.4	4e-18	85.12
Gorilla	7:62105731-62105827	97	97.4	4e-18	87.63
Gorilla	7:62108137-62108249	113	97.4	4e-18	85.84
Gorilla	7:62213770-62213858	89	97.4	4e-18	88.76
Gorilla	7:62231687-62231779	93	97.4	4e-18	88.17
Gorilla	7:62236356-62236444	89	97.4	4e-18	88.76
Gorilla	7:62269835-62269951	117	97.4	4e-18	85.47
Gorilla	7:62286499-62286591	93	97.4	4e-18	88.17
Gorilla	7:62328142-62328234	93	97.4	4e-18	88.17
Chimpanzee	11:48953918-48954008	91	117	5e-24	91.21
Chimpanzee	11:54201220-54201334	115	117	5e-24	87.83
Chimpanzee	11:54340007-54340108	102	115	2e-23	89.22
Chimpanzee	19:29355078-29355175	98	115	2e-23	89.8
Chimpanzee	AACZ04062069:3600-3712	113	113	8e-23	87.61
Chimpanzee	KV420960:16765-16881	117	113	8e-23	87.18
Chimpanzee	KV420745:383666-383790	125	113	8e-23	86.4
Chimpanzee	7:59549121-59549233	113	113	8e-23	87.61
Chimpanzee	7:59624016-59624128	113	113	8e-23	87.61
Chimpanzee	7:59905041-59905157	117	113	8e-23	87.18
Chimpanzee	11:54248512-54248631	120	111	3e-22	86.67
Chimpanzee	19:29236791-29236911	122	111	3e-22	86.89
Chimpanzee	7:59009001-59009084	84	111	3e-22	91.67
Chimpanzee	7:59511985-59512068	84	111	3e-22	91.67
Chimpanzee	7:59566232-59566343	112	111	3e-22	87.5
Chimpanzee	KV420967:428881-428992	112	111	3e-22	87.5
Chimpanzee	X:58425826-58425945	120	111	3e-22	86.67
Chimpanzee	11:54146414-54146528	115	109	1e-21	86.96
Chimpanzee	11:54327628-54327746	119	109	1e-21	86.55
Chimpanzee	11:54337305-54337420	117	109	1e-21	87.18
Chimpanzee	KV420960:153767-153881	116	109	1e-21	87.07
Chimpanzee	KV420960:203834-203948	115	109	1e-21	86.96
Chimpanzee	KV420745:648961-649083	123	109	1e-21	86.18
Chimpanzee	7:59676942-59677044	103	109	1e-21	88.35
Chimpanzee	7:59677942-59678064	125	109	1e-21	86.4
Chimpanzee	7:59750456-59750570	115	109	1e-21	86.96
Chimpanzee	7:59787364-59787478	116	109	1e-21	87.07
Chimpanzee	KV420967:447738-447860	125	109	1e-21	86.4
Chimpanzee	AACZ04017749:559-681	125	109	1e-21	86.4
Chimpanzee	AACZ04046623:5253-5355	103	109	1e-21	88.35
Chimpanzee	KV420978:121038-121152	116	109	1e-21	87.07
Chimpanzee	10:43854594-43854716	125	109	1e-21	86.4
Chimpanzee	11:48952366-48952463	98	107	5e-21	88.78
Chimpanzee	11:50312168-50312253	86	107	5e-21	90.7
Chimpanzee	11:50339885-50339982	98	107	5e-21	88.78
Chimpanzee	11:54320448-54320569	122	107	5e-21	86.07
Chimpanzee	11:54397307-54397420	114	107	5e-21	86.84
Chimpanzee	KV420960:197848-197937	90	107	5e-21	90
Chimpanzee	KV420960:200784-200873	90	107	5e-21	90
Chimpanzee	7:59753531-59753620	90	107	5e-21	90
Chimpanzee	KV420967:292073-292182	112	107	5e-21	87.5
Chimpanzee	KV420967:320188-320277	90	107	5e-21	90
Chimpanzee	KV420967:371773-371870	98	107	5e-21	88.78
Chimpanzee	X:58401511-58401628	118	107	5e-21	86.44
Chimpanzee	X:58418118-58418240	124	107	5e-21	86.29
Chimpanzee	12:56185563-56185632	70	107	5e-21	94.29
Chimpanzee	6:59556745-59556842	98	107	5e-21	88.78
Chimpanzee	5:68187215-68187348	134	107	5e-21	85.07
Chimpanzee	11:48990746-48990838	93	105	2e-20	89.25
Chimpanzee	11:50230135-50230203	69	105	2e-20	94.2
Chimpanzee	11:50416090-50416178	89	105	2e-20	89.89
Chimpanzee	11:54203612-54203736	125	105	2e-20	85.6
Chimpanzee	11:54251082-54251202	123	105	2e-20	86.18
Chimpanzee	KV420960:236573-236665	93	105	2e-20	89.25
Chimpanzee	KV420745:609033-609153	121	105	2e-20	85.95
Chimpanzee	KV420745:633381-633473	93	105	2e-20	89.25
Chimpanzee	7:59016589-59016677	90	105	2e-20	90
Chimpanzee	7:59519578-59519666	90	105	2e-20	90
Chimpanzee	7:59564690-59564811	123	105	2e-20	86.18
Chimpanzee	7:59717741-59717833	93	105	2e-20	89.25
Chimpanzee	7:166052489-166052609	121	105	2e-20	85.95
Chimpanzee	7:166083118-166083230	113	105	2e-20	86.73
Chimpanzee	7:166128625-166128741	117	105	2e-20	86.32
Chimpanzee	KV420967:81301-81421	121	105	2e-20	85.95
Chimpanzee	KV420967:113513-113625	113	105	2e-20	86.73
Chimpanzee	KV420967:162095-162211	117	105	2e-20	86.32
Chimpanzee	KV420967:281141-281233	93	105	2e-20	89.25
Chimpanzee	KV420967:297409-297505	97	105	2e-20	88.66
Chimpanzee	KV420967:350508-350600	93	105	2e-20	89.25
Chimpanzee	KV420967:430620-430741	123	105	2e-20	86.18
Chimpanzee	12:56095105-56095197	93	105	2e-20	89.25
Chimpanzee	6:59596795-59596915	121	105	2e-20	85.95
Chimpanzee	6:63458447-63458539	93	105	2e-20	89.25
Chimpanzee	KV421328:302864-302956	93	105	2e-20	89.25
Chimpanzee	20:30938577-30938669	93	105	2e-20	89.25
Chimpanzee	11:50191987-50192078	92	103	8e-20	89.13
Chimpanzee	11:50195901-50196016	116	103	8e-20	86.21
Chimpanzee	11:50395711-50395802	92	103	8e-20	89.13
Chimpanzee	11:54335958-54336025	68	103	8e-20	94.12
Chimpanzee	11:54376655-54376770	116	103	8e-20	86.21
Chimpanzee	11:54391085-54391176	92	103	8e-20	89.13
Chimpanzee	19:29277438-29277533	96	103	8e-20	88.54
Chimpanzee	KV420960:174611-174702	92	103	8e-20	89.13
Chimpanzee	KV420960:220433-220556	125	103	8e-20	85.6
Chimpanzee	KV420960:259250-259366	117	103	8e-20	86.32
Chimpanzee	KV420745:654192-654279	88	103	8e-20	89.77
Chimpanzee	7:58994543-58994658	116	103	8e-20	86.21
Chimpanzee	7:59019655-59019770	116	103	8e-20	86.21
Chimpanzee	7:59023067-59023180	116	103	8e-20	86.21
Chimpanzee	7:59027682-59027797	116	103	8e-20	86.21
Chimpanzee	7:59029398-59029513	116	103	8e-20	86.21
Chimpanzee	7:59497527-59497642	116	103	8e-20	86.21
Chimpanzee	7:59522644-59522759	116	103	8e-20	86.21
Chimpanzee	7:59530677-59530792	116	103	8e-20	86.21
Chimpanzee	7:59532393-59532508	116	103	8e-20	86.21
Chimpanzee	7:59650132-59650219	88	103	8e-20	89.77
Chimpanzee	7:59694739-59694855	117	103	8e-20	86.32
Chimpanzee	7:59733850-59733973	125	103	8e-20	85.6
Chimpanzee	7:59768267-59768358	92	103	8e-20	89.13
Chimpanzee	7:166182042-166182157	116	103	8e-20	86.21
Golden_snub-nosed_monkey	JABR01078321:1448-1645	198	217	2e-54	88.89
Golden_snub-nosed_monkey	KN297657:79601-79763	163	211	1e-52	91.41
Golden_snub-nosed_monkey	JABR01039107:320-518	199	204	3e-50	87.94
Golden_snub-nosed_monkey	JABR01016514:11008-11193	186	202	1e-49	88.71
Golden_snub-nosed_monkey	JABR01063964:12387-12583	197	200	5e-49	87.82
Golden_snub-nosed_monkey	KN296279:83607-83767	161	200	5e-49	90.68
Golden_snub-nosed_monkey	KN297657:68412-68623	212	198	2e-48	86.79
Golden_snub-nosed_monkey	KN296279:89219-89382	164	198	2e-48	90.24
Golden_snub-nosed_monkey	KN295889:7574-7737	164	198	2e-48	90.24
Golden_snub-nosed_monkey	JABR01065295:36294-36457	164	198	2e-48	90.24
Golden_snub-nosed_monkey	KN299058:51941-52116	176	198	2e-48	89.2
Golden_snub-nosed_monkey	KN295778:14870-15033	164	198	2e-48	90.24
Golden_snub-nosed_monkey	JABR01059900:8242-8404	163	196	7e-48	90.18
Golden_snub-nosed_monkey	KN298823:36513-36707	195	196	7e-48	87.69
Golden_snub-nosed_monkey	KN297657:76886-77043	158	194	3e-47	90.51
Golden_snub-nosed_monkey	KN299058:51716-51913	198	194	3e-47	87.37
Golden_snub-nosed_monkey	JABR01071092:454-615	162	194	3e-47	90.12
Golden_snub-nosed_monkey	KN296279:64972-65135	164	190	5e-46	89.63
Golden_snub-nosed_monkey	JABR01085361:48937-49100	164	190	5e-46	89.63
Golden_snub-nosed_monkey	KN297220:16747-16910	164	190	5e-46	89.63
Golden_snub-nosed_monkey	KN297059:40300-40463	164	190	5e-46	89.63
Golden_snub-nosed_monkey	JABR01065438:90444-90607	164	190	5e-46	89.63
Golden_snub-nosed_monkey	JABR01065438:103117-103280	164	190	5e-46	89.63
Golden_snub-nosed_monkey	JABR01065438:202336-202499	164	190	5e-46	89.63
Golden_snub-nosed_monkey	JABR01065438:205094-205288	198	188	2e-45	86.87
Golden_snub-nosed_monkey	KN297100:44546-44709	165	188	2e-45	89.7
Golden_snub-nosed_monkey	JABR01016514:30241-30426	186	186	7e-45	87.63
Golden_snub-nosed_monkey	JABR01085361:42220-42417	198	186	7e-45	86.87
Golden_snub-nosed_monkey	KN297220:22548-22745	198	186	7e-45	86.87
Golden_snub-nosed_monkey	JABR01072566:179-364	186	186	7e-45	87.63
Golden_snub-nosed_monkey	JABR01027502:1500-1685	186	186	7e-45	87.63
Golden_snub-nosed_monkey	JABR01027502:2686-2871	186	186	7e-45	87.63
Golden_snub-nosed_monkey	JABR01027502:3872-4057	186	186	7e-45	87.63
Golden_snub-nosed_monkey	JABR01046828:9874-10059	186	186	7e-45	87.63
Golden_snub-nosed_monkey	JABR01046828:13434-13619	186	186	7e-45	87.63
Golden_snub-nosed_monkey	JABR01016514:33804-33989	187	184	3e-44	87.7
Golden_snub-nosed_monkey	KN297100:42330-42490	161	184	3e-44	89.44
Golden_snub-nosed_monkey	KN297253:9850-10059	211	184	3e-44	86.26
Golden_snub-nosed_monkey	JABR01063964:4953-5104	152	182	1e-43	90.13
Golden_snub-nosed_monkey	JABR01063964:8827-8978	152	182	1e-43	90.13
Golden_snub-nosed_monkey	KN298823:41162-41325	164	182	1e-43	89.02
Golden_snub-nosed_monkey	JABR01065438:104694-104849	156	182	1e-43	89.74
Golden_snub-nosed_monkey	KN297100:47444-47607	164	182	1e-43	89.02
Golden_snub-nosed_monkey	KN295781:20685-20860	176	182	1e-43	88.07
Golden_snub-nosed_monkey	KN294807:60776-60951	176	182	1e-43	88.07
Golden_snub-nosed_monkey	KN297021:23296-23459	164	182	1e-43	89.02
Golden_snub-nosed_monkey	KN299478:7235-7410	176	182	1e-43	88.07
Golden_snub-nosed_monkey	KN298376:713465-713628	164	182	1e-43	89.02
Golden_snub-nosed_monkey	KN297657:72880-73110	231	180	4e-43	84.85
Golden_snub-nosed_monkey	KN295889:18318-18516	199	180	4e-43	86.43
Golden_snub-nosed_monkey	KN298823:30403-30605	203	180	4e-43	86.21
Golden_snub-nosed_monkey	KN298823:39272-39434	163	180	4e-43	88.96
Golden_snub-nosed_monkey	JABR01059900:12341-12506	166	178	2e-42	88.55
Golden_snub-nosed_monkey	KN298823:38897-39090	195	178	2e-42	86.67
Golden_snub-nosed_monkey	JABR01065438:104887-105060	174	178	2e-42	87.93
Golden_snub-nosed_monkey	JABR01027502:314-499	186	178	2e-42	87.1
Golden_snub-nosed_monkey	KN297752:27078-27319	243	178	2e-42	84.36
Golden_snub-nosed_monkey	KN297752:30345-30518	174	178	2e-42	87.93
Golden_snub-nosed_monkey	KN296965:71159-71356	198	178	2e-42	86.36
Golden_snub-nosed_monkey	JABR01063964:2631-2815	186	176	7e-42	87.1
Golden_snub-nosed_monkey	JABR01063964:3819-4015	197	176	7e-42	86.29
Golden_snub-nosed_monkey	KN296279:75726-75878	153	176	7e-42	89.54
Golden_snub-nosed_monkey	KN294646:40868-41108	242	176	7e-42	84.3
Golden_snub-nosed_monkey	KN294560:58939-59095	157	176	7e-42	89.17
Golden_snub-nosed_monkey	JABR01045446:12329-12489	161	176	7e-42	88.82
Golden_snub-nosed_monkey	JABR01016514:27299-27450	152	174	3e-41	89.47
Golden_snub-nosed_monkey	JABR01063964:291-442	152	174	3e-41	89.47
Golden_snub-nosed_monkey	JABR01063964:11232-11383	152	174	3e-41	89.47
Golden_snub-nosed_monkey	KN299058:54044-54224	182	174	3e-41	87.36
Golden_snub-nosed_monkey	JABR01085361:51170-51333	164	174	3e-41	88.41
Golden_snub-nosed_monkey	KN297220:19651-19846	196	174	3e-41	86.22
Golden_snub-nosed_monkey	KN295781:17084-17259	176	174	3e-41	87.5
Golden_snub-nosed_monkey	KN298376:925108-925303	197	174	3e-41	86.29
Golden_snub-nosed_monkey	JABR01045446:9965-10128	164	174	3e-41	88.41
Golden_snub-nosed_monkey	JABR01018299:28-191	164	174	3e-41	88.41
Golden_snub-nosed_monkey	JABR01008302:3133-3296	164	174	3e-41	88.41
Golden_snub-nosed_monkey	KN297617:17732-17907	176	174	3e-41	87.5
Golden_snub-nosed_monkey	KN298474:52011-52174	164	174	3e-41	88.41
Golden_snub-nosed_monkey	KN298517:82882-83057	176	174	3e-41	87.5
Golden_snub-nosed_monkey	KN295373:89759-89934	176	174	3e-41	87.5
Golden_snub-nosed_monkey	KN295373:93576-93735	160	174	3e-41	88.75
Golden_snub-nosed_monkey	JABR01059900:6209-6363	155	172	1e-40	89.03
Golden_snub-nosed_monkey	KN298823:39960-40122	163	172	1e-40	88.34
Golden_snub-nosed_monkey	KN298823:40304-40466	163	172	1e-40	88.34
Golden_snub-nosed_monkey	KN294807:65652-65811	161	172	1e-40	88.82
Golden_snub-nosed_monkey	KN297752:33057-33212	157	172	1e-40	89.17
Golden_snub-nosed_monkey	KN296433:23965-24127	163	172	1e-40	88.34
Golden_snub-nosed_monkey	JABR01065295:29167-29332	166	170	4e-40	87.95
Golden_snub-nosed_monkey	KN295781:24340-24538	200	170	4e-40	86
Golden_snub-nosed_monkey	KN298376:710029-710190	162	170	4e-40	88.27
Golden_snub-nosed_monkey	KN298517:82693-82854	162	170	4e-40	88.27
Golden_snub-nosed_monkey	KN298772:3860-4057	198	170	4e-40	85.86
Golden_snub-nosed_monkey	KN297657:75213-75421	209	168	2e-39	85.17
Golden_snub-nosed_monkey	KN296279:4155-4351	198	168	2e-39	85.86
Golden_snub-nosed_monkey	KN299058:55057-55265	209	168	2e-39	85.17
Golden_snub-nosed_monkey	JABR01065438:90242-90414	173	168	2e-39	87.28
Golden_snub-nosed_monkey	JABR01045446:12530-12727	199	168	2e-39	85.93
Golden_snub-nosed_monkey	KN298474:38103-38267	166	168	2e-39	87.95
Golden_snub-nosed_monkey	KN295373:23232-23428	198	168	2e-39	85.86
Golden_snub-nosed_monkey	KN297433:26352-26536	185	168	2e-39	86.49
Black_snub-nosed_monkey	MCGX01059816:313-510	198	233	4e-59	89.9
Black_snub-nosed_monkey	MCGX01010392:5412-5587	177	204	3e-50	89.83
Black_snub-nosed_monkey	MCGX01012504:6225-6421	197	200	5e-49	87.82
Black_snub-nosed_monkey	MCGX01006152:630-793	164	198	2e-48	90.24
Black_snub-nosed_monkey	MCGX01001648:1417-1568	152	198	2e-48	91.45
Black_snub-nosed_monkey	MCGX01004639:13393-13556	164	198	2e-48	90.24
Black_snub-nosed_monkey	MCGX01010099:19667-19830	164	198	2e-48	90.24
Black_snub-nosed_monkey	MCGX01025371:84886-85049	164	198	2e-48	90.24
Black_snub-nosed_monkey	MCGX01041347:353-538	186	194	3e-47	88.17
Black_snub-nosed_monkey	MCGX01029785:1880-2077	198	194	3e-47	87.37
Black_snub-nosed_monkey	MCGX01020591:690-850	161	192	1e-46	90.06
Black_snub-nosed_monkey	MCGX01012225:184-339	156	190	5e-46	90.38
Black_snub-nosed_monkey	MCGX01020258:764-927	164	190	5e-46	89.63
Black_snub-nosed_monkey	MCGX01007037:964-1175	212	190	5e-46	86.32
Black_snub-nosed_monkey	MCGX01034756:1646-1821	176	190	5e-46	88.64
Black_snub-nosed_monkey	MCGX01023885:3214-3377	164	190	5e-46	89.63
Black_snub-nosed_monkey	MCGX01054616:113-275	163	188	2e-45	89.57
Black_snub-nosed_monkey	MCGX01012504:2782-2967	186	186	7e-45	87.63
Black_snub-nosed_monkey	MCGX01001862:722-907	186	186	7e-45	87.63
Black_snub-nosed_monkey	MCGX01039585:312-497	186	186	7e-45	87.63
Black_snub-nosed_monkey	MCGX01010783:2546-2703	158	186	7e-45	89.87
Black_snub-nosed_monkey	MCGX01059875:1358-1543	186	186	7e-45	87.63
Black_snub-nosed_monkey	MCGX01014140:199375-199616	243	186	7e-45	84.77
Black_snub-nosed_monkey	MCGX01021184:1386-1570	186	184	3e-44	87.63
Black_snub-nosed_monkey	MCGX01027278:7341-7526	187	184	3e-44	87.7
Black_snub-nosed_monkey	MCGX01004975:303-498	198	182	1e-43	86.87
Black_snub-nosed_monkey	MCGX01004340:12365-12540	176	182	1e-43	88.07
Black_snub-nosed_monkey	MCGX01011817:1702-1865	164	182	1e-43	89.02
Black_snub-nosed_monkey	MCGX01013016:138918-139113	197	182	1e-43	86.8
Black_snub-nosed_monkey	MCGX01009015:1-179	179	180	4e-43	87.71
Black_snub-nosed_monkey	MCGX01017790:1066-1260	195	180	4e-43	86.67
Black_snub-nosed_monkey	MCGX01009970:1634-1796	164	180	4e-43	89.02
Black_snub-nosed_monkey	MCGX01021856:601-831	231	180	4e-43	84.85
Black_snub-nosed_monkey	MCGX01052464:68-249	182	178	2e-42	87.36
Black_snub-nosed_monkey	MCGX01013885:120-282	165	178	2e-42	89.09
Black_snub-nosed_monkey	MCGX01015931:285-450	166	178	2e-42	88.55
Black_snub-nosed_monkey	MCGX01039535:109-294	186	178	2e-42	87.1
Black_snub-nosed_monkey	MCGX01045198:184-369	186	178	2e-42	87.1
Black_snub-nosed_monkey	MCGX01024877:870-1043	174	178	2e-42	87.93
Black_snub-nosed_monkey	MCGX01038221:1348-1517	170	178	2e-42	88.24
Black_snub-nosed_monkey	MCGX01001050:2200-2358	161	178	2e-42	89.44
Black_snub-nosed_monkey	MCGX01059897:44-228	185	176	7e-42	87.03
Black_snub-nosed_monkey	MCGX01060710:1057-1237	182	176	7e-42	87.36
Black_snub-nosed_monkey	MCGX01005724:712-921	211	176	7e-42	85.78
Black_snub-nosed_monkey	MCGX01012504:5072-5223	152	174	3e-41	89.47
Black_snub-nosed_monkey	MCGX01014857:577-740	164	174	3e-41	88.41
Black_snub-nosed_monkey	MCGX01023819:574-773	203	174	3e-41	86.21
Black_snub-nosed_monkey	MCGX01026537:1486-1661	176	174	3e-41	87.5
Black_snub-nosed_monkey	MCGX01026946:3778-3953	176	174	3e-41	87.5
Black_snub-nosed_monkey	MCGX01024916:18489-18664	176	174	3e-41	87.5
Black_snub-nosed_monkey	MCGX01026801:2950-3105	156	174	3e-41	89.1
Black_snub-nosed_monkey	MCGX01021760:7645-7820	176	174	3e-41	87.5
Black_snub-nosed_monkey	MCGX01003419:142-337	198	174	3e-41	86.36
Black_snub-nosed_monkey	MCGX01026537:5180-5346	167	172	1e-40	88.02
Black_snub-nosed_monkey	MCGX01008624:347-505	160	172	1e-40	88.75
Black_snub-nosed_monkey	MCGX01059868:425-584	161	172	1e-40	88.82
Black_snub-nosed_monkey	MCGX01070329:681-855	176	172	1e-40	87.5
Black_snub-nosed_monkey	MCGX01026168:201-407	208	172	1e-40	85.58
Black_snub-nosed_monkey	MCGX01029102:705-867	163	172	1e-40	88.34
Black_snub-nosed_monkey	MCGX01023860:10890-11052	163	172	1e-40	88.34
Black_snub-nosed_monkey	MCGX01025371:87233-87394	162	170	4e-40	88.27
Black_snub-nosed_monkey	MCGX01014140:205819-206017	200	170	4e-40	86
Black_snub-nosed_monkey	MCGX01026801:2739-2912	174	170	4e-40	87.36
Black_snub-nosed_monkey	MCGX01004825:59-256	198	170	4e-40	85.86
Black_snub-nosed_monkey	MCGX01048418:3-200	198	170	4e-40	85.86
Black_snub-nosed_monkey	MCGX01037729:584-779	198	170	4e-40	85.86
Black_snub-nosed_monkey	MCGX01054945:406-591	186	170	4e-40	86.56
Black_snub-nosed_monkey	MCGX01030373:75-240	166	170	4e-40	87.95
Black_snub-nosed_monkey	MCGX01020453:482-671	190	170	4e-40	86.32
Black_snub-nosed_monkey	MCGX01099158:399-560	164	170	4e-40	88.41
Black_snub-nosed_monkey	MCGX01018543:1465-1627	165	170	4e-40	88.48
Black_snub-nosed_monkey	MCGX01009726:529-686	158	170	4e-40	88.61
Black_snub-nosed_monkey	MCGX01023170:5354-5523	170	170	4e-40	87.65
Black_snub-nosed_monkey	MCGX01013477:41167-41361	196	170	4e-40	86.22
Black_snub-nosed_monkey	MCGX01012504:8966-9146	181	168	2e-39	86.74
Black_snub-nosed_monkey	MCGX01045198:1370-1506	137	168	2e-39	90.51
Black_snub-nosed_monkey	MCGX01023860:8334-8494	162	168	2e-39	88.27
Black_snub-nosed_monkey	MCGX01025958:572-736	165	168	2e-39	87.88
Black_snub-nosed_monkey	MCGX01048264:235-431	198	168	2e-39	85.86
Black_snub-nosed_monkey	MCGX01025371:86389-86560	172	166	6e-39	87.21
Black_snub-nosed_monkey	MCGX01023860:14135-14298	164	166	6e-39	87.8
Black_snub-nosed_monkey	MCGX01036815:195-370	176	166	6e-39	86.93
Black_snub-nosed_monkey	MCGX01070586:342-501	160	166	6e-39	88.12
Black_snub-nosed_monkey	MCGX01046149:208-371	164	166	6e-39	87.8
Black_snub-nosed_monkey	MCGX01009665:107-298	192	166	6e-39	85.94
Black_snub-nosed_monkey	MCGX01016875:121-284	164	166	6e-39	87.8
Black_snub-nosed_monkey	MCGX01051591:7159-7294	136	166	6e-39	90.44
Black_snub-nosed_monkey	MCGX01014140:205628-205791	165	164	3e-38	87.88
Black_snub-nosed_monkey	MCGX01091562:221-371	152	164	3e-38	88.82
Black_snub-nosed_monkey	MCGX01019971:50-204	155	164	3e-38	88.39
Black_snub-nosed_monkey	MCGX01068643:1174-1324	151	164	3e-38	88.74
Black_snub-nosed_monkey	MCGX01020760:1077-1279	203	164	3e-38	85.22
Black_snub-nosed_monkey	MCGX01011817:8181-8378	198	162	1e-37	85.35
Black_snub-nosed_monkey	MCGX01033372:580-745	166	162	1e-37	87.35
Black_snub-nosed_monkey	MCGX01019539:247-456	210	162	1e-37	84.76
Black_snub-nosed_monkey	MCGX01032800:384-569	186	162	1e-37	86.02
Black_snub-nosed_monkey	MCGX01000915:292-477	186	162	1e-37	86.02
Black_snub-nosed_monkey	MCGX01000915:1478-1663	186	162	1e-37	86.02
Black_snub-nosed_monkey	MCGX01001648:2606-2786	181	160	4e-37	86.19
Black_snub-nosed_monkey	MCGX01021856:1149-1357	209	160	4e-37	84.69
Pig-tailed_macaque	KQ006127:10631-10946	316	625	6e-177	100
Pig-tailed_macaque	KQ006730:56255510-56255823	314	605	5e-171	99.36
Pig-tailed_macaque	KQ006127:9948-10260	315	603	2e-170	99.37
Pig-tailed_macaque	KQ006127:11650-11962	316	599	3e-169	99.05
Pig-tailed_macaque	KQ006127:10290-10604	317	597	1e-168	99.05
Pig-tailed_macaque	KQ008997:19763-20078	316	593	2e-167	98.73
Pig-tailed_macaque	KQ006452:29191-29506	316	593	2e-167	98.73
Pig-tailed_macaque	KQ009097:10699-11013	317	589	3e-166	98.74
Pig-tailed_macaque	KQ006127:11311-11622	316	585	5e-165	98.73
Pig-tailed_macaque	KQ006452:48547-48862	316	585	5e-165	98.42
Pig-tailed_macaque	KQ005104:12263-12565	303	583	2e-164	99.34
Pig-tailed_macaque	KQ009097:11041-11353	316	579	3e-163	98.42
Pig-tailed_macaque	KQ006127:10974-11284	316	575	4e-162	98.42
Pig-tailed_macaque	KQ006127:11990-12300	316	575	4e-162	98.42
Pig-tailed_macaque	KQ007999:25103-25415	313	571	7e-161	98.08
Pig-tailed_macaque	KQ006127:6803-7116	316	569	3e-160	97.78
Pig-tailed_macaque	KQ006730:56244157-56244472	316	569	3e-160	97.78
Pig-tailed_macaque	KQ009097:2472-2787	316	569	3e-160	97.78
Pig-tailed_macaque	KQ006127:8157-8466	316	565	4e-159	98.1
Pig-tailed_macaque	KQ005754:9093-9405	313	563	2e-158	97.76
Pig-tailed_macaque	KQ006730:56244500-56244815	316	561	6e-158	97.47
Pig-tailed_macaque	KQ006452:158083-158398	316	561	6e-158	97.47
Pig-tailed_macaque	KQ006127:8494-8805	317	559	3e-157	97.79
Pig-tailed_macaque	KQ006116:744670-744982	318	559	3e-157	97.48
Pig-tailed_macaque	KQ006116:745696-746008	314	555	4e-156	97.45
Pig-tailed_macaque	KQ008472:3096-3408	314	555	4e-156	97.45
Pig-tailed_macaque	KQ006116:832138-832453	316	553	2e-155	97.15
Pig-tailed_macaque	KQ007158:474-789	316	553	2e-155	97.15
Pig-tailed_macaque	KQ008680:20678-20993	316	553	2e-155	97.15
Pig-tailed_macaque	KQ007019:59692-60007	316	553	2e-155	97.15
Pig-tailed_macaque	KQ006730:56255854-56256168	315	551	6e-155	97.14
Pig-tailed_macaque	KQ006452:50105-50419	316	551	6e-155	97.15
Pig-tailed_macaque	KQ005754:8751-9065	316	551	6e-155	97.15
Pig-tailed_macaque	KQ008472:2266-2572	308	551	6e-155	97.73
Pig-tailed_macaque	KQ009097:10362-10671	316	549	2e-154	97.47
Pig-tailed_macaque	KQ006127:8833-9141	316	548	9e-154	97.47
Pig-tailed_macaque	KQ006127:6117-6432	316	546	4e-153	96.84
Pig-tailed_macaque	KQ006116:745353-745668	316	546	4e-153	96.84
Pig-tailed_macaque	KQ006452:29524-29818	295	544	1e-152	98.31
Pig-tailed_macaque	KQ004731:54130-54424	295	544	1e-152	98.31
Pig-tailed_macaque	KQ006127:6462-6775	314	542	6e-152	96.82
Pig-tailed_macaque	KQ006452:157740-158055	316	538	9e-151	96.52
Pig-tailed_macaque	KQ006116:742198-742522	325	538	9e-151	95.38
Pig-tailed_macaque	KQ006127:7487-7797	316	536	3e-150	96.84
Pig-tailed_macaque	KQ006116:45677-45983	308	536	3e-150	97.08
Pig-tailed_macaque	KQ004832:211-509	299	536	3e-150	97.66
Pig-tailed_macaque	KQ006127:7144-7459	316	530	2e-148	96.2
Pig-tailed_macaque	KQ005754:8408-8723	316	530	2e-148	96.2
Pig-tailed_macaque	KQ006452:152343-152641	299	528	8e-148	97.32
Pig-tailed_macaque	KQ006116:743255-743569	316	528	8e-148	96.2
Pig-tailed_macaque	JZLF01085850:481-786	306	526	3e-147	96.73
Pig-tailed_macaque	KQ006974:483-791	309	524	1e-146	96.44
Pig-tailed_macaque	KQ006730:56243642-56243957	316	522	5e-146	95.89
Pig-tailed_macaque	KQ006116:746038-746353	316	522	5e-146	95.89
Pig-tailed_macaque	KQ004731:54970-55285	316	522	5e-146	95.89
Pig-tailed_macaque	KQ004731:65294-65609	316	522	5e-146	95.89
Pig-tailed_macaque	KQ009094:9396874-9397145	272	522	5e-146	99.26
Pig-tailed_macaque	KQ006127:7825-8129	316	520	2e-145	96.52
Pig-tailed_macaque	KQ009097:2166-2444	280	520	2e-145	98.57
Pig-tailed_macaque	KQ006116:742549-742863	316	520	2e-145	95.89
Pig-tailed_macaque	KQ009097:9692-10004	320	516	3e-144	96.25
Pig-tailed_macaque	KQ006116:747227-747542	316	514	1e-143	95.57
Pig-tailed_macaque	KQ005032:333-647	322	508	7e-142	95.96
Pig-tailed_macaque	KQ005039:52735-53050	316	506	3e-141	95.25
Pig-tailed_macaque	KQ006116:743976-744299	325	504	1e-140	94.15
Pig-tailed_macaque	KQ007096:2643-2937	295	504	1e-140	96.61
Pig-tailed_macaque	KQ006030:14374720-14375034	316	504	1e-140	95.25
Pig-tailed_macaque	KQ009097:11381-11690	318	502	5e-140	95.6
Pig-tailed_macaque	KQ007524:19409-19701	293	500	2e-139	96.59
Pig-tailed_macaque	KQ006452:27979-28305	327	498	7e-139	93.58
Pig-tailed_macaque	KQ004832:5146-5401	256	498	7e-139	99.61
Pig-tailed_macaque	KQ006730:56229311-56229573	263	496	3e-138	98.86
Pig-tailed_macaque	KQ007290:1849-2163	316	496	3e-138	94.94
Pig-tailed_macaque	KQ005890:1864477-1864731	255	496	3e-138	99.61
Pig-tailed_macaque	KQ008997:20535-20840	310	494	1e-137	95.16
Pig-tailed_macaque	KQ007019:58262-58519	258	494	1e-137	99.22
Pig-tailed_macaque	KQ006116:9844-10159	316	490	2e-136	94.62
Pig-tailed_macaque	KQ006116:744327-744642	316	490	2e-136	94.62
Pig-tailed_macaque	KQ008997:3568-3866	299	488	7e-136	95.65
Pig-tailed_macaque	KQ006452:86197-86518	322	488	7e-136	93.79
Pig-tailed_macaque	KQ006452:93200-93521	322	488	7e-136	93.79
Pig-tailed_macaque	KQ006116:831796-832110	316	488	7e-136	94.62
Pig-tailed_macaque	KQ008472:3652-3914	263	488	7e-136	98.48
Pig-tailed_macaque	KQ007019:59349-59664	317	488	7e-136	94.64
Pig-tailed_macaque	KQ008539:1556-1826	271	488	7e-136	97.79
Pig-tailed_macaque	KQ007377:79206-79503	298	486	3e-135	95.64
Pig-tailed_macaque	KQ008472:2786-3066	281	484	1e-134	96.8
Pig-tailed_macaque	KQ008539:3154-3422	269	484	1e-134	97.77
Pig-tailed_macaque	KQ006452:200755-201070	316	482	4e-134	94.3
Pig-tailed_macaque	KQ006116:746712-747027	316	482	4e-134	94.3
Pig-tailed_macaque	KQ005019:1828-2107	280	482	4e-134	96.79
Pig-tailed_macaque	KQ006127:9609-9920	319	480	2e-133	94.36
Pig-tailed_macaque	KQ005019:2453-2721	269	480	2e-133	97.4
Pig-tailed_macaque	KQ005019:3540-3838	299	480	2e-133	95.32
Pig-tailed_macaque	JZLF01085850:132-443	316	478	6e-133	94.3
Pig-tailed_macaque	KQ009094:9396336-9396585	250	478	6e-133	99.2
Pig-tailed_macaque	KQ006452:41084-41399	316	474	1e-131	93.99
Pig-tailed_macaque	KQ006452:48981-49296	316	474	1e-131	93.99
Pig-tailed_macaque	KQ006116:38060-38355	296	474	1e-131	94.59
Pig-tailed_macaque	KQ006116:745010-745325	316	474	1e-131	93.99
Angola_colobus	KN982988:1098427-1098726	302	233	4e-59	84.77
Angola_colobus	KN983107:89697-89859	163	219	6e-55	92.02
Angola_colobus	KN983553:232360-232513	154	210	5e-52	92.21
Angola_colobus	JYKR01192764:449-660	212	206	8e-51	87.26
Angola_colobus	KN985795:20002-20157	156	206	8e-51	91.67
Angola_colobus	KN984151:417826-418050	226	204	3e-50	86.73
Angola_colobus	KN983553:487881-488070	192	202	1e-49	88.54
Angola_colobus	KN982988:1080638-1080801	164	198	2e-48	90.24
Angola_colobus	KN983107:437263-437422	160	198	2e-48	90.62
Angola_colobus	KN982988:1088219-1088417	199	196	8e-48	87.44
Angola_colobus	KN982988:1090182-1090344	163	196	8e-48	90.18
Angola_colobus	KN984151:452501-452664	165	196	8e-48	90.3
Angola_colobus	KN983584:188555-188749	195	196	8e-48	87.69
Angola_colobus	KN983311:197522-197716	195	196	8e-48	87.69
Angola_colobus	KN983501:668795-668958	165	196	8e-48	90.3
Angola_colobus	KN983027:1009809-1009972	165	196	8e-48	90.3
Angola_colobus	KN983107:442884-443081	198	194	3e-47	87.37
Angola_colobus	KN985756:47989-48186	198	194	3e-47	87.37
Angola_colobus	KN985756:48732-48929	198	194	3e-47	87.37
Angola_colobus	KN985698:67155-67352	198	194	3e-47	87.37
Angola_colobus	KN985826:83041-83235	196	194	3e-47	87.76
Angola_colobus	KN985826:85766-85963	198	194	3e-47	87.37
Angola_colobus	KN980440:259609-259766	158	194	3e-47	90.51
Angola_colobus	KN980440:817415-817603	189	192	1e-46	87.83
Angola_colobus	KN979907:48662-48858	198	192	1e-46	87.37
Angola_colobus	KN983107:18200-18363	164	190	5e-46	89.63
Angola_colobus	KN979907:48886-49061	176	190	5e-46	88.64
Angola_colobus	KN979464:5267-5430	164	190	5e-46	89.63
Angola_colobus	KN981969:1502180-1502343	164	190	5e-46	89.63
Angola_colobus	KN983501:685749-685912	165	188	2e-45	89.7
Angola_colobus	KN980440:349411-349573	163	188	2e-45	89.57
Angola_colobus	KN981969:1191572-1191886	315	188	2e-45	82.54
Angola_colobus	KN985318:48649-48812	165	188	2e-45	89.7
Angola_colobus	KN982047:370206-370400	195	188	2e-45	87.18
Angola_colobus	KN983553:490943-491104	162	186	7e-45	89.51
Angola_colobus	KN983553:551851-552048	198	186	7e-45	86.87
Angola_colobus	KN985839:89591-89792	203	186	7e-45	86.7
Angola_colobus	KN984884:79944-80141	198	186	7e-45	86.87
Angola_colobus	KN983742:287634-287831	198	186	7e-45	86.87
Angola_colobus	KN983107:369363-369523	161	184	3e-44	89.44
Angola_colobus	KN983742:292391-292587	198	184	3e-44	86.87
Angola_colobus	KN983107:631748-631911	164	182	1e-43	89.02
Angola_colobus	KN983553:447021-447180	160	182	1e-43	89.38
Angola_colobus	KN980440:629547-629710	164	182	1e-43	89.02
Angola_colobus	KN982586:12408-12569	163	182	1e-43	89.57
Angola_colobus	KN982024:475944-476139	197	182	1e-43	86.8
Angola_colobus	KN983457:11259-11422	164	182	1e-43	89.02
Angola_colobus	KN983321:860483-860646	164	182	1e-43	89.02
Angola_colobus	KN979474:1730580-1730743	164	182	1e-43	89.02
Angola_colobus	KN982988:1095361-1095536	177	180	4e-43	88.14
Angola_colobus	KN983107:440330-440492	164	180	4e-43	89.02
Angola_colobus	KN983501:479512-479667	157	180	4e-43	89.81
Angola_colobus	KN985318:86371-86525	155	180	4e-43	89.68
Angola_colobus	KN984560:152017-152180	165	180	4e-43	89.09
Angola_colobus	KN984507:335607-335769	164	180	4e-43	89.02
Angola_colobus	KN983719:948878-949064	188	180	4e-43	87.23
Angola_colobus	KN982988:1016262-1016459	198	178	2e-42	86.36
Angola_colobus	KN983553:105631-105792	162	178	2e-42	88.89
Angola_colobus	KN985795:4859-5020	162	178	2e-42	88.89
Angola_colobus	KN985795:11010-11171	162	178	2e-42	88.89
Angola_colobus	KN983501:156535-156732	198	178	2e-42	86.36
Angola_colobus	KN981969:1197339-1197541	204	178	2e-42	86.27
Angola_colobus	KN981969:1499228-1499421	195	178	2e-42	86.67
Angola_colobus	KN984705:119385-119582	198	178	2e-42	86.36
Angola_colobus	KN984404:433005-433168	166	178	2e-42	89.16
Angola_colobus	KN984151:247150-247316	167	176	7e-42	88.02
Angola_colobus	KN984151:411972-412132	161	176	7e-42	88.82
Angola_colobus	KN983027:1007252-1007413	163	176	7e-42	88.96
Angola_colobus	KN980440:262373-262533	161	176	7e-42	88.82
Angola_colobus	KN985763:98031-98228	199	176	7e-42	86.43
Angola_colobus	KN982763:347271-347467	197	176	7e-42	86.29
Angola_colobus	KN983868:383405-383603	200	176	7e-42	86.5
Angola_colobus	KN983868:387895-388059	165	176	7e-42	88.48
Angola_colobus	KN980185:219469-219678	211	176	7e-42	85.78
Angola_colobus	KN983027:802880-803043	164	174	3e-41	88.41
Angola_colobus	KN980440:87445-87576	132	174	3e-41	91.67
Angola_colobus	KN984507:82315-82490	176	174	3e-41	87.5
Angola_colobus	KN983719:626764-626927	164	174	3e-41	88.41
Angola_colobus	KN984321:310707-310870	164	174	3e-41	88.41
Angola_colobus	KN982988:1086187-1086362	177	172	1e-40	87.57
Angola_colobus	KN982988:1086390-1086553	165	172	1e-40	88.48
Angola_colobus	KN983107:534309-534472	165	172	1e-40	88.48
Angola_colobus	KN983553:444464-444622	160	172	1e-40	88.75
Angola_colobus	KN981969:1487900-1488102	203	172	1e-40	85.71
Angola_colobus	KN985318:84331-84493	163	172	1e-40	88.34
Angola_colobus	KN983457:27003-27165	163	172	1e-40	88.34
Angola_colobus	KN983321:851642-851808	167	172	1e-40	88.02
Angola_colobus	KN984404:122782-122976	195	172	1e-40	86.15
Angola_colobus	KN983805:2015-2178	165	172	1e-40	88.48
Angola_colobus	KN982134:706341-706504	165	172	1e-40	88.48
Angola_colobus	KN982988:1076888-1077085	198	170	4e-40	85.86
Angola_colobus	KN982988:1095565-1095722	158	170	4e-40	88.61
Angola_colobus	KN983553:575232-575393	163	170	4e-40	88.34
Angola_colobus	KN984151:419384-419581	200	170	4e-40	86
Angola_colobus	KN983311:205959-206136	179	170	4e-40	87.15
Angola_colobus	KN983027:1017284-1017434	152	170	4e-40	89.47
Angola_colobus	KN982047:48382-48543	162	170	4e-40	88.27
Angola_colobus	KN979474:1744524-1744721	198	170	4e-40	85.86
Angola_colobus	KN983027:721628-721794	167	168	2e-39	87.43
Angola_colobus	KN985318:37791-37943	153	168	2e-39	88.89
