# Supplementary material for: Population Scale Analysis of Centromeric Satellite DNA Reveals Highly Dynamic Evolutionary Patterns and Genomic Organization in Long-Tailed and Rhesus Macaques
Source: Cells. 2022 Jun 17;11(12):1953. doi: 10.3390/cells11121953 (PMC9221937; doi:10.3390/cells11121953)
Supplement: Supplementary file 1 [file cells-11-01953-s001.zip › Supplementary Dataset S3.xlsx]

## Sheet: data_set
Supplementary dataset S3.			Comparison of Ho and He between 18 populations.
pop	Ho	He	se1	se2	n1	n2
BPN	0.149	0.088	0.028	0.016	40	40
BSS	0.198	0.136	0.031	0.018	17	17
KN	0.139	0.089	0.025	0.015	20	20
KNG	0.133	0.081	0.026	0.015	20	20
KNKTK	0.213	0.115	0.034	0.018	6	6
KSP	0.19	0.125	0.027	0.016	20	20
MFRC	0.172	0.09	0.033	0.017	18	18
SSD	0.217	0.121	0.034	0.018	14	14
SY	0.137	0.083	0.027	0.015	19	19
WHM	0.138	0.102	0.027	0.016	21	21
WKH	0.139	0.088	0.026	0.015	20	20
WKT	0.197	0.121	0.031	0.017	40	40
WPN	0.14	0.078	0.03	0.016	20	20
WPT	0.216	0.146	0.032	0.018	21	21
WSK	0.228	0.128	0.034	0.018	10	10
WTM	0.16	0.088	0.031	0.016	33	33
WTPMH	0.382	0.241	0.035	0.018	20	20
WTT	0.323	0.214	0.03	0.017	19	19

## Sheet: Ho_vs_He
pop	df	se	t	p-value	SIG.
BPN	0.061	0.032249	1.89153	0.0632258	ns
BSS	0.062	0.0358469	1.72958	0.0957066	ns
KN	0.05	0.0291548	1.71499	0.0962941	ns
KNG	0.052	0.0300167	1.73237	0.0933481	ns
KNKTK	0.098	0.0384708	2.54739	0.0357568	sig
KSP	0.065	0.0313847	2.07107	0.046798	sig
MFRC	0.082	0.0371214	2.20897	0.0364018	sig
SSD	0.096	0.0384708	2.4954	0.0215619	sig
SY	0.054	0.0308869	1.74832	0.0913115	ns
WHM	0.036	0.0313847	1.14705	0.259732	ns
WKH	0.051	0.0300167	1.69906	0.0995262	ns
WKT	0.076	0.0353553	2.14961	0.0355939	sig
WPN	0.062	0.034	1.82353	0.0785462	ns
WPT	0.07	0.0367151	1.90657	0.0657323	ns
WSK	0.1	0.0384708	2.59938	0.0213166	sig
WTM	0.072	0.0348855	2.06389	0.0444655	sig
WTPMH	0.141	0.0393573	3.58256	0.00125288	sig
WTT	0.109	0.0344819	3.16108	0.00371161	sig

## Sheet: Ho_vs_Ho
pop1	pop2	df	se	t	p-value	SIG.
BPN	BSS	-0.049	0.0417732	-1.173	0.247494	ns
BPN	KN	0.01	0.0375366	0.266406	0.790929	ns
BPN	KNG	0.016	0.0382099	0.418739	0.677082	ns
BPN	KNKTK	-0.064	0.0440454	-1.45304	0.1694	ns
BPN	KSP	-0.041	0.0388973	-1.05406	0.296698	ns
BPN	MFRC	-0.023	0.0432782	-0.531446	0.597976	ns
BPN	SSD	-0.068	0.0440454	-1.54386	0.132533	ns
BPN	SY	0.012	0.0388973	0.308505	0.758966	ns
BPN	WHM	0.011	0.0388973	0.282796	0.778413	ns
BPN	WKH	0.01	0.0382099	0.261712	0.794548	ns
BPN	WKT	-0.048	0.0417732	-1.14906	0.254078	ns
BPN	WPN	0.009	0.0410366	0.219317	0.827323	ns
BPN	WPT	-0.067	0.0425206	-1.57571	0.12167	ns
BPN	WSK	-0.079	0.0440454	-1.7936	0.0860855	ns
BPN	WTM	-0.011	0.0417732	-0.263327	0.793092	ns
BPN	WTPMH	-0.233	0.0448219	-5.19836	5.39183e-06	sig
BPN	WTT	-0.174	0.0410366	-4.24012	0.000104665	sig
BSS	KN	0.059	0.0398246	1.4815	0.148215	ns
BSS	KNG	0.065	0.0404599	1.60653	0.117751	ns
BSS	KNKTK	-0.015	0.0460109	-0.32601	0.749311	ns
BSS	KSP	0.008	0.0411096	0.194602	0.846886	ns
BSS	MFRC	0.026	0.0452769	0.574244	0.569701	ns
BSS	SSD	-0.019	0.0460109	-0.412946	0.6828	ns
BSS	SY	0.061	0.0411096	1.48384	0.147417	ns
BSS	WHM	0.06	0.0411096	1.45951	0.153634	ns
BSS	WKH	0.059	0.0404599	1.45824	0.154294	ns
BSS	WKT	0.001	0.0438406	0.0228099	0.981902	ns
BSS	WPN	0.058	0.0431393	1.34448	0.187564	ns
BSS	WPT	-0.018	0.0445533	-0.40401	0.688611	ns
BSS	WSK	-0.03	0.0460109	-0.65202	0.521225	ns
BSS	WTM	0.038	0.0438406	0.866776	0.390913	ns
BSS	WTPMH	-0.184	0.0467547	-3.93544	0.000376716	sig
BSS	WTT	-0.125	0.0431393	-2.89759	0.00656301	sig
KN	KNG	0.006	0.0360694	0.166346	0.868768	ns
KN	KNKTK	-0.074	0.0422019	-1.75348	0.107252	ns
KN	KSP	-0.051	0.0367967	-1.38599	0.173877	ns
KN	MFRC	-0.033	0.0414005	-0.797092	0.431178	ns
KN	SSD	-0.078	0.0422019	-1.84826	0.0760977	ns
KN	SY	0.002	0.0367967	0.0543526	0.95695	ns
KN	WHM	0.001	0.0367967	0.0271763	0.978458	ns
KN	WKH	0	0.0360694	0	1	ns
KN	WKT	-0.058	0.0398246	-1.45639	0.150786	ns
KN	WPN	-0.001	0.0390513	-0.0256074	0.979709	ns
KN	WPT	-0.077	0.0406079	-1.89618	0.0657114	ns
KN	WSK	-0.089	0.0422019	-2.10891	0.0486253	sig
KN	WTM	-0.021	0.0398246	-0.527312	0.600268	ns
KN	WTPMH	-0.243	0.0430116	-5.64963	2.36931e-06	sig
KN	WTT	-0.184	0.0390513	-4.71176	3.71933e-05	sig
KNG	KNKTK	-0.08	0.0428019	-1.86908	0.087233	ns
KNG	KSP	-0.057	0.0374833	-1.52068	0.136631	ns
KNG	MFRC	-0.039	0.0420119	-0.928308	0.359947	ns
KNG	SSD	-0.084	0.0428019	-1.96253	0.0602962	ns
KNG	SY	-0.004	0.0374833	-0.106714	0.915595	ns
KNG	WHM	-0.005	0.0374833	-0.133393	0.894569	ns
KNG	WKH	-0.006	0.0367695	-0.163179	0.871243	ns
KNG	WKT	-0.064	0.0404599	-1.58181	0.11931	ns
KNG	WPN	-0.007	0.0396989	-0.176327	0.860992	ns
KNG	WPT	-0.083	0.0412311	-2.01305	0.0512744	ns
KNG	WSK	-0.095	0.0428019	-2.21953	0.0385198	sig
KNG	WTM	-0.027	0.0404599	-0.667328	0.507592	ns
KNG	WTPMH	-0.249	0.0436005	-5.71095	1.84357e-06	sig
KNG	WTT	-0.19	0.0396989	-4.78603	2.88875e-05	sig
KNKTK	KSP	0.023	0.0434166	0.529752	0.605919	ns
KNKTK	MFRC	0.041	0.0473814	0.865318	0.400533	ns
KNKTK	SSD	-0.004	0.0480833	-0.083189	0.934843	ns
KNKTK	SY	0.076	0.0434166	1.75048	0.105593	ns
KNKTK	WHM	0.075	0.0434166	1.72745	0.109516	ns
KNKTK	WKH	0.074	0.0428019	1.7289	0.110501	ns
KNKTK	WKT	0.016	0.0460109	0.347744	0.732739	ns
KNKTK	WPN	0.073	0.0453431	1.60995	0.1303	ns
KNKTK	WPT	-0.003	0.0466905	-0.0642529	0.949625	ns
KNKTK	WSK	-0.015	0.0480833	-0.311959	0.760073	ns
KNKTK	WTM	0.053	0.0460109	1.1519	0.267234	ns
KNKTK	WTPMH	-0.169	0.0487955	-3.46344	0.00311081	sig
KNKTK	WTT	-0.11	0.0453431	-2.42595	0.0298991	sig
KSP	MFRC	0.018	0.042638	0.422158	0.675581	ns
KSP	SSD	-0.027	0.0434166	-0.621882	0.539203	ns
KSP	SY	0.053	0.0381838	1.38802	0.173438	ns
KSP	WHM	0.052	0.0381838	1.36183	0.18107	ns
KSP	WKH	0.051	0.0374833	1.36061	0.181666	ns
KSP	WKT	-0.007	0.0411096	-0.170276	0.865414	ns
KSP	WPN	0.05	0.0403609	1.23882	0.223092	ns
KSP	WPT	-0.026	0.0418688	-0.620987	0.538294	ns
KSP	WSK	-0.038	0.0434166	-0.875242	0.391763	ns
KSP	WTM	0.03	0.0411096	0.729756	0.468927	ns
KSP	WTPMH	-0.192	0.0442041	-4.34349	0.000110816	sig
KSP	WTT	-0.133	0.0403609	-3.29527	0.00219965	sig
MFRC	SSD	-0.045	0.0473814	-0.949739	0.350038	ns
MFRC	SY	0.035	0.042638	0.820864	0.417564	ns
MFRC	WHM	0.034	0.042638	0.797411	0.430697	ns
MFRC	WKH	0.033	0.0420119	0.785492	0.437734	ns
MFRC	WKT	-0.025	0.0452769	-0.552158	0.583574	ns
MFRC	WPN	0.032	0.0445982	0.717518	0.47779	ns
MFRC	WPT	-0.044	0.0459674	-0.957201	0.344757	ns
MFRC	WSK	-0.056	0.0473814	-1.1819	0.249274	ns
MFRC	WTM	0.012	0.0452769	0.265036	0.79226	ns
MFRC	WTPMH	-0.21	0.0481041	-4.36554	0.000102411	sig
MFRC	WTT	-0.151	0.0445982	-3.38579	0.00178582	sig
SSD	SY	0.08	0.0434166	1.84261	0.0764526	ns
SSD	WHM	0.079	0.0434166	1.81958	0.0797399	ns
SSD	WKH	0.078	0.0428019	1.82235	0.0797237	ns
SSD	WKT	0.02	0.0460109	0.43468	0.666431	ns
SSD	WPN	0.077	0.0453431	1.69816	0.100159	ns
SSD	WPT	0.001	0.0466905	0.0214176	0.983051	ns
SSD	WSK	-0.011	0.0480833	-0.22877	0.821233	ns
SSD	WTM	0.057	0.0460109	1.23884	0.22388	ns
SSD	WTPMH	-0.165	0.0487955	-3.38146	0.00195585	sig
SSD	WTT	-0.106	0.0453431	-2.33773	0.0266133	sig
SY	WHM	-0.001	0.0381838	-0.0261891	0.979244	ns
SY	WKH	-0.002	0.0374833	-0.0533571	0.957736	ns
SY	WKT	-0.06	0.0411096	-1.45951	0.150252	ns
SY	WPN	-0.003	0.0403609	-0.0743294	0.941151	ns
SY	WPT	-0.079	0.0418688	-1.88685	0.0669419	ns
SY	WSK	-0.091	0.0434166	-2.09597	0.0490363	sig
SY	WTM	-0.023	0.0411096	-0.55948	0.578387	ns
SY	WTPMH	-0.245	0.0442041	-5.54248	3.04692e-06	sig
SY	WTT	-0.186	0.0403609	-4.60842	5.03971e-05	sig
WHM	WKH	-0.001	0.0374833	-0.0266785	0.978852	ns
WHM	WKT	-0.059	0.0411096	-1.43519	0.156714	ns
WHM	WPN	-0.002	0.0403609	-0.0495529	0.960736	ns
WHM	WPT	-0.078	0.0418688	-1.86296	0.0700317	ns
WHM	WSK	-0.09	0.0434166	-2.07294	0.051117	ns
WHM	WTM	-0.022	0.0411096	-0.535155	0.594845	ns
WHM	WTPMH	-0.244	0.0442041	-5.51985	3.00329e-06	sig
WHM	WTT	-0.185	0.0403609	-4.58365	5.04583e-05	sig
WKH	WKT	-0.058	0.0404599	-1.43352	0.157255	ns
WKH	WPN	-0.001	0.0396989	-0.0251896	0.980038	ns
WKH	WPT	-0.077	0.0412311	-1.86752	0.0695994	ns
WKH	WSK	-0.089	0.0428019	-2.07935	0.0510407	ns
WKH	WTM	-0.021	0.0404599	-0.519033	0.605998	ns
WKH	WTPMH	-0.243	0.0436005	-5.57334	2.80169e-06	sig
WKH	WTT	-0.184	0.0396989	-4.63489	4.5661e-05	sig
WKT	WPN	0.057	0.0431393	1.3213	0.192161	ns
WKT	WPT	-0.019	0.0445533	-0.426455	0.671544	ns
WKT	WSK	-0.031	0.0460109	-0.673754	0.506407	ns
WKT	WTM	0.037	0.0438406	0.843966	0.401551	ns
WKT	WTPMH	-0.185	0.0467547	-3.95682	0.00025766	sig
WKT	WTT	-0.126	0.0431393	-2.92077	0.00521065	sig
WPN	WPT	-0.076	0.0438634	-1.73265	0.091072	ns
WPN	WSK	-0.088	0.0453431	-1.94076	0.0651387	ns
WPN	WTM	-0.02	0.0431393	-0.463614	0.645	ns
WPN	WTPMH	-0.242	0.0460977	-5.24972	6.44624e-06	sig
WPN	WTT	-0.183	0.0424264	-4.31335	0.000114895	sig
WPT	WSK	-0.012	0.0466905	-0.257012	0.799392	ns
WPT	WTM	0.056	0.0445533	1.25692	0.214806	ns
WPT	WTPMH	-0.166	0.0474236	-3.50036	0.00119164	sig
WPT	WTT	-0.107	0.0438634	-2.43939	0.019492	sig
WSK	WTM	0.068	0.0460109	1.47791	0.151787	ns
WSK	WTPMH	-0.154	0.0487955	-3.15603	0.00414761	sig
WSK	WTT	-0.095	0.0453431	-2.09513	0.047973	sig
WTM	WTPMH	-0.222	0.0467547	-4.74819	2.17648e-05	sig
WTM	WTT	-0.163	0.0431393	-3.77846	0.000444762	sig
WTPMH	WTT	0.059	0.0460977	1.27989	0.208676	ns

## Sheet: He_vs_He
pop1	pop2	df	se	t	p-value	SIG.
BPN	BSS	-0.048	0.0240832	-1.99309	0.0529651	ns
BPN	KN	-0.001	0.0219317	-0.0455961	0.963803	ns
BPN	KNG	0.007	0.0219317	0.319173	0.750844	ns
BPN	KNKTK	-0.027	0.0240832	-1.12111	0.28006	ns
BPN	KSP	-0.037	0.0226274	-1.63518	0.108156	ns
BPN	MFRC	-0.002	0.0233452	-0.0856706	0.932108	ns
BPN	SSD	-0.033	0.0240832	-1.37025	0.179464	ns
BPN	SY	0.005	0.0219317	0.22798	0.820564	ns
BPN	WHM	-0.014	0.0226274	-0.618718	0.538758	ns
BPN	WKH	0	0.0219317	0	1	ns
BPN	WKT	-0.033	0.0233452	-1.41356	0.161483	ns
BPN	WPN	0.01	0.0226274	0.441942	0.660396	ns
BPN	WPT	-0.058	0.0240832	-2.40832	0.0198701	sig
BPN	WSK	-0.04	0.0240832	-1.66091	0.10912	ns
BPN	WTM	0	0.0226274	0	1	ns
BPN	WTPMH	-0.153	0.0240832	-6.35298	8.05987e-08	sig
BPN	WTT	-0.126	0.0233452	-5.39725	2.17124e-06	sig
BSS	KN	0.047	0.0234308	2.00591	0.0532048	ns
BSS	KNG	0.055	0.0234308	2.34734	0.0251216	sig
BSS	KNKTK	0.021	0.0254558	0.824958	0.422122	ns
BSS	KSP	0.011	0.0240832	0.45675	0.650789	ns
BSS	MFRC	0.046	0.0247588	1.85792	0.0721899	ns
BSS	SSD	0.015	0.0254558	0.589256	0.560302	ns
BSS	SY	0.053	0.0234308	2.26199	0.0305912	sig
BSS	WHM	0.034	0.0240832	1.41177	0.167052	ns
BSS	WKH	0.048	0.0234308	2.04859	0.0486065	sig
BSS	WKT	0.015	0.0247588	0.605844	0.54779	ns
BSS	WPN	0.058	0.0240832	2.40832	0.021664	sig
BSS	WPT	-0.01	0.0254558	-0.392837	0.696785	ns
BSS	WSK	0.008	0.0254558	0.31427	0.756144	ns
BSS	WTM	0.048	0.0240832	1.99309	0.0532674	ns
BSS	WTPMH	-0.105	0.0254558	-4.12479	0.000219468	sig
BSS	WTT	-0.078	0.0247588	-3.15039	0.00342021	sig
KN	KNG	0.008	0.0212132	0.377124	0.70818	ns
KN	KNKTK	-0.026	0.0234308	-1.10965	0.287657	ns
KN	KSP	-0.036	0.0219317	-1.64146	0.108989	ns
KN	MFRC	-0.001	0.0226716	-0.0441081	0.96507	ns
KN	SSD	-0.032	0.0234308	-1.36573	0.182871	ns
KN	SY	0.006	0.0212132	0.282843	0.778875	ns
KN	WHM	-0.013	0.0219317	-0.592749	0.556776	ns
KN	WKH	0.001	0.0212132	0.0471405	0.962648	ns
KN	WKT	-0.032	0.0226716	-1.41146	0.163744	ns
KN	WPN	0.011	0.0219317	0.501557	0.618885	ns
KN	WPT	-0.057	0.0234308	-2.4327	0.0197927	sig
KN	WSK	-0.039	0.0234308	-1.66448	0.110843	ns
KN	WTM	0.001	0.0219317	0.0455961	0.963817	ns
KN	WTPMH	-0.152	0.0234308	-6.4872	1.41268e-07	sig
KN	WTT	-0.125	0.0226716	-5.51351	3.06359e-06	sig
KNG	KNKTK	-0.034	0.0234308	-1.45108	0.170933	ns
KNG	KSP	-0.044	0.0219317	-2.00623	0.052018	ns
KNG	MFRC	-0.009	0.0226716	-0.396973	0.693807	ns
KNG	SSD	-0.04	0.0234308	-1.70716	0.098835	ns
KNG	SY	-0.002	0.0212132	-0.0942809	0.925395	ns
KNG	WHM	-0.021	0.0219317	-0.957518	0.344213	ns
KNG	WKH	-0.007	0.0212132	-0.329983	0.743225	ns
KNG	WKT	-0.04	0.0226716	-1.76432	0.0832332	ns
KNG	WPN	0.003	0.0219317	0.136788	0.891923	ns
KNG	WPT	-0.065	0.0234308	-2.77413	0.00852661	sig
KNG	WSK	-0.047	0.0234308	-2.00591	0.0578967	ns
KNG	WTM	-0.007	0.0219317	-0.319173	0.75095	ns
KNG	WTPMH	-0.16	0.0234308	-6.82863	4.93179e-08	sig
KNG	WTT	-0.133	0.0226716	-5.86638	1.03127e-06	sig
KNKTK	KSP	-0.01	0.0240832	-0.415227	0.684377	ns
KNKTK	MFRC	0.025	0.0247588	1.00974	0.329169	ns
KNKTK	SSD	-0.006	0.0254558	-0.235702	0.816973	ns
KNKTK	SY	0.032	0.0234308	1.36573	0.195799	ns
KNKTK	WHM	0.013	0.0240832	0.539796	0.597905	ns
KNKTK	WKH	0.027	0.0234308	1.15233	0.270351	ns
KNKTK	WKT	-0.006	0.0247588	-0.242338	0.811552	ns
KNKTK	WPN	0.037	0.0240832	1.53634	0.147123	ns
KNKTK	WPT	-0.031	0.0254558	-1.21779	0.240957	ns
KNKTK	WSK	-0.013	0.0254558	-0.510688	0.618224	ns
KNKTK	WTM	0.027	0.0240832	1.12111	0.280343	ns
KNKTK	WTPMH	-0.126	0.0254558	-4.94975	0.000149287	sig
KNKTK	WTT	-0.099	0.0247588	-3.99857	0.00121261	sig
KSP	MFRC	0.035	0.0233452	1.49924	0.142649	ns
KSP	SSD	0.004	0.0240832	0.166091	0.86923	ns
KSP	SY	0.042	0.0219317	1.91504	0.0632538	ns
KSP	WHM	0.023	0.0226274	1.01647	0.315676	ns
KSP	WKH	0.037	0.0219317	1.68705	0.0998205	ns
KSP	WKT	0.004	0.0233452	0.171341	0.864606	ns
KSP	WPN	0.047	0.0226274	2.07713	0.0446004	sig
KSP	WPT	-0.021	0.0240832	-0.871977	0.388602	ns
KSP	WSK	-0.003	0.0240832	-0.124568	0.901984	ns
KSP	WTM	0.037	0.0226274	1.63518	0.108595	ns
KSP	WTPMH	-0.116	0.0240832	-4.81664	2.41674e-05	sig
KSP	WTT	-0.089	0.0233452	-3.81234	0.000508564	sig
MFRC	SSD	-0.031	0.0247588	-1.25208	0.220569	ns
MFRC	SY	0.007	0.0226716	0.308757	0.75938	ns
MFRC	WHM	-0.012	0.0233452	-0.514023	0.610353	ns
MFRC	WKH	0.002	0.0226716	0.0882162	0.93021	ns
MFRC	WKT	-0.031	0.0240416	-1.28943	0.203511	ns
MFRC	WPN	0.012	0.0233452	0.514023	0.610419	ns
MFRC	WPT	-0.056	0.0247588	-2.26182	0.0296773	sig
MFRC	WSK	-0.038	0.0247588	-1.53481	0.138672	ns
MFRC	WTM	0.002	0.0233452	0.0856706	0.932129	ns
MFRC	WTPMH	-0.151	0.0247588	-6.09883	5.12871e-07	sig
MFRC	WTT	-0.124	0.0240416	-5.15772	9.97696e-06	sig
SSD	SY	0.038	0.0234308	1.6218	0.116182	ns
SSD	WHM	0.019	0.0240832	0.788932	0.436418	ns
SSD	WKH	0.033	0.0234308	1.40841	0.169994	ns
SSD	WKT	0	0.0247588	0	1	ns
SSD	WPN	0.043	0.0240832	1.78548	0.0845787	ns
SSD	WPT	-0.025	0.0254558	-0.982093	0.333534	ns
SSD	WSK	-0.007	0.0254558	-0.274986	0.78598	ns
SSD	WTM	0.033	0.0240832	1.37025	0.179795	ns
SSD	WTPMH	-0.12	0.0254558	-4.71404	4.90862e-05	sig
SSD	WTT	-0.093	0.0247588	-3.75624	0.000755545	sig
SY	WHM	-0.019	0.0219317	-0.866325	0.39175	ns
SY	WKH	-0.005	0.0212132	-0.235702	0.814964	ns
SY	WKT	-0.038	0.0226716	-1.67611	0.0995709	ns
SY	WPN	0.005	0.0219317	0.22798	0.820918	ns
SY	WPT	-0.063	0.0234308	-2.68877	0.0106498	sig
SY	WSK	-0.045	0.0234308	-1.92055	0.0685901	ns
SY	WTM	-0.005	0.0219317	-0.22798	0.820638	ns
SY	WTPMH	-0.158	0.0234308	-6.74328	7.00159e-08	sig
SY	WTT	-0.131	0.0226716	-5.77816	1.44921e-06	sig
WHM	WKH	0.014	0.0219317	0.638345	0.526986	ns
WHM	WKT	-0.019	0.0233452	-0.813871	0.41924	ns
WHM	WPN	0.024	0.0226274	1.06066	0.295373	ns
WHM	WPT	-0.044	0.0240832	-1.827	0.0752709	ns
WHM	WSK	-0.026	0.0240832	-1.07959	0.291754	ns
WHM	WTM	0.014	0.0226274	0.618718	0.538954	ns
WHM	WTPMH	-0.139	0.0240832	-5.77166	1.14908e-06	sig
WHM	WTT	-0.112	0.0233452	-4.79755	2.55885e-05	sig
WKH	WKT	-0.033	0.0226716	-1.45557	0.1512	ns
WKH	WPN	0.01	0.0219317	0.455961	0.651024	ns
WKH	WPT	-0.058	0.0234308	-2.47538	0.0178719	sig
WKH	WSK	-0.04	0.0234308	-1.70716	0.102513	ns
WKH	WTM	0	0.0219317	0	1	ns
WKH	WTPMH	-0.153	0.0234308	-6.52988	1.23809e-07	sig
WKH	WTT	-0.126	0.0226716	-5.55762	2.67388e-06	sig
WKT	WPN	0.043	0.0233452	1.84192	0.0710718	ns
WKT	WPT	-0.025	0.0247588	-1.00974	0.317401	ns
WKT	WSK	-0.007	0.0247588	-0.282727	0.779525	ns
WKT	WTM	0.033	0.0233452	1.41356	0.161866	ns
WKT	WTPMH	-0.12	0.0247588	-4.84675	1.30512e-05	sig
WKT	WTT	-0.093	0.0240416	-3.86829	0.000322019	sig
WPN	WPT	-0.068	0.0240832	-2.82355	0.00746722	sig
WPN	WSK	-0.05	0.0240832	-2.07614	0.0496302	sig
WPN	WTM	-0.01	0.0226274	-0.441942	0.660529	ns
WPN	WTPMH	-0.163	0.0240832	-6.76821	5.42405e-08	sig
WPN	WTT	-0.136	0.0233452	-5.8256	1.11039e-06	sig
WPT	WSK	0.018	0.0254558	0.707107	0.486085	ns
WPT	WTM	0.058	0.0240832	2.40832	0.0200815	sig
WPT	WTPMH	-0.095	0.0254558	-3.73195	0.00060514	sig
WPT	WTT	-0.068	0.0247588	-2.74649	0.0091552	sig
WSK	WTM	0.04	0.0240832	1.66091	0.10946	ns
WSK	WTPMH	-0.113	0.0254558	-4.43906	0.000166951	sig
WSK	WTT	-0.086	0.0247588	-3.47351	0.00205208	sig
WTM	WTPMH	-0.153	0.0240832	-6.35298	9.82571e-08	sig
WTM	WTT	-0.126	0.0233452	-5.39725	2.50981e-06	sig
WTPMH	WTT	0.027	0.0247588	1.09052	0.282542	ns
